# Supplementary material for: Integrated analysis of metabolome in a EUS-FNA sample with transcriptome in the TCGA cohort of pancreatic head and body/tail adenocarcinoma
Source: publisher site journal article supplement (doi:10.18632/aging.202700), 2021-03-10
Supplement: Supplementary file [file aging-v13i6-202700-supplementary-material-SD1.pdf]

## SUPPLEMENTARY FIGURES

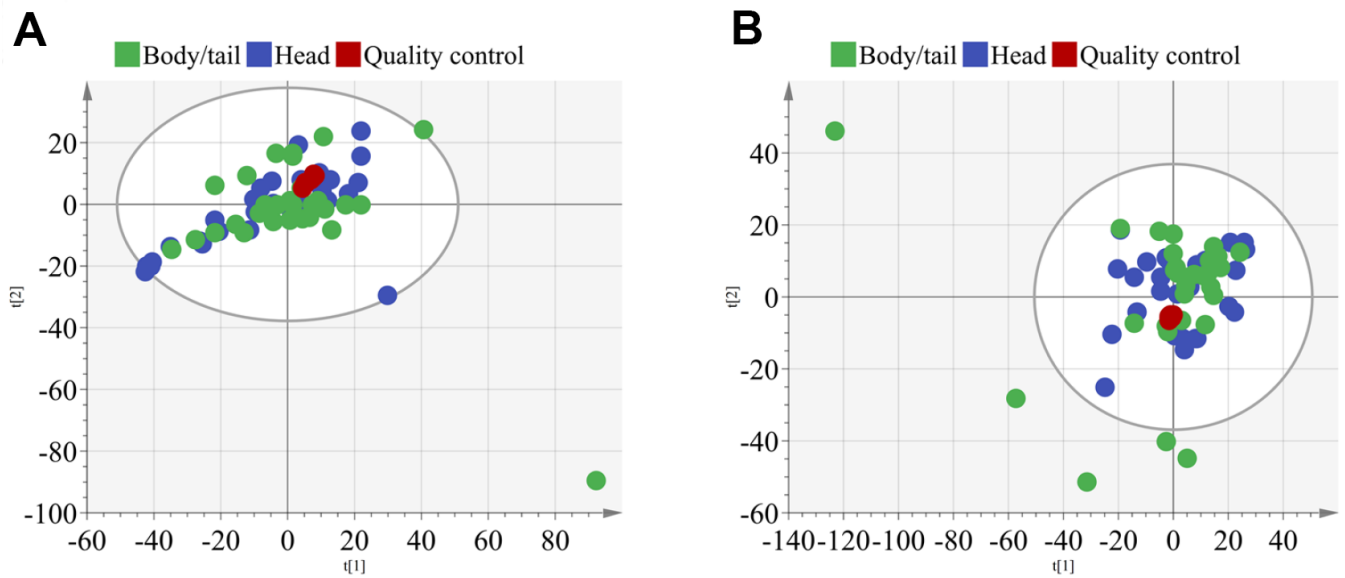

**Supplementary Figure 1. The quality control testing by including quality control samples into the PCA analysis. (A) the PCA plot in ESI<sup>+</sup> mode. (B) the PCA plot in ESI<sup>-</sup> mode.**

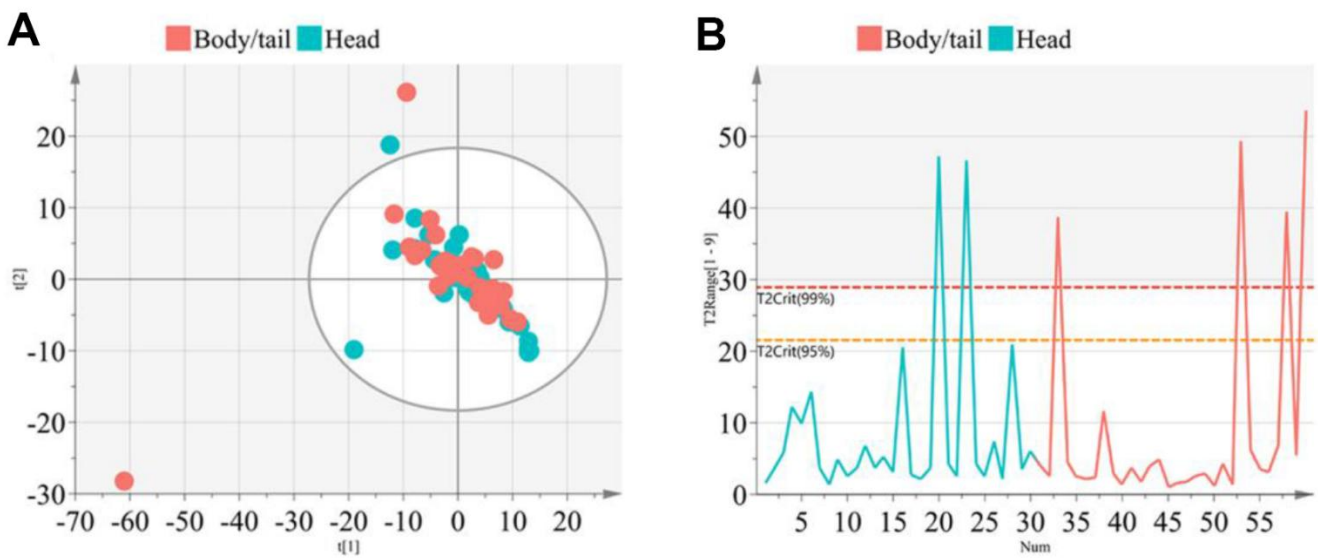

**Supplementary Figure 2. The total PCA analysis indicated the six outliers. (A) the PCA plot. (B) Hotelling's T2 plot shows six cases with values larger than the 99% confidence limit were considered as outlier.**

Valine, leucine and isoleucine biosynthesis

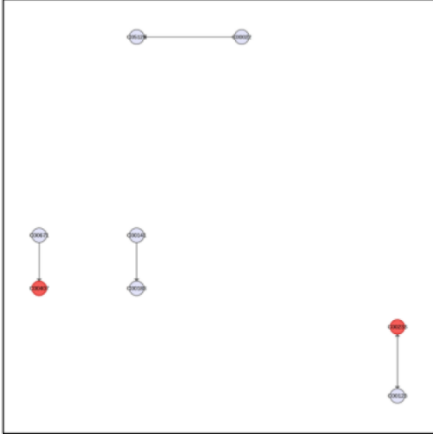

Glycerophospholipid metabolism

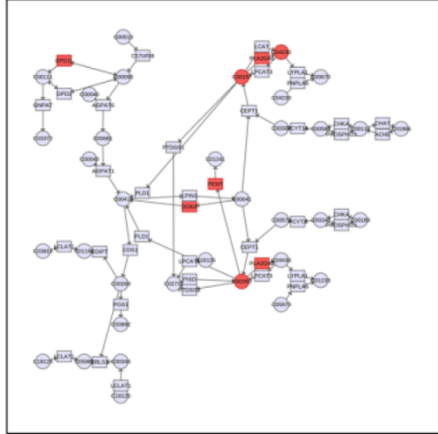

Phenylalanine metabolism

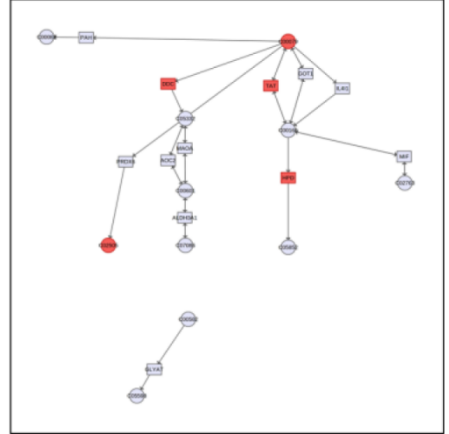

Supplementary Figure 3. The metabolism pathway of the top three enriched items, labeled with metabolites and enzyme-coded genes.
