# Supplementary material for: Integrated analysis of metabolome in a EUS-FNA sample with transcriptome in the TCGA cohort of pancreatic head and body/tail adenocarcinoma
Source: Aging (Albany NY). 2021 Mar 10;13(6):8880–94. doi: 10.18632/aging.202700 (PMC8034907; doi:10.18632/aging.202700)
Supplement: Supplementary Table 1 [file aging-13-202700-s002.xls]

## Sheet: Sheet1
		Supplementary Table 1. The detailed DEM and DMG lists.
	The differential metabolites identified in the metabolome analysis for SHCC cohort
	ID	Name	HMDB	Molecular.Weight	RT.[min]	VIP	ESI	T.stat	T.test.p.value	FDR	Fold Change
	N10	L-Lactic acid	HMDB0000190	90.03	1.164	0.713481	negative	-0.011196	0.99111	0.99212	0.99724
	N1033	Riboflavin	HMDB0000244	376.134	3.093	1.16528	negative	-0.84032	0.40458	0.74631	0.6205
	N1044	Sphingosine 1-phosphate	HMDB0000277	379.249	7.352	1.23406	negative	1.1663	0.24881	0.74631	1.2426
	N107	Oxoglutaric acid	HMDB0000208	146.02	0.891	0.892869	negative	1.1092	0.27247	0.74631	1.3208
	N1077	Urolithin B 3-O-glucuronide	HMDB41787	388.076	3.133	0.581066	negative	1.0312	0.30722	0.74631	8.6775
	N109	D-Glutamine	HMDB0003423	146.068	0.882	1.12538	negative	1.2371	0.22161	0.74631	1.1768
	N1091	Deoxycholic acid	HMDB0000626	392.293	7.293	1.03812	negative	1.7281	0.089898	0.74631	2.3014
	N11	L-Lactic acid	HMDB0000190	90.03	1.046	1.24232	negative	1.4201	0.16156	0.74631	1.3077
	N1139	Cholic acid	HMDB0000619	408.288	6.096	0.920664	negative	1.5961	0.11653	0.74631	3.31
	N114	L-Glutamic acid	HMDB0000148	147.052	0.892	0.416522	negative	0.16537	0.8693	0.93641	1.0225
	N1144	LysoPA(0:0/16:0)	HMDB0007849	410.243	9.08	0.869467	negative	-0.49912	0.6198	0.83112	0.96504
	N1153	Perfluorooctanoic acid	HMDB0059587	413.974	6.294	0.466294	negative	1.3523	0.18214	0.74631	1.4694
	N1161	CPA(18:1/0:0)	HMDB0007005	418.243	3.199	0.70597	negative	-0.89353	0.37569	0.74631	0.15994
	N1180	1-heptadecanoyl-glycero-3-phosphate	HMDB0062318	424.259	10.126	1.01767	negative	-1.3804	0.17338	0.74631	0.31598
	N1181	1-heptadecanoyl-glycero-3-phosphate	HMDB0062318	424.259	9.867	0.731097	negative	-1.0657	0.2915	0.74631	0.28587
	N1182	1-heptadecanoyl-glycero-3-phosphate	HMDB0062318	424.259	9.665	0.433808	negative	0.22807	0.82048	0.91582	1.198
	N1186	LysoPE(0:0/14:0)	HMDB0011470	425.254	7.38	1.34448	negative	-1.5423	0.12908	0.74631	0.63166
	N1187	LysoPE(0:0/14:0)	HMDB0011470	425.262	9.814	0.716012	negative	-1.1682	0.24805	0.74631	0.25622
	N1192	ADP	HMDB0001341	427.029	1.011	1.03054	negative	0.59869	0.55198	0.78663	1.1429
	N12	L-Lactic acid	HMDB0000190	90.03	0.91	0.624312	negative	0.52307	0.60315	0.81816	1.1252
	N1207	MG(24:6/0:0/0:0)	HMDB0011590	430.308	7.845	0.409108	negative	-0.354	0.72477	0.8721	0.88748
	N1230	LysoPE(0:0/15:0)	HMDB0011472	439.27	7.859	1.41978	negative	-1.7152	0.092259	0.74631	0.56033
	N1246	1,25-Dihydroxyvitamin D3-26,23-lactone	HMDB0000969	444.288	7.548	0.773738	negative	1.4707	0.14739	0.74631	11.796
	N1256	13'-Carboxy-gamma-tocopherol	HMDB0012557	446.339	10.117	1.24115	negative	1.4772	0.14566	0.74631	1.4608
	N1257	13'-Carboxy-gamma-tocopherol	HMDB0012557	446.339	10.481	1.38196	negative	1.3106	0.19574	0.74631	1.3636
	N1258	13'-Carboxy-gamma-tocopherol	HMDB0012557	446.34	10.361	1.36944	negative	1.3201	0.19259	0.74631	1.399
	N1268	Glycoursodeoxycholic acid	HMDB0000708	449.314	6.222	0.664136	negative	0.90171	0.37137	0.74631	2.1464
	N1270	Glycoursodeoxycholic acid	HMDB0000708	449.314	5.427	0.863232	negative	1.3372	0.18697	0.74631	3.8336
	N1271	Glycoursodeoxycholic acid	HMDB0000708	449.314	5.743	0.542871	negative	0.66134	0.51132	0.77344	1.6488
	N1281	LysoPE(0:0/16:1)	HMDB0011474	451.27	8.149	0.889153	negative	-0.33498	0.73898	0.87535	0.83822
	N1282	LysoPE(0:0/16:1)	HMDB0011474	451.27	7.642	1.38319	negative	-1.5481	0.12767	0.74631	0.65288
	N1283	LysoPE(0:0/16:1)	HMDB0011474	451.27	7.475	1.28895	negative	-1.1503	0.25528	0.74631	0.79549
	N129	Citramalic acid	HMDB0000426	148.036	1.164	1.29469	negative	0.82537	0.41293	0.74631	1.2091
	N1293	LysoPE(0:0/16:0)	HMDB0011473	453.285	8.153	1.5692	negative	-1.8933	0.063884	0.74631	0.58445
	N1294	LysoPE(0:0/16:0)	HMDB0011473	453.285	8.343	1.55615	negative	-1.8508	0.069877	0.74631	0.60116
	N130	Citramalic acid	HMDB0000426	148.036	0.889	0.977413	negative	0.74709	0.45837	0.75451	1.1688
	N1306	3-Sulfodeoxycholic acid	HMDB0002504	458.234	10.894	0.777094	negative	0.40491	0.68721	0.86941	1.0877
	N133	D-Xylose	HMDB0000098	150.052	0.882	1.0073	negative	0.086167	0.93166	0.96288	1.0203
	N1330	Glycocholic acid	HMDB0000138	465.309	4.838	1.14884	negative	1.9045	0.062378	0.74631	3.6521
	N1342	Cholesterol sulfate	HMDB0000653	466.311	13.137	0.298247	negative	-0.064046	0.94918	0.96819	0.98425
	N1344	Cholesterol sulfate	HMDB0000653	466.312	5.404	0.48607	negative	0.78112	0.43827	0.75096	1.8429
	N1346	LysoPC(14:0/0:0)	HMDB0010379	467.301	8.832	1.5241	negative	-2.1084	0.03983	0.74631	0.49482
	N137	Xanthine	HMDB0000292	152.032	0.917	0.664893	negative	-0.95339	0.3448	0.74631	0.77978
	N1399	LysoPE(0:0/18:1)	HMDB0011475	479.301	7.255	0.90344	negative	1.0075	0.31838	0.74631	1.3475
	N141	L-Histidine	HMDB0000177	155.068	0.837	1.60518	negative	1.7151	0.092278	0.74631	1.2791
	N1412	LysoPC(15:0)	HMDB0010381	481.317	8.38	1.19403	negative	0.59728	0.55291	0.78663	1.0841
	N1462	PA(8:0/13:0)	HMDB0115484	494.306	13.674	1.02895	negative	0.94013	0.3515	0.74631	2.581
	N149	Allantoin	HMDB0000462	158.043	0.921	1.01469	negative	0.11216	0.91113	0.95629	1.0394
	N1502	Adenosine triphosphate	HMDB0000538	506.995	1.029	1.02515	negative	0.6819	0.49833	0.77344	1.2692
	N1506	LysoPE(0:0/20:1)	HMDB0011482	507.34	7.011	1.39257	negative	1.0747	0.28745	0.74631	1.9921
	N1512	LysoPE(0:0/20:0)	HMDB0011481	509.348	9.569	0.943019	negative	0.34493	0.73153	0.87254	1.0566
	N1538	Taurocholic acid	HMDB0000036	515.291	4.533	1.06802	negative	-1.4517	0.15258	0.74631	0.065711
	N1539	Taurocholic acid	HMDB0000036	515.291	4.832	0.547133	negative	-0.59069	0.55729	0.79073	0.58528
	N1540	Taurocholic acid	HMDB0000036	515.291	4.117	1.16263	negative	1.6989	0.095312	0.74631	1.3891
	N1552	LysoPC(18:3)	HMDB0010387	517.311	3.38	0.617532	negative	0.88631	0.37953	0.74631	2.1559
	N1571	LysoPE(0:0/22:6)	HMDB0011496	525.285	7.889	1.05853	negative	1.2406	0.22031	0.74631	1.2367
	N1586	LysoPE(0:0/22:5)	HMDB0011494	527.301	8.393	0.97024	negative	1.3857	0.17176	0.74631	1.263
	N159	Alanyl-Alanine	HMDB0028680	160.082	16.243	0.804804	negative	-0.10389	0.91766	0.95629	0.99073
	N1595	N-[(3a,5b,7b)-7-hydroxy-24-oxo-3-(sulfooxy)cholan-24-yl]-Glycine	HMDB0002409	529.271	4.317	1.22274	negative	-0.95953	0.34173	0.74631	0.0083989
	N160	5-Hydroxyvalproic acid	HMDB0013898	160.109	4.561	1.27042	negative	1.5203	0.13449	0.74631	1.395
	N166	3-Hydroxymethylglutaric acid	HMDB0000355	162.052	0.908	1.02237	negative	0.69128	0.49246	0.77344	1.1467
	N17	Hydrogen phosphate	HMDB0000973	97.9752	0.983	0.408888	negative	-0.47713	0.63527	0.83565	0.94786
	N1733	Cholesterol glucuronide	HMDB0010330	562.386	11.047	0.637186	negative	-0.66485	0.50908	0.77344	0.8202
	N1749	Ceramide (d18:1/18:0)	HMDB0004950	565.539	0.838	1.65301	negative	2.4154	0.019266	0.74631	2.0406
	N1750	Uridine diphosphate glucose	HMDB0000286	566.055	0.973	0.80735	negative	-1.1432	0.25819	0.74631	0.82666
	N178	L-Phenylalanine	HMDB0000159	165.078	5.03	1.45707	negative	2.0383	0.046625	0.74631	1.4374
	N1815	Biliverdin	HMDB0001008	582.248	5.995	1.35585	negative	-1.9041	0.06244	0.74631	0.56929
	N182	Arabinonic acid	HMDB0000539	166.047	0.883	1.25023	negative	1.401	0.16715	0.74631	1.2848
	N1824	Cholic acid glucuronide	HMDB0002577	584.317	3.553	1.5939	negative	1.7139	0.092506	0.74631	4.5832
	N183	3-Phenoxypropionic acid	HMDB0002229	166.062	3.653	0.311047	negative	0.10318	0.91822	0.95629	1.0254
	N1860	Taurocholic acid 3-sulfate	HMDB0002581	595.248	3.77	1.30962	negative	-1.0675	0.29067	0.74631	0.16447
	N1861	Taurocholic acid 3-sulfate	HMDB0002581	595.248	3.618	1.48072	negative	-1.548	0.12769	0.74631	0.11512
	N1862	Taurocholic acid 3-sulfate	HMDB0002581	595.248	4.035	1.16187	negative	-1.5346	0.13095	0.74631	0.041121
	N1897	UDP-N-acetyl-D-mannosamine	HMDB0013112	607.082	0.964	1.11646	negative	-1.6021	0.11519	0.74631	0.62329
	N19	2-Ketobutyric acid	HMDB0000005	102.03	1.169	0.714948	negative	0.96006	0.34147	0.74631	1.2271
	N190	Homogentisic acid	HMDB0000130	168.041	4.42	0.42368	negative	0.22939	0.81946	0.91582	1.1392
	N1912	Oxidized glutathione	HMDB0003337	612.151	0.89	0.195738	negative	0.048562	0.96145	0.97537	1.0105
	N1913	Oxidized glutathione	HMDB0003337	612.152	1.172	1.02375	negative	0.92583	0.35881	0.74631	1.2757
	N1914	Cholestane-3,7,12,25-tetrol-3-glucuronide	HMDB0010355	612.387	6.167	0.648083	negative	-0.68742	0.49487	0.77344	0.65908
	N1915	Cholestane-3,7,12,25-tetrol-3-glucuronide	HMDB0010355	612.387	5.955	0.554235	negative	-0.62711	0.53333	0.78663	0.71808
	N192	2-Furoylglycine	HMDB0000439	169.034	0.889	0.404134	negative	-0.34802	0.72923	0.8721	0.9593
	N1930	DG(14:0/22:4)/0:0)	HMDB0007031	616.502	13.681	0.604031	negative	0.7178	0.47609	0.77344	1.3387
	N1947	Glycochenodeoxycholic acid 3-glucuronide	HMDB0002579	625.346	4.638	1.21071	negative	-0.89281	0.37607	0.74631	0.11295
	N1948	Glycochenodeoxycholic acid 3-glucuronide	HMDB0002579	625.346	5.316	1.16441	negative	-0.83783	0.40596	0.74631	0.68184
	N1949	Glycochenodeoxycholic acid 3-glucuronide	HMDB0002579	625.359	9.034	0.788744	negative	-0.22556	0.82243	0.91624	0.91365
	N1953	LysoPI(20:0/0:0)	HMDB0240260	628.354	2.798	0.760441	negative	0.3627	0.7183	0.87119	1.099
	N196	Diethylthiophosphate	HMDB0001460	170.014	0.965	0.835026	negative	1.2072	0.23282	0.74631	1.4093
	N20	2-Ketobutyric acid	HMDB0000005	102.03	0.907	1.07646	negative	0.76773	0.44612	0.75205	1.1479
	N203	Glycerol 3-phosphate	HMDB0000126	172.012	0.954	1.095	negative	-1.32	0.19261	0.74631	0.68535
	N2031	PE(14:0/P-18:0)	HMDB0008851	675.517	0.871	0.425455	negative	0.30779	0.75947	0.87807	1.1613
	N2039	PE(14:0/18:4)	HMDB0008832	683.453	0.836	1.68819	negative	2.5586	0.01346	0.74631	2.0349
	N2053	PE(18:4/P-16:0)	HMDB0009213	695.486	0.847	0.261282	negative	0.34354	0.73258	0.87254	1.0888
	N2055	PE(16:1/P-18:1)	HMDB0011405	699.52	10.025	0.948119	negative	1.3679	0.17721	0.74631	3.0092
	N2057	PE(16:1/P-18:0)	HMDB0008983	701.536	16.268	0.3977	negative	-1.3024	0.19853	0.74631	0.31427
	N2066	PE(14:0/20:5)	HMDB0008840	709.464	0.842	0.696184	negative	0.39785	0.69237	0.86941	1.0629
	N2078	3-O-Sulfogalactosylceramide (d18:1/12:0)	HMDB0012311	723.468	9.204	0.825195	negative	-0.87846	0.38373	0.74631	0.39933
	N2079	PE(18:3/P-18:1)	HMDB0011411	723.52	10.686	0.920953	negative	0.33441	0.73941	0.87535	1.0752
	N208	Quinaldic acid	HMDB0000842	173.046	3.077	0.584425	negative	-0.55917	0.57845	0.80139	0.89414
	N2084	PS(14:1/18:3)	HMDB0012348	727.435	0.84	1.36884	negative	1.7372	0.088278	0.74631	1.3951
	N209	Phenol sulphate	HMDB0060015	173.998	2.811	0.704987	negative	-0.885	0.38023	0.74631	0.71628
	N2093	PC(18:4/15:0)	HMDB0008231	739.515	16.272	1.27874	negative	-1.6347	0.10815	0.74631	0.71551
	N21	gamma-Aminobutyric acid	HMDB0000112	103.062	0.88	0.384481	negative	-0.061098	0.95152	0.96819	0.9907
	N210	Dehydroascorbic acid	HMDB0001264	174.015	0.89	0.365438	negative	-0.19293	0.84776	0.92512	0.97034
	N2104	PE(20:4/P-18:1)	HMDB0009414	749.535	10.718	1.13549	negative	1.0572	0.29532	0.74631	1.2262
	N2115	PE(16:0/22:6)	HMDB0005780	763.515	10.964	1.36307	negative	-2.0702	0.043416	0.74631	0.60194
	N212	Suberic acid	HMDB0000893	174.088	3.536	0.506317	negative	-0.55954	0.5782	0.80139	0.95802
	N2126	PS(15:0/20:0)	HMDB0112327	777.552	16.315	1.03491	negative	-1.5911	0.11764	0.74631	0.47999
	N213	N-Acetylornithine	HMDB0003357	174.099	0.893	0.685178	negative	-0.93189	0.3557	0.74631	0.23847
	N214	L-Arginine	HMDB0000517	174.111	0.822	0.344526	negative	0.30645	0.76049	0.87807	1.0594
	N2149	PS(18:0/20:4)	HMDB0010165	811.536	16.312	0.702881	negative	-0.67573	0.5022	0.77344	0.90308
	N216	N-Acetyl-L-aspartic acid	HMDB0000812	175.047	0.956	0.571268	negative	1.4114	0.16409	0.74631	1.7405
	N2163	PI(16:0/18:1	HMDB0009782	836.541	16.301	0.598376	negative	-0.07315	0.94197	0.96819	0.99129
	N222	Hippuric acid	HMDB0000714	179.057	3.138	0.87005	negative	1.2259	0.22574	0.74631	1.9126
	N223	Hippuric acid	HMDB0000714	179.057	4.44	1.33964	negative	1.7173	0.091878	0.74631	1.296
	N224	Hippuric acid	HMDB0000714	179.057	4.328	1.28572	negative	1.978	0.053236	0.74631	1.3136
	N229	D-Glucose	HMDB0000122	180.063	0.874	1.22312	negative	1.3663	0.17773	0.74631	1.2532
	N2297	Ganglioside GD1a (d18:0/12:0)	HMDB0011777	1753.9	4.169	1.2339	negative	0.76282	0.44902	0.75205	1.4989
	N240	3,4-Dihydroxyhydrocinnamic acid	HMDB0000423	182.057	2.686	1.04465	negative	0.98294	0.33019	0.74631	1.2096
	N270	Glycylleucine	HMDB0000759	188.115	1.247	0.358734	negative	-0.44879	0.65545	0.84976	0.71054
	N271	Glycylleucine	HMDB0000759	188.115	2.577	0.206156	negative	-0.51551	0.60838	0.82336	0.71347
	N272	3-Hydroxycapric acid	HMDB0002203	188.14	6.333	1.65803	negative	-2.2069	0.031763	0.74631	0.57958
	N28	3-Hydroxybutyric acid	HMDB0000357	104.046	1.479	1.14229	negative	1.384	0.17227	0.74631	1.2733
	N283	N-Lactoylvaline	HMDB0062181	189.099	9.21	0.754154	negative	-0.9985	0.32266	0.74631	0.74868
	N290	Ethyl 4-(acetylthio)butyrate	HMDB0032259	190.064	0.909	0.515955	negative	-0.77268	0.44321	0.75205	0.84212
	N296	5-Hydroxyindoleacetic acid	HMDB0000763	191.061	2.865	1.63742	negative	2.3677	0.021653	0.74631	1.5025
	N302	Citric acid	HMDB0000094	192.026	0.893	0.416586	negative	-0.15855	0.87463	0.93699	0.96669
	N309	Gluconic acid	HMDB0000625	196.057	0.892	0.978014	negative	0.30609	0.76076	0.87807	1.0789
	N31	Glyceric acid	HMDB0000139	106.025	0.887	0.947598	negative	0.42009	0.67615	0.86892	1.0991
	N310	2,6-Dimethoxy-4-propylphenol	HMDB0036226	196.109	5.459	1.07353	negative	1.814	0.075447	0.74631	1.6455
	N326	D-Erythrose 4-phosphate	HMDB0001321	200.008	0.979	0.872916	negative	1.3194	0.19282	0.74631	1.4737
	N327	4-Vinylphenol sulfate	HMDB0062775	200.013	3.788	0.937148	negative	0.1211	0.90408	0.95323	1.036
	N331	(Â±)-Camphoric acid	HMDB0034491	200.104	4.243	0.535945	negative	0.59763	0.55268	0.78663	1.2637
	N338	Sebacic acid	HMDB0000792	202.12	4.492	0.694875	negative	0.75222	0.45531	0.75451	1.0685
	N339	Alanyl-Leucine	HMDB0028691	202.131	2.548	0.187636	negative	-0.2006	0.84179	0.92512	0.85602
	N341	L-Acetylcarnitine	HMDB0000201	203.115	3.607	1.35279	negative	1.2665	0.21098	0.74631	1.3598
	N347	Valyl-Serine	HMDB0029136	204.11	1.205	0.507188	negative	-0.65957	0.51244	0.77344	0.47946
	N350	Indolelactic acid	HMDB0000671	205.073	3.736	1.0822	negative	1.0194	0.31271	0.74631	1.2223
	N351	5-Sulfoxymethylfurfural	HMDB0059752	205.987	2.239	1.16207	negative	-0.68454	0.49667	0.77344	0.4404
	N357	Dihydrolipoate	HMDB0012210	208.058	0.918	0.908233	negative	0.19936	0.84276	0.92512	1.0459
	N358	gamma-Asarone	HMDB0029872	208.109	5.788	1.00553	negative	-0.31114	0.75693	0.87807	0.97609
	N377	Traumatin	HMDB0037326	212.14	6.383	0.848015	negative	-0.736	0.46504	0.76219	0.61707
	N378	Traumatin	HMDB0037326	212.14	6.677	0.863228	negative	-0.7968	0.42919	0.74631	0.65334
	N381	Indoxyl sulfate	HMDB0000682	213.012	2.796	1.53416	negative	-2.1193	0.038859	0.74631	0.36975
	N386	5-Hexyltetrahydro-2-oxo-3-furancarboxylic acid	HMDB0030984	214.12	5.511	0.890943	negative	-0.89489	0.37497	0.74631	0.60519
	N387	5-Hexyltetrahydro-2-oxo-3-furancarboxylic acid	HMDB0030984	214.12	4.572	1.25837	negative	1.5132	0.13628	0.74631	1.4729
	N39	Glutarate semialdehyde	HMDB0012233	116.046	1.812	1.51698	negative	1.4975	0.14031	0.74631	1.2581
	N397	12-Hydroxydodecanoic acid	HMDB0002059	216.172	7.169	1.21168	negative	1.2133	0.23051	0.74631	1.1738
	N40	L-Valine	HMDB0000883	117.077	1.012	1.22519	negative	1.4275	0.1594	0.74631	1.3028
	N406	Asparaginyl-Serine	HMDB0028740	219.089	3.704	0.85322	negative	0.28752	0.77485	0.88454	1.1153
	N413	5-Hydroxy-L-tryptophan	HMDB0000472	220.084	1.38	1.48828	negative	1.6647	0.10198	0.74631	1.3471
	N415	L-Cystathionine	HMDB0000099	222.067	0.916	1.13016	negative	1.5965	0.11644	0.74631	1.0706
	N416	Phenylalanyl-Glycine	HMDB0028995	222.1	2.777	1.43579	negative	0.9634	0.33981	0.74631	1.3554
	N42	Methylmalonic acid	HMDB0000202	118.025	1.203	0.282499	negative	-0.079872	0.93665	0.96463	0.98283
	N421	Methyl jasmonate	HMDB0036583	224.14	6.56	2.06444	negative	2.8004	0.0071476	0.74631	1.5504
	N43	Methylmalonic acid	HMDB0000202	118.025	0.92	0.332174	negative	-0.12065	0.90443	0.95323	0.97748
	N44	β-Hydroxyisovaleric acid	HMDB0000754	118.061	2.711	2.08401	negative	2.8456	0.0063284	0.74631	1.6289
	N445	Prolylhydroxyproline	HMDB0006695	228.11	2.78	1.00113	negative	0.30562	0.76111	0.87807	1.1071
	N446	Traumatic acid	HMDB0000933	228.136	5.137	0.783428	negative	1.18	0.24337	0.74631	1.3977
	N447	Myristic acid	HMDB0000806	228.208	7.735	0.83551	negative	-0.74888	0.4573	0.75451	0.75689
	N45	Erythrose	HMDB0002649	120.041	0.876	1.23412	negative	1.1971	0.23671	0.74631	1.2038
	N452	Dodecanedioic acid	HMDB0000623	230.151	5.502	0.283922	negative	0.47276	0.63836	0.83565	1.0796
	N457	Asparaginyl-Valine	HMDB0028744	231.121	1.227	0.675641	negative	-0.87698	0.38453	0.74631	0.1926
	N47	4-Hydroxybenzaldehyde	HMDB0011718	122.035	3.333	0.369197	negative	0.34024	0.73504	0.8737	1.0345
	N479	N'-Formylkynurenine	HMDB0001200	236.079	1.243	0.947408	negative	-0.86644	0.39023	0.74631	0.37397
	N490	L-Menthyl acetoacetate	HMDB0032369	240.172	7.228	1.58813	negative	1.9629	0.055019	0.74631	1.4058
	N499	3-Oxotetradecanoic acid	HMDB0010730	242.188	7.818	1.13444	negative	1.1334	0.26225	0.74631	1.2425
	N503	Cytidine	HMDB0000089	243.087	0.928	1.015	negative	-1.5776	0.12072	0.74631	0.67637
	N504	N-Undecanoylglycine	HMDB0013286	243.183	5.223	1.05755	negative	-1.0806	0.28485	0.74631	0.90325
	N507	Fucose 1-phosphate	HMDB0001265	244.034	0.978	0.696405	negative	0.39266	0.69618	0.86941	1.2288
	N510	Uridine	HMDB0000296	244.069	1.171	0.744348	negative	-0.76593	0.44718	0.75205	0.88208
	N511	Uridine	HMDB0000296	244.069	0.893	0.434982	negative	-0.060902	0.95167	0.96819	0.98825
	N513	Leucyl-Leucine	HMDB0028933	244.178	3.312	0.990873	negative	0.98953	0.32699	0.74631	1.5109
	N530	Aspartyl-Asparagine	HMDB0028748	247.082	3.449	0.875466	negative	0.43372	0.66628	0.86001	1.1203
	N542	Alanyl-Tyrosine	HMDB0028699	252.111	2.719	0.25851	negative	0.36102	0.71955	0.87119	1.2263
	N543	Histidinyl-Proline	HMDB0028893	252.121	2.745	1.04692	negative	-0.2901	0.77289	0.88454	0.90279
	N546	Daidzein	HMDB0003312	254.058	4.238	1.32982	negative	-2.3959	0.020214	0.74631	0.56828
	N548	Histidinyl-Valine	HMDB0028898	254.142	4.809	1.38501	negative	-2.0214	0.048396	0.74631	0.38951
	N554	Histidinyl-Threonine	HMDB0028895	256.121	4.214	0.861538	negative	0.61748	0.53961	0.78663	1.1011
	N555	Histidinyl-Threonine	HMDB0028895	256.121	4.326	0.848114	negative	0.43801	0.66319	0.8579	1.0696
	N56	Dihydrothymine	HMDB0000079	128.057	0.867	1.59065	negative	2.244	0.029117	0.74631	1.271
	N564	Tetradecanedioic acid	HMDB0000872	258.183	6.492	0.481698	negative	0.66597	0.50837	0.77344	1.1808
	N565	Tetradecanedioic acid	HMDB0000872	258.183	6.326	0.628438	negative	-0.19419	0.84678	0.92512	0.89765
	N568	Leucyl-Glutamine	HMDB0028927	259.153	2.817	0.747284	negative	0.84601	0.40142	0.74631	1.8537
	N569	5-Methylthioribose 1-phosphate	HMDB0000963	260.017	3.445	0.392699	negative	-0.38344	0.70296	0.87119	0.86873
	N574	gamma-Glutamylisoleucine	HMDB0011170	260.137	2.894	1.06038	negative	0.67749	0.5011	0.77344	1.1612
	N577	L-beta-aspartyl-L-glutamic acid	HMDB0011164	262.081	5.461	1.04499	negative	1.7146	0.092381	0.74631	1.5665
	N578	Phenylalanylproline	HMDB0011177	262.135	2.823	0.64354	negative	0.25754	0.79778	0.90048	1.2067
	N582	N(2)-phenylacetyl-L-glutaminate	HMDB0062645	264.111	3.149	0.753808	negative	0.19416	0.84681	0.92512	1.0536
	N59	Pyroglutamic acid	HMDB0000267	129.041	0.997	0.226176	negative	-0.27348	0.78557	0.89214	0.9637
	N593	Inosine	HMDB0000195	268.081	1.173	0.960451	negative	-1.1255	0.26555	0.74631	0.74245
	N595	Histidinyl-Hydroxyproline	HMDB0028886	268.121	6.298	0.9222	negative	-1.0626	0.29288	0.74631	0.83897
	N596	Histidinyl-Hydroxyproline	HMDB0028886	268.121	6.436	0.80759	negative	-0.92582	0.35882	0.74631	0.86915
	N597	3-carboxy-4-methyl-5-pentyl-2-furanpropanoic acid	HMDB0061643	268.131	6.56	1.98745	negative	2.6696	0.010108	0.74631	1.6207
	N598	N-(p-Hydroxyphenethyl)actinidine	HMDB0030347	268.167	6.319	0.771082	negative	1.6867	0.097652	0.74631	1.7535
	N60	Pyroglutamic acid	HMDB0000267	129.041	1.172	0.785212	negative	0.39221	0.69651	0.86941	1.0878
	N600	Apigenin	HMDB0002124	270.053	4.825	1.79256	negative	-3.3657	0.0014415	0.74631	0.38264
	N604	3-Oxohexadecanoic acid	HMDB0010733	270.219	8.678	0.972706	negative	0.68355	0.4973	0.77344	1.13
	N606	Tridecanoylglycine	HMDB0013317	271.215	6.198	1.11685	negative	-1.4215	0.16115	0.74631	0.8714
	N61	Pyroglutamic acid	HMDB0000267	129.041	0.898	0.799833	negative	0.68356	0.49729	0.77344	1.1221
	N610	16-Hydroxy hexadecanoic acid	HMDB0006294	272.235	7.676	0.735269	negative	-0.96492	0.33905	0.74631	0.83424
	N611	16-Hydroxy hexadecanoic acid	HMDB0006294	272.235	9.3	0.627276	negative	-0.35083	0.72713	0.8721	0.94635
	N612	16-Hydroxy hexadecanoic acid	HMDB0006294	272.235	9.626	0.269954	negative	-0.09574	0.9241	0.95844	0.98073
	N616	Glutamyl-Gamma-glutamate	HMDB0028833	275.112	0.889	0.369883	negative	-0.27583	0.78377	0.89183	0.94383
	N626	Isoleucyl-Phenylalanine	HMDB0028914	278.163	3.499	0.335076	negative	-0.3064	0.76052	0.87807	0.85547
	N63	Glutaconic acid	HMDB0000620	130.025	0.894	1.00858	negative	0.41225	0.68185	0.86941	1.0633
	N633	12S-HHT	HMDB0012535	280.204	7.368	1.36486	negative	2.2913	0.02603	0.74631	1.7751
	N635	Linoleic acid	HMDB0000673	280.24	10.114	0.865887	negative	1.132	0.26284	0.74631	1.1921
	N636	Linoelaidic acid	HMDB0006270	280.24	8.194	1.32921	negative	1.1949	0.23757	0.74631	1.2226
	N64	Glutaconic acid	HMDB0000620	130.025	0.883	1.25379	negative	1.2478	0.21768	0.74631	1.2106
	N642	Oleic acid	HMDB0000207	282.255	10.694	0.865487	negative	0.55187	0.5834	0.80139	1.0952
	N647	Stearic acid	HMDB0000827	284.271	9.226	0.829492	negative	-1.0607	0.29371	0.74631	0.68659
	N65	Ketoleucine	HMDB0000695	130.061	3.227	1.64079	negative	1.954	0.056088	0.74631	1.3676
	N651	Hexadecanedioic acid	HMDB0000672	286.214	7.445	0.5325	negative	0.94996	0.34653	0.74631	1.32
	N66	Ketoleucine	HMDB0000695	130.061	3.041	1.70413	negative	2.0779	0.042676	0.74631	1.3608
	N668	Glutaminylphenylalanine	HMDB0028804	293.138	2.952	1.49989	negative	1.3844	0.17216	0.74631	1.6446
	N673	gamma-Glutamylphenylalanine	HMDB0000594	294.122	2.988	1.09239	negative	-0.78502	0.43601	0.75055	0.83499
	N678	9-HOTE	HMDB0010224	294.219	8.336	0.917513	negative	-0.83939	0.40509	0.74631	0.46265
	N679	9-HOTE	HMDB0010224	294.219	7.539	0.893791	negative	-0.78638	0.43521	0.75055	0.63465
	N680	9-HOTE	HMDB0010224	294.219	8.208	0.92502	negative	-0.90089	0.3718	0.74631	0.44833
	N682	13-OxoODE	HMDB0004668	294.219	8.545	0.99668	negative	1.5082	0.13756	0.74631	1.3123
	N683	15(16)-EpODE	HMDB0010206	294.219	7.329	0.871993	negative	-1.0099	0.31721	0.74631	0.73286
	N685	N4-Acetylsulfamethoxazole	HMDB0013854	295.062	4.078	1.03189	negative	-0.10671	0.91543	0.95629	0.99289
	N69	4-Hydroxyproline	HMDB0000725	131.057	1.227	1.30683	negative	1.2304	0.22408	0.74631	1.1658
	N695	9-HODE	HMDB0010223	296.235	8.907	1.33096	negative	2.0752	0.04293	0.74631	1.3541
	N699	Ricinoleic acid	HMDB0034297	298.25	10.893	0.496101	negative	0.76435	0.44811	0.75205	1.122
	N700	Ricinoleic acid	HMDB0034297	298.25	9.544	0.935747	negative	0.32692	0.74504	0.87674	1.0495
	N701	Ricinoleic acid	HMDB0034297	298.251	8.31	0.439519	negative	0.75018	0.45653	0.75451	1.1113
	N71	Leucinic acid	HMDB0000665	132.077	3.446	0.860395	negative	0.55364	0.5822	0.80139	1.1384
	N710	N-Acetylgalactosamine 4-sulphate	HMDB0000781	301.047	0.873	1.05152	negative	0.97925	0.33199	0.74631	1.454
	N716	N5-Acetyl-N2-gamma-L-glutamyl-L-ornithine	HMDB0039423	303.143	2.615	0.576527	negative	0.39333	0.69569	0.86941	1.2236
	N72	Ornithine	HMDB0000214	132.088	0.862	1.53927	negative	1.5719	0.12205	0.74631	1.2224
	N721	Arachidonic acid	HMDB0001043	304.24	9.981	1.51189	negative	-2.172	0.034441	0.74631	0.50468
	N726	dCMP	HMDB0001202	307.061	4.163	0.681017	negative	-0.41163	0.68231	0.86941	0.91154
	N727	Glutathione	HMDB0000125	307.084	0.945	0.889204	negative	0.54942	0.58507	0.80139	1.2845
	N728	Glutathione	HMDB0000125	307.084	1.172	1.38645	negative	1.6899	0.097041	0.74631	2.0502
	N73	L-Aspartic acid	HMDB0000191	133.036	0.909	0.892754	negative	1.6252	0.11016	0.74631	1.2543
	N731	dUMP	HMDB0001409	308.042	1.054	1.39939	negative	1.4929	0.14151	0.74631	1.5156
	N733	5-O-Methylembelin	HMDB0040867	308.199	6.94	0.7016	negative	0.29459	0.76948	0.88241	1.1339
	N737	N-Acetylneuraminic acid	HMDB0000230	309.107	0.904	0.615207	negative	-0.99697	0.32339	0.74631	0.83277
	N74	5-Hydroxyindole	HMDB0059805	133.055	1.949	1.01019	negative	-1.4093	0.16469	0.74631	0.65283
	N75	L-Malic acid	HMDB0000156	134.02	0.906	0.797702	negative	-0.65554	0.51501	0.77383	0.86518
	N752	4'-Hydroxydiclofenac	HMDB0013974	311.011	5.731	1.20925	negative	1.022	0.31149	0.74631	2.9059
	N756	N-Undecylbenzenesulfonic acid	HMDB0032549	312.176	7.78	1.01131	negative	-1.851	0.069857	0.74631	0.69256
	N759	15,16-DiHODE	HMDB0010208	312.23	6.659	0.91136	negative	-0.92891	0.35723	0.74631	0.34004
	N760	15,16-DiHODE	HMDB0010208	312.23	6.972	0.941385	negative	-1.0153	0.31465	0.74631	0.15573
	N761	15,16-DiHODE	HMDB0010208	312.23	7.07	0.931028	negative	-0.9378	0.35268	0.74631	0.15095
	N762	15,16-DiHODE	HMDB0010208	312.23	7.2	0.927822	negative	-0.85497	0.39649	0.74631	0.24052
	N763	15,16-DiHODE	HMDB0010208	312.23	7.594	0.721958	negative	-0.85925	0.39415	0.74631	0.89196
	N764	15,16-DiHODE	HMDB0010208	312.23	7.89	0.695463	negative	0.39306	0.69588	0.86941	1.0954
	N765	Arachidic acid	HMDB0002212	312.303	9.794	0.822061	negative	-0.76452	0.44801	0.75205	0.69053
	N77	2-Phenylacetamide	HMDB0010715	135.067	4.434	1.76869	negative	2.3135	0.02468	0.74631	1.5524
	N773	12,13-DHOME	HMDB0004705	314.246	6.975	0.658379	negative	0.039762	0.96843	0.98014	1.0032
	N774	12,13-DHOME	HMDB0004705	314.246	7.114	0.7122	negative	0.90642	0.3689	0.74631	1.1379
	N779	Val-Val-Val	HMDB0094676	315.216	3.559	0.600502	negative	0.25587	0.79906	0.90048	1.1879
	N783	(9S,10S)-9,10-dihydroxyoctadecanoate	HMDB0059633	316.261	7.423	1.07394	negative	-0.65873	0.51297	0.77344	0.95453
	N784	(9S,10S)-9,10-dihydroxyoctadecanoate	HMDB0059633	316.261	7.609	0.921808	negative	-0.36193	0.71887	0.87119	0.97492
	N785	(9S,10S)-9,10-dihydroxyoctadecanoate	HMDB0059633	316.261	6.714	0.599873	negative	0.89036	0.37737	0.74631	1.2919
	N79	N-Acetylarylamine	HMDB0001250	135.067	4.446	1.45489	negative	2.0292	0.047566	0.74631	1.4227
	N794	17,18-EpETE	HMDB0010212	318.219	8.851	1.30108	negative	-1.6265	0.1099	0.74631	0.34586
	N795	17,18-EpETE	HMDB0010212	318.219	8.295	1.22549	negative	-1.3562	0.18089	0.74631	0.52926
	N8	Pyruvic acid	HMDB0000243	88.0144	0.926	0.827251	negative	-0.3037	0.76257	0.87807	0.94665
	N81	Hypoxanthine	HMDB0000157	136.036	0.876	0.966698	negative	0.60435	0.54824	0.78663	1.1393
	N815	12(S)-HETrE	HMDB0062747	322.25	8.414	1.19482	negative	-1.471	0.14732	0.74631	0.59913
	N82	Hypoxanthine	HMDB0000157	136.036	0.954	0.691907	negative	0.4777	0.63487	0.83565	1.1111
	N823	Uridine monophosphate (UMP)	HMDB0000288	324.036	0.92	1.18021	negative	-1.7929	0.078799	0.74631	0.57691
	N83	Hypoxanthine	HMDB0000157	136.037	1.17	0.576843	negative	-0.79724	0.42893	0.74631	0.83744
	N830	4-Dodecylbenzenesulfonic Acid	HMDB0031033	326.192	8.611	0.798801	negative	-0.41713	0.6783	0.86941	0.8686
	N841	Corchorifatty acid F	HMDB0035919	328.225	5.078	0.914712	negative	-0.88416	0.38068	0.74631	0.45493
	N843	Docosahexaenoic acid	HMDB0002183	328.24	9.817	1.40664	negative	-1.7433	0.087185	0.74631	0.59028
	N852	MG(0:0/16:0/0:0)	HMDB0011533	330.277	10.465	0.662988	negative	-1.0433	0.30163	0.74631	0.61493
	N860	Lysyl-Tryptophan	HMDB0028962	332.184	5.24	0.615266	negative	1.1517	0.25473	0.74631	9.591
	N862	Tryptophyl-Glutamate	HMDB0029082	333.132	3.153	1.01259	negative	-0.69349	0.49109	0.77344	0.7694
	N865	PGB2	HMDB0004236	334.214	6.85	1.24161	negative	-2.264	0.027774	0.74631	0.31101
	N873	12(R)-HPETE	HMDB0004692	336.23	7.905	1.11322	negative	-1.1452	0.25738	0.74631	0.42015
	N874	Prostaglandin B1	HMDB0002982	336.23	7.447	1.31718	negative	-1.4415	0.15543	0.74631	0.16453
	N875	Prostaglandin B1	HMDB0002982	336.23	6.622	1.2379	negative	-1.26	0.21329	0.74631	0.32693
	N876	Prostaglandin B1	HMDB0002982	336.23	7.685	1.22539	negative	-1.3148	0.19434	0.74631	0.28667
	N887	10,11-dihydro-leukotriene B4	HMDB0012504	338.246	7.668	1.1635	negative	-1.329	0.18964	0.74631	0.26752
	N891	Alpha-D-Glucose 1,6-bisphosphate	HMDB0003514	339.996	1.005	1.23997	negative	1.2162	0.2294	0.74631	1.5487
	N9	L-Lactic acid	HMDB0000190	90.0299	1.36	0.995866	negative	0.67284	0.50403	0.77344	1.1735
	N903	2,3-Dinor-6-keto-prostaglandin F1 a	HMDB0002277	342.203	8.885	1.39317	negative	-2.4774	0.01652	0.74631	0.67582
	N915	DG(8:0/0:0/8:0)	HMDB0092900	344.256	6.142	0.914302	negative	-0.82747	0.41175	0.74631	0.32004
	N937	Inosinic acid	HMDB0000175	348.047	0.992	0.911378	negative	-1.6788	0.099182	0.74631	0.54947
	N95	O-Phosphoethanolamine	HMDB0000224	141.018	0.926	1.05565	negative	-1.4839	0.14387	0.74631	0.69265
	N955	Prostaglandin E2	HMDB0001220	352.225	5.437	0.541498	negative	-0.76255	0.44917	0.75205	0.66416
	N960	Prostaglandin E1	HMDB0001442	354.24	6.01	1.20995	negative	-1.3144	0.19447	0.74631	0.17329
	N961	Prostaglandin E1	HMDB0001442	354.241	5.776	1.35373	negative	-1.5144	0.13597	0.74631	0.25214
	N962	Prostaglandin E1	HMDB0001442	354.241	6.371	1.24908	negative	-1.4095	0.16465	0.74631	0.26628
	N967	Prostaglandin F1a	HMDB0002685	356.256	6.026	1.06789	negative	-1.1556	0.25311	0.74631	0.30672
	N972	Leucyl-leucyl-norleucine	-	357.263	4.011	0.991381	negative	0.86935	0.38865	0.74631	1.645
	N984	5-Hydroxyomeprazole	HMDB0014010	361.11	4.424	0.890279	negative	-0.26662	0.79082	0.8961	0.90336
	N998	Testosterone sulfate	HMDB0002833	368.166	5.026	1.45785	negative	1.5339	0.13112	0.74631	1.3833
	P1000	5'-Methylthioadenosine	HMDB0001173	297.09	2.677	1.2553	positive	1.546	0.12816	0.74631	1.4166
	P1007	3-Dehydrosphinganine	HMDB0001480	299.283	7.637	0.982523	positive	0.14526	0.88506	0.94233	1.0571
	P1008	3-Dehydrosphinganine	HMDB0001480	299.283	9.518	1.21354	positive	0.86135	0.393	0.74631	1.2586
	P1015	Sphinganine	HMDB0000269	301.298	7.291	0.865331	positive	0.75537	0.45343	0.75451	1.093
	P1024	3-hydroxyoctanoyl carnitine	HMDB0061634	303.205	3.764	1.16769	positive	0.81049	0.42136	0.74631	1.2648
	P1028	Arachidonic acid	HMDB0001043	304.24	9.97	1.09365	positive	-1.4958	0.14074	0.74631	0.58768
	P103	Chlorobenzene	HMDB0041855	112.008	2.779	1.26286	positive	1.2795	0.2064	0.74631	1.0382
	P1033	Glutathione	HMDB0000125	307.084	0.889	0.751765	positive	0.48508	0.62966	0.83565	1.2826
	P105	2,3-Dihydroxy-2,4-cyclopentadien-1-one	HMDB0039437	112.016	5.415	0.8491	positive	-0.81731	0.41748	0.74631	0.82315
	P106	Uracil	HMDB0000300	112.028	1.158	0.59533	positive	-0.32415	0.74712	0.87674	0.92823
	P1085	Decanoylcarnitine	HMDB0000651	315.241	5.862	1.08015	positive	0.70984	0.48097	0.77344	1.2402
	P1098	Asparaginyl-Tryptophan	HMDB0028742	318.129	2.908	1.10172	positive	-0.67019	0.5057	0.77344	0.80268
	P111	Creatinine	HMDB0000562	113.059	0.867	0.864184	positive	0.17125	0.86469	0.93641	1.0199
	P1138	N,N-Dimethylsphingosine	HMDB0013645	327.314	10.425	1.17277	positive	0.59778	0.55258	0.78663	1.1459
	P1139	N,N-Dimethylsphingosine	HMDB0013645	327.314	8.435	0.502216	positive	0.064382	0.94891	0.96819	1.018
	P1143	Docosahexaenoic acid	HMDB0002183	328.24	9.807	1.22229	positive	-1.4335	0.15769	0.74631	0.62844
	P1148	Palmitoyl Serinol	HMDB0013654	329.293	7.857	0.396714	positive	-0.37685	0.70782	0.87119	0.83627
	P1154	MG(0:0/16:0/0:0)	HMDB0011533	330.277	9.949	0.25788	positive	-0.019905	0.9842	0.98926	0.99548
	P1155	MG(0:0/16:0/0:0)	HMDB0011533	330.277	10.097	1.11528	positive	1.0117	0.31636	0.74631	1.1408
	P116	1-Isothiocyanatobutane	HMDB0031328	115.046	7.743	0.784649	positive	-0.47885	0.63405	0.83565	0.70335
	P1188	Docosanamide	HMDB0000583	339.35	13.057	1.58892	positive	-2.2047	0.031922	0.74631	0.20617
	P119	L-Proline	HMDB0000162	115.064	0.781	1.08594	positive	0.45711	0.6495	0.84579	1.093
	P122	Guanidoacetic acid	HMDB0000128	117.054	0.846	0.582295	positive	0.63347	0.5292	0.7851	1.1739
	P123	Indole	HMDB0000738	117.058	6.203	0.519629	positive	0.35576	0.72346	0.8721	1.0802
	P1236	Adenosine monophosphate	HMDB0000045	347.063	0.88	0.978385	positive	-1.5984	0.11601	0.74631	0.69748
	P1264	Leu-Leu-Leu	HMDB0094648	357.263	3.891	0.955586	positive	0.82214	0.41475	0.74631	1.6051
	P1265	Leu-Leu-Leu	HMDB0094648	357.263	3.996	1.29763	positive	1.1103	0.27196	0.74631	1.7209
	P127	Benzeneacetonitrile	HMDB0034171	117.058	1.815	1.11017	positive	0.32289	0.74807	0.87674	1.0634
	P1279	MG(18:0/0:0/0:0)	HMDB0011131	358.308	10.751	1.32149	positive	1.9457	0.057104	0.74631	1.3118
	P128	Indole	HMDB0000738	117.058	3.123	0.741633	positive	0.92322	0.36016	0.74631	1.1651
	P1285	5-Hydroxyomeprazole	HMDB0014010	361.11	4.406	0.956425	positive	-0.3791	0.70615	0.87119	0.85968
	P1293	Cortisol	HMDB0000063	362.21	4.596	1.05911	positive	0.72309	0.47286	0.77186	1.2047
	P1299	N-Acetylmuramoyl-Ala	HMDB0060494	364.141	3.033	0.918526	positive	-0.30626	0.76063	0.87807	0.9028
	P130	Betaine	HMDB0000043	117.079	0.979	0.944029	positive	0.67993	0.49956	0.77344	1.1218
	P1306	3, 5-Tetradecadiencarnitine	HMDB0013331	367.273	6.725	1.23188	positive	1.7661	0.08325	0.74631	1.5157
	P131	Betaine	HMDB0000043	117.079	0.882	1.3718	positive	0.91358	0.36515	0.74631	1.1612
	P1313	trans-2-Tetradecenoylcarnitine	HMDB0013329	369.288	7.225	1.1636	positive	1.2143	0.23011	0.74631	1.3297
	P132	Valine	HMDB0000883	117.079	1.158	1.37506	positive	0.95904	0.34197	0.74631	1.2041
	P133	Valine	HMDB0000883	117.079	16.258	0.435641	positive	0.15948	0.87391	0.93699	1.0047
	P1344	Sphingosine 1-phosphate	HMDB0000277	379.249	7.337	1.14313	positive	0.60963	0.54476	0.78663	1.1567
	P1353	Sphinganine 1-phosphate	HMDB0001383	381.265	7.561	0.993073	positive	0.067409	0.94651	0.96819	1.0156
	P136	alpha-Methylstyrene	HMDB0059899	118.079	6.944	0.8473	positive	0.37431	0.70969	0.87119	1.0588
	P1364	Vitamin D3	HMDB0000876	384.339	11.053	0.893795	positive	-0.21442	0.83106	0.92235	0.88205
	P1365	Vitamin D3	HMDB0000876	384.339	12.212	1.03743	positive	-0.70957	0.48114	0.77344	0.78723
	P1366	Vitamin D3	HMDB0000876	384.339	11.976	0.852976	positive	0.40262	0.68888	0.86941	1.1562
	P1367	Vitamin D3	HMDB0000876	384.339	13.335	0.788608	positive	-0.61612	0.5405	0.78663	0.85948
	P1368	Vitamin D3	HMDB0000876	384.34	10.623	0.792912	positive	-0.895	0.37491	0.74631	0.4521
	P1372	MG(0:0/20:0/0:0)	HMDB0011542	386.333	8.759	0.664457	positive	1.2377	0.22138	0.74631	2.1089
	P139	L-Threonine	HMDB0000167	119.059	0.882	1.39297	positive	1.3127	0.19506	0.74631	1.1762
	P1393	9,12-Hexadecadienoylcarnitine	HMDB0013334	395.304	7.454	1.35984	positive	1.0073	0.31847	0.74631	1.3334
	P1405	4a-Methylzymosterol	HMDB0001217	398.355	12.449	0.689371	positive	-0.14191	0.8877	0.94233	0.90061
	P1409	L-Palmitoylcarnitine	HMDB0000222	399.335	8.496	0.96063	positive	-0.16194	0.87198	0.93699	0.94371
	P1412	7-Ketocholesterol	HMDB0000501	400.334	11.219	0.813232	positive	0.20929	0.83504	0.92327	1.1181
	P1414	7-Ketocholesterol	HMDB0000501	400.334	10.713	1.08754	positive	-0.50291	0.61715	0.82947	0.84026
	P147	N,N-Dimethylaniline	HMDB0001020	121.089	16.195	0.3624	positive	0.36672	0.71531	0.87119	1.0251
	P1476	Linoleyl carnitine	HMDB0006469	423.335	8.163	1.34638	positive	0.99726	0.32326	0.74631	1.2201
	P148	N,N-Dimethylaniline	HMDB0001020	121.089	0.884	1.0766	positive	-0.16942	0.86612	0.93641	0.98268
	P1480	Oleoylcarnitine	HMDB0005065	425.351	8.657	1.09568	positive	0.3926	0.69622	0.86941	1.0976
	P1481	Oleoylcarnitine	HMDB0005065	425.351	9	0.858332	positive	-0.64858	0.51947	0.77457	0.69444
	P1482	Tetracosanoylglycine	HMDB0013310	425.387	12.889	0.765175	positive	-0.13787	0.89087	0.94233	0.96345
	P153	4-Hydroxybenzaldehyde	HMDB0011718	122.037	1.162	1.27764	positive	0.83538	0.40732	0.74631	1.1637
	P154	Niacinamide	HMDB0001406	122.047	1.16	1.24487	positive	1.01	0.31716	0.74631	1.3273
	P155	Niacinamide	HMDB0001406	122.048	0.974	1.00318	positive	0.18087	0.85717	0.93335	1.0417
	P1559	13'-Hydroxy-alpha-tocopherol	HMDB0012559	446.375	9.204	0.801678	positive	-0.76302	0.4489	0.75205	0.95139
	P156	Niacinamide	HMDB0001406	122.048	1.041	1.22189	positive	1.202	0.23483	0.74631	1.3576
	P1568	Glycoursodeoxycholic acid	HMDB0000708	449.314	6.229	0.683196	positive	0.86993	0.38834	0.74631	2.4313
	P157	Niacinamide	HMDB0001406	122.048	1.159	1.17439	positive	0.39112	0.69731	0.86941	1.0987
	P1575	LysoPE(0:0/16:1)	HMDB0011474	451.27	8.137	0.903547	positive	-0.23905	0.81201	0.91157	0.88039
	P1576	LysoPE(0:0/16:1)	HMDB0011474	451.27	7.628	1.23135	positive	-1.287	0.20379	0.74631	0.67326
	P1577	LysoPE(0:0/16:1)	HMDB0011474	451.27	7.456	1.22651	positive	-1.267	0.2108	0.74631	0.73784
	P158	Niacinamide	HMDB0001406	122.048	0.898	1.0965	positive	1.3677	0.17729	0.74631	1.5387
	P159	Nicotinic acid	HMDB0001488	123.034	16.301	0.569554	positive	-1.4201	0.16156	0.74631	0.93472
	P1590	LysoPE(0:0/16:0)	HMDB0011473	453.286	8.141	1.45687	positive	-1.6985	0.095395	0.74631	0.57887
	P1633	LysoPC(14:0/0:0)	HMDB0010379	467.302	7.516	1.05367	positive	-0.60835	0.5456	0.78663	0.87367
	P1673	LysoPC(15:0)	HMDB0010381	481.317	9.323	1.04588	positive	-1.2735	0.20852	0.74631	0.66894
	P1674	LysoPC(15:0)	HMDB0010381	481.317	9.124	1.04422	positive	-1.2755	0.20779	0.74631	0.65794
	P1675	LysoPC(15:0)	HMDB0010381	481.317	8.032	0.972303	positive	-0.42388	0.6734	0.86728	0.91399
	P168	Taurine	HMDB0000251	125.015	0.874	1.19615	positive	-1.919	0.060479	0.74631	0.60308
	P170	Ethylphosphate	HMDB0012228	126.008	4.315	1.33246	positive	1.5004	0.13957	0.74631	1.0725
	P173	1-Methyl-4-nitroimidazole	HMDB0060659	127.038	2.311	0.902515	positive	-0.94467	0.3492	0.74631	0.27068
	P1759	Taurocholic acid	HMDB0000036	515.292	4.822	0.462333	positive	-0.47897	0.63397	0.83565	0.63164
	P176	Dihydrothymine	HMDB0000079	128.059	0.866	1.03041	positive	0.85486	0.39655	0.74631	1.2315
	P1765	LysoPC(18:3)	HMDB0010387	517.317	5.926	0.88638	positive	-0.81929	0.41636	0.74631	0.31588
	P177	Dihydrothymine	HMDB0000079	128.059	1.296	1.18635	positive	0.5699	0.5712	0.80139	1.1099
	P1790	LysoPE(22:6/0:0)	HMDB0011526	525.286	7.878	1.08045	positive	0.47206	0.63886	0.83565	1.1074
	P180	Pyroglutamic acid	HMDB0000267	129.043	0.894	1.05727	positive	0.56428	0.57499	0.80139	1.0697
	P181	Pyroglutamic acid	HMDB0000267	129.043	1.16	0.987113	positive	-0.30353	0.7627	0.87807	0.92092
	P183	Pipecolic acid	HMDB0000070	129.079	0.859	1.31056	positive	1.4845	0.1437	0.74631	1.2532
	P1836	Ceramide (d18:1/16:0)	HMDB0004949	537.513	14.218	0.727339	positive	-0.22896	0.81979	0.91582	0.9428
	P184	Pipecolic acid	HMDB0000070	129.079	0.776	1.23306	positive	0.735	0.46564	0.76219	1.1272
	P185	Pipecolic acid	HMDB0000070	129.079	0.911	0.977775	positive	0.75516	0.45356	0.75451	1.1722
	P186	Pipecolic acid	HMDB0000070	129.079	1.159	0.934156	positive	0.32312	0.7479	0.87674	1.0961
	P1917	Cer(d18:0/18:0)	HMDB0011761	567.56	16.1	0.263785	positive	-0.80072	0.42694	0.74631	0.47261
	P192	2,2-dichloro-1,1-ethanediol	METPA1168	129.959	1.641	0.339683	positive	0.93295	0.35516	0.74631	1.2239
	P194	Creatine	HMDB0000064	131.07	0.962	0.225978	positive	-0.21164	0.83322	0.923	0.93606
	P1945	Bilirubin	HMDB0000054	584.263	10.816	1.06138	positive	-1.8423	0.071132	0.74631	0.23252
	P195	Creatine	HMDB0000064	131.07	0.867	1.14679	positive	0.44971	0.65479	0.84976	1.0681
	P197	L-Isoleucine	HMDB0000172	131.095	0.905	2.01274	positive	2.7411	0.0083746	0.74631	1.4322
	P1984	Oxidized glutathione	HMDB0003337	612.152	1.159	0.951254	positive	0.62078	0.53746	0.78663	1.199
	P1985	Oxidized glutathione	HMDB0003337	612.153	0.884	0.567384	positive	0.39491	0.69452	0.86941	1.0954
	P199	Leucinic acid	HMDB0000665	132.079	2.904	0.82055	positive	-0.15293	0.87904	0.94	0.93732
	P200	Leucinic acid	HMDB0000665	132.079	3.035	0.626255	positive	0.30014	0.76527	0.87931	1.1346
	P201	Ornithine	HMDB0000214	132.09	0.776	1.06086	positive	0.11236	0.91097	0.95629	1.026
	P2030	DG(18:1/20:5/0:0)	HMDB0007201	640.507	13.72	1.12917	positive	1.1093	0.27242	0.74631	2.7051
	P204	L-Aspartic acid	HMDB0000191	133.038	0.902	1.1358	positive	0.95572	0.34363	0.74631	1.1103
	P2041	Cer(d18:1/24:1)	HMDB0004953	647.622	14.539	0.345593	positive	-0.47672	0.63556	0.83565	0.89234
	P207	Tranylcypromine	HMDB0014890	133.089	3.659	0.234327	positive	0.1025	0.91875	0.95629	1.0397
	P2079	SM(d18:1/14:0)	HMDB0012097	674.537	10.391	0.661108	positive	-1.1319	0.26289	0.74631	0.76245
	P2126	Glucosylceramide (d18:1/16:0)	HMDB0004971	699.566	12.999	1.16397	positive	0.87626	0.38492	0.74631	1.3216
	P2131	Palmitoyl sphingomyelin	HMDB0061712	702.568	11.039	0.846812	positive	-1.8077	0.076434	0.74631	0.32855
	P2137	PC(14:0/16:0)	HMDB0007869	705.532	16.28	0.750832	positive	-0.90483	0.36973	0.74631	0.52478
	P214	Adenine	HMDB0000034	135.055	16.247	0.86234	positive	-0.68735	0.49491	0.77344	0.87533
	P2149	PE(14:0/20:2)	HMDB0008835	715.516	11.142	0.818606	positive	1.1652	0.24926	0.74631	1.638
	P215	Adenine	HMDB0000034	135.055	1.16	1.1906	positive	-0.69108	0.49259	0.77344	0.826
	P2150	PE(14:0/20:2)	HMDB0008835	715.516	16.271	1.01223	positive	0.97648	0.33335	0.74631	1.1882
	P2173	PE(18:1/P-18:1)	HMDB0009049	727.551	10.798	0.526809	positive	-1.0149	0.31486	0.74631	0.83504
	P2174	PC(P-16:0/P-18:1)	HMDB0011235	727.582	11.677	0.509614	positive	0.56117	0.57709	0.80139	1.4048
	P2179	PC(16:0/16:0)	HMDB0000564	733.562	10.052	0.488076	positive	-0.38775	0.69978	0.87064	0.89808
	P218	N-Acetylarylamine	HMDB0001250	135.069	3.004	0.42993	positive	-0.62806	0.53271	0.78663	0.94501
	P2180	PC(16:0/16:0)	HMDB0000564	733.563	16.275	0.317073	positive	0.36973	0.71309	0.87119	1.0524
	P2181	PC(16:0/16:0)	HMDB0000564	733.563	10.633	0.731042	positive	0.90953	0.36727	0.74631	1.2894
	P2191	PE(18:3/18:0)	HMDB0009123	741.532	11.07	1.31672	positive	1.5814	0.11985	0.74631	1.6041
	P2195	PC(15:0/18:2)	HMDB0007940	743.547	10.997	0.854459	positive	1.1692	0.24765	0.74631	1.4509
	P22	Piperidine	HMDB0034301	85.0893	3.386	0.415524	positive	0.47745	0.63504	0.83565	1.325
	P2207	PE(O-18:1/20:4)	HMDB0005779	751.552	16.269	0.406369	positive	-0.036872	0.97073	0.98077	0.99511
	P2210	PC(14:0/20:2)	HMDB0007880	757.562	10.977	0.430581	positive	-0.7924	0.43173	0.7485	0.77357
	P2211	PC(14:0/20:2)	HMDB0007880	757.562	10.623	0.552696	positive	0.86506	0.39098	0.74631	1.3733
	P2212	PC(14:0/20:2)	HMDB0007880	757.563	16.276	0.683712	positive	-1.2122	0.2309	0.74631	0.85187
	P2213	PC(14:0/20:2)	HMDB0007880	757.563	10.091	0.310009	positive	-0.26492	0.79212	0.8961	0.89306
	P2214	PC(14:0/20:2)	HMDB0007880	757.563	10.714	0.354988	positive	-0.68148	0.49859	0.77344	0.74822
	P2219	PC(14:0/20:1)	HMDB0007879	759.574	10.548	0.842155	positive	1.6611	0.10272	0.74631	2.3196
	P2239	PC(o-16:0/20:4)	HMDB0013407	767.582	10.533	0.318478	positive	0.16681	0.86817	0.93641	1.0288
	P224	Hypoxanthine	HMDB0000157	136.039	1.149	0.804144	positive	-0.88249	0.38157	0.74631	0.83953
	P225	Hypoxanthine	HMDB0000157	136.039	0.89	0.762124	positive	-0.81628	0.41807	0.74631	0.8181
	P2252	PC(18:3/18:2)	HMDB0008171	779.545	10.674	0.626538	positive	0.1978	0.84397	0.92512	1.0575
	P2253	PC(18:318:2)	-	779.545	10.551	1.00137	positive	1.4966	0.14053	0.74631	1.6143
	P226	2-Acetyl-3-methylpyrazine	HMDB0030001	136.064	0.842	0.552821	positive	0.82463	0.41335	0.74631	1.1691
	P227	Betahistine	HMDB0015644	136.1	3.071	0.882895	positive	-1.0647	0.29195	0.74631	0.19051
	P2279	PC(18:1/18:1)	HMDB0000593	785.593	10.944	0.249106	positive	-1.0155	0.31456	0.74631	0.80548
	P2280	PC(18:1/18:1)	HMDB0000593	785.593	10.51	0.751089	positive	-1.0476	0.29965	0.74631	0.72784
	P2284	PC(18:1/18:1)	HMDB0000593	785.594	9.967	0.259884	positive	0.081353	0.93547	0.96463	1.0144
	P2286	PS(18:1/18:1)	HMDB0012390	787.537	8.316	0.494604	positive	-0.67417	0.50319	0.77344	0.88988
	P2287	PS(18:1/18:1)	HMDB0012390	787.537	9.631	0.543948	positive	-0.56871	0.572	0.80139	0.92175
	P2288	PS(18:1/18:1)	HMDB0012390	787.537	16.272	0.843443	positive	-0.8452	0.40187	0.74631	0.53963
	P2330	PC(20:3/18:1)	HMDB0008367	809.593	10.591	1.6193	positive	2.2875	0.026268	0.74631	1.9956
	P237	3-Hydroxybenzoic acid	HMDB0002466	138.032	7.025	1.53516	positive	-1.9288	0.059228	0.74631	0.33263
	P238	Urocanic acid	HMDB0000301	138.043	16.235	0.483253	positive	0.61493	0.54128	0.78663	1.0284
	P2382	Galabiosylceramide (d18:1/16:0)	HMDB0004833	861.619	12.693	1.68997	positive	1.7644	0.083543	0.74631	1.6738
	P239	Trans-urocanate	HMDB0062562	138.043	0.883	0.330382	positive	0.50774	0.61378	0.82875	1.2792
	P2405	TG(18:1/18:2/20:4)	HMDB0005462	904.75	13.742	0.136373	positive	-0.21586	0.82994	0.92235	0.94803
	P260	Proline betaine	HMDB0004827	143.095	0.957	0.972363	positive	1.598	0.1161	0.74631	1.6742
	P263	3-Hexenedioic acid	HMDB0000393	144.042	1.156	0.848952	positive	-0.33122	0.74181	0.87641	0.93357
	P275	Spermidine	HMDB0001257	145.158	0.775	1.08806	positive	-0.0099232	0.99212	0.99212	0.99763
	P277	D-Glutamine	HMDB0003423	146.069	0.882	1.31319	positive	1.3176	0.19343	0.74631	1.146
	P278	L-Lysine	HMDB0000182	146.106	0.775	1.05752	positive	0.54905	0.58532	0.80139	1.1011
	P281	Thiomorpholine 3-carboxylate	HMDB0059611	147.035	0.889	0.715407	positive	0.66081	0.51165	0.77344	1.425
	P284	L-Glutamic acid	HMDB0000148	147.053	0.888	0.946671	positive	0.64304	0.52302	0.7779	1.0716
	P294	L-Methionine	HMDB0000696	149.051	1.002	0.908331	positive	0.55713	0.57983	0.80139	1.1207
	P295	L-Methionine	HMDB0000696	149.051	3.597	1.09935	positive	-1.5766	0.12095	0.74631	0.54305
	P297	Methamphetamine	HMDB0015517	149.12	16.2	0.44834	positive	0.37577	0.70862	0.87119	1.019
	P305	Xanthine	HMDB0000292	152.034	1.161	0.897851	positive	-1.1672	0.24845	0.74631	0.73523
	P307	2-Hexylfuran	HMDB0039816	152.12	7.617	0.502541	positive	-1.6268	0.10982	0.74631	0.86615
	P315	Diethylphosphate	HMDB0012209	154.038	2.778	1.23671	positive	1.2502	0.21683	0.74631	1.0423
	P316	Diethylphosphate	HMDB0012209	154.04	4.315	1.41295	positive	1.7533	0.085451	0.74631	1.0864
	P32	L-Alanine	HMDB0000161	89.0483	0.871	1.55692	positive	1.728	0.089921	0.74631	1.2525
	P323	N-Methylethanolaminium phosphate	HMDB0060173	155.035	0.88	1.16298	positive	0.98509	0.32914	0.74631	1.2583
	P324	L-Histidine	HMDB0000177	155.07	0.783	1.07279	positive	0.84266	0.40328	0.74631	1.103
	P338	Pregabalin	HMDB0014375	159.126	0.878	0.921556	positive	-0.026372	0.97906	0.98579	0.99328
	P339	Pregabalin	HMDB0014375	159.126	1.16	0.968921	positive	0.031701	0.97483	0.98322	1.0089
	P343	2-Indolecarboxylic acid	HMDB0002285	161.048	5.319	1.02004	positive	1.0961	0.2781	0.74631	1.1968
	P345	N-Acetylthreonine	HMDB0062557	161.069	0.912	0.904194	positive	-0.60381	0.54859	0.78663	0.77428
	P346	Aminoadipic acid	HMDB0000510	161.069	1.158	0.968599	positive	-0.66568	0.50856	0.77344	0.71912
	P347	L-Carnitine	HMDB0000062	161.105	0.944	0.887996	positive	0.17339	0.86302	0.93641	1.042
	P348	L-Carnitine	HMDB0000062	161.105	0.856	1.33852	positive	1.5578	0.12535	0.74631	1.2776
	P357	3-Methylsulfinylpropyl isothiocyanate	HMDB0006095	163.013	3.527	0.622901	positive	0.69821	0.48816	0.77344	2.1609
	P365	2-Hydroxycinnamic acid	HMDB0002641	164.048	1.162	1.30928	positive	0.89412	0.37538	0.74631	1.1759
	P370	L-Phenylalanine	HMDB0000159	165.077	0.912	0.742335	positive	1.2693	0.21	0.74631	2.022
	P372	L-Phenylalanine	HMDB0000159	165.079	3.017	0.644897	positive	0.47247	0.63857	0.83565	1.1141
	P374	L-Phenylalanine	HMDB0000159	165.079	1.765	1.23674	positive	0.96682	0.33811	0.74631	1.2096
	P376	L-Phenylalanine	HMDB0000159	165.079	0.942	1.26008	positive	1.2103	0.23164	0.74631	1.1871
	P387	Uric acid	HMDB0000289	168.029	0.981	1.5098	positive	2.5243	0.014683	0.74631	1.4067
	P389	Homogentisic acid	HMDB0000130	168.042	4.398	0.458488	positive	0.068272	0.94583	0.96819	1.0467
	P391	2,3-Diaminosalicylic acid	HMDB0013159	168.054	1.581	0.74167	positive	0.65146	0.51762	0.77457	1.2396
	P397	Levetiracetam	HMDB0015333	170.106	3.538	0.851578	positive	0.98377	0.32978	0.74631	2.3298
	P400	Metronidazole	HMDB0015052	171.065	2.222	0.914076	positive	-0.97022	0.33643	0.74631	0.0039373
	P403	Gabapentin	HMDB0005015	171.126	3.599	0.912553	positive	2.1468	0.036492	0.74631	1.2493
	P408	Glycylproline	HMDB0000721	172.085	2.862	0.949468	positive	0.89004	0.37754	0.74631	1.6621
	P412	Quinaldic acid	HMDB0000842	173.048	5.415	0.90984	positive	-0.91954	0.36206	0.74631	0.3296
	P413	Quinaldic acid	HMDB0000842	173.048	3.062	0.582641	positive	-0.46572	0.64336	0.83966	0.9384
	P420	N-Acetylornithine	HMDB0003357	174.101	0.877	0.675244	positive	-0.91843	0.36263	0.74631	0.17877
	P421	L-Arginine	HMDB0000517	174.112	0.832	0.612738	positive	-0.017398	0.98619	0.98956	0.99671
	P422	1,2,3,4,Tetrahydro-1,5,7-trimethylnapthalene	HMDB0059696	174.141	5.878	0.598786	positive	-1.1591	0.2517	0.74631	0.92175
	P426	Indoleacetic acid	HMDB0000197	175.064	4.1	0.727505	positive	-0.55093	0.58404	0.80139	0.84211
	P431	Herniarin	HMDB0029758	176.047	6.299	0.982327	positive	-1.1679	0.24819	0.74631	0.63069
	P432	Allantoic acid	HMDB0001209	176.054	0.79	1.22453	positive	-0.50541	0.61541	0.82903	0.90835
	P446	3-Succinoylpyridine	HMDB0000992	179.058	4.425	1.25807	positive	1.3642	0.17838	0.74631	1.3241
	P447	Methyl n-formylanthranilate	HMDB0032398	179.059	4.316	1.31863	positive	1.3642	0.17838	0.74631	1.3178
	P448	Hippuric acid	HMDB0000714	179.059	3.123	0.941598	positive	1.4066	0.16548	0.74631	1.6348
	P455	D-Glucose	HMDB0000122	180.065	2.601	0.274804	positive	1.0064	0.31887	0.74631	2.5929
	P464	L-Tyrosine	HMDB0000158	181.071	0.754	0.68087	positive	-0.57764	0.566	0.80115	0.87394
	P465	L-Tyrosine	HMDB0000158	181.074	1.16	1.30276	positive	0.8893	0.37794	0.74631	1.1759
	P466	L-Tyrosine	HMDB0000158	181.074	0.885	0.917958	positive	0.87344	0.38644	0.74631	1.0955
	P475	2-Hydroxyfluorene	HMDB0013163	182.071	3.036	0.939312	positive	-0.37649	0.70809	0.87119	0.88187
	P476	2-Hydroxyfluorene	HMDB0013163	182.071	4.315	1.35641	positive	1.6088	0.11371	0.74631	1.0788
	P477	2-Hydroxyfluorene	HMDB0013163	182.073	6.769	0.870923	positive	-0.80813	0.4227	0.74631	0.96474
	P5	Trimethylamine N-oxide	HMDB0000925	75.0685	0.86	1.71709	positive	-2.3631	0.021895	0.74631	0.12897
	P507	Detomidine	HMDB0041872	186.116	2.983	0.503507	positive	0.9322	0.35554	0.74631	5.633
	P508	Detomidine	HMDB0041872	186.116	0.917	0.499424	positive	0.99576	0.32398	0.74631	3.9459
	P514	Indoleacrylic acid	HMDB0000734	187.063	2.715	1.23999	positive	0.40683	0.68581	0.86941	1.0841
	P515	Indoleacrylic acid	HMDB0000734	187.063	2.618	0.800842	positive	0.3488	0.72865	0.8721	1.1093
	P516	Indoleacrylic acid	HMDB0000734	187.064	2.94	1.00605	positive	0.65031	0.51836	0.77457	1.2602
	P519	N8-Acetylspermidine	HMDB0002189	187.169	0.826	1.17907	positive	1.1217	0.26716	0.74631	1.4377
	P525	Glycylleucine	HMDB0000759	188.116	2.553	0.290232	positive	-0.53665	0.5938	0.81041	0.69727
	P526	Glycylleucine	HMDB0000759	188.116	1.234	0.31775	positive	-0.36415	0.71722	0.87119	0.74696
	P528	N6,N6,N6-Trimethyl-L-lysine	HMDB0001325	188.153	0.81	1.11162	positive	0.8082	0.42266	0.74631	1.1762
	P542	Methyl hippurate	HMDB0000859	193.074	5.319	1.12053	positive	1.2819	0.20556	0.74631	1.2311
	P543	Methyl hippurate	HMDB0000859	193.074	5.436	0.903705	positive	1.1013	0.27585	0.74631	1.1866
	P544	Caffeine	HMDB0001847	194.081	3.002	0.244004	positive	0.60692	0.54655	0.78663	1.7981
	P546	Ethyl 4-ethoxybenzoate	HMDB0059898	194.094	7.025	1.50642	positive	-1.8983	0.063214	0.74631	0.34274
	P563	N-(4-hydroxyphenyl)ethoxycarbothioamide	HMDB0033179	197.051	3.833	0.848519	positive	-0.59706	0.55306	0.78663	0.76827
	P57	Cyclohexylamine	HMDB0031404	99.1053	16.264	0.29969	positive	-0.66739	0.50748	0.77344	0.92362
	P581	D-Erythrose 4-phosphate	HMDB0001321	200.009	0.965	0.762355	positive	0.5652	0.57437	0.80139	1.2262
	P589	Thiabendazole	HMDB0014868	201.037	4.089	0.9396	positive	1.4316	0.15823	0.74631	1.0464
	P59	Glutaral	HMDB0029599	100.053	0.882	1.41128	positive	0.88493	0.38027	0.74631	1.154
	P590	Thiabendazole	HMDB0014868	201.037	2.777	1.27975	positive	1.3561	0.18093	0.74631	1.0413
	P598	Alanyl-Leucine	HMDB0028691	202.132	2.531	0.264038	positive	0.13935	0.88971	0.94233	1.11
	P601	Spermine	HMDB0001256	202.216	0.781	1.05171	positive	0.52397	0.60252	0.81816	1.3043
	P605	L-Acetylcarnitine	HMDB0000201	203.116	1.161	1.15189	positive	0.2862	0.77586	0.88454	1.0557
	P606	L-Acetylcarnitine	HMDB0000201	203.116	0.884	1.09105	positive	0.88132	0.3822	0.74631	1.1511
	P613	L-Tryptophan	HMDB0000929	204.09	2.609	1.17421	positive	0.097691	0.92255	0.95844	1.0208
	P614	Valyl-Serine	HMDB0029136	204.111	1.192	0.458037	positive	-0.6046	0.54807	0.78663	0.54151
	P626	L-Kynurenine	HMDB0000684	208.085	1.76	1.1668	positive	0.97234	0.33538	0.74631	1.2779
	P627	gamma-Asarone	HMDB0029872	208.11	6.548	1.48745	positive	1.6146	0.11246	0.74631	1.2929
	P63	Triethylamine	HMDB0032539	101.121	16.209	0.293928	positive	0.091121	0.92775	0.96053	1.0049
	P64	Triethylamine	HMDB0032539	101.121	16.094	0.715529	positive	-0.65802	0.51343	0.77344	0.91311
	P648	Sulfacetamide	HMDB0014772	214.041	1.575	0.544786	positive	0.34847	0.7289	0.8721	1.1746
	P650	Valyl-Proline	HMDB0029135	214.132	1.388	1.09719	positive	0.10641	0.91567	0.95629	1.025
	P651	Glycerylphosphorylethanolamine	HMDB0000114	215.056	0.903	0.673417	positive	-0.7994	0.42769	0.74631	0.86317
	P664	Valyl-Valine	HMDB0029140	216.148	1.688	1.09242	positive	1.0073	0.31845	0.74631	1.4711
	P666	Propionylcarnitine	HMDB0000824	217.132	1.404	1.08768	positive	0.24349	0.80858	0.90946	1.0623
	P673	Isoleucyl-Serine	HMDB0028916	218.127	2.306	1.20584	positive	1.3964	0.16852	0.74631	2.4666
	P679	Asparaginyl-Serine	HMDB0028740	219.09	3.689	0.884956	positive	-0.15023	0.88116	0.94055	0.9355
	P689	Prilocaine	HMDB0014888	220.158	3.42	0.7806	positive	1.5179	0.13509	0.74631	5.2112
	P700	L-Cystathionine	HMDB0000099	222.068	0.898	1.30151	positive	0.79884	0.42802	0.74631	1.0774
	P711	Furazolidone	HMDB0014752	225.038	0.882	0.747744	positive	0.80788	0.42284	0.74631	1.155
	P72	gamma-Aminobutyric acid	HMDB0000112	103.064	0.872	1.24052	positive	0.8013	0.4266	0.74631	1.1313
	P725	Isoleucylproline	HMDB0011174	228.148	1.165	1.3069	positive	1.0048	0.31964	0.74631	1.3192
	P728	Ergothioneine	HMDB0003045	229.089	0.969	0.940377	positive	1.2927	0.20184	0.74631	1.5258
	P733	Leucyl-Valine	HMDB0028942	230.163	2.933	1.10367	positive	1.6067	0.11418	0.74631	1.7384
	P734	Asparaginyl-Valine	HMDB0028744	231.122	1.215	0.657182	positive	-0.88132	0.3822	0.74631	0.22517
	P735	Isobutyryl-L-carnitine	HMDB0000736	231.147	2.637	0.962572	positive	1.0524	0.29748	0.74631	1.4665
	P737	Leucyl-Threonine	HMDB0028939	232.143	3.224	0.884284	positive	0.78373	0.43675	0.75055	1.6482
	P747	N'-Formylkynurenine	HMDB0001200	236.08	1.229	1.03618	positive	-0.97346	0.33483	0.74631	0.307
	P754	1-(2,4,5-Trimethoxyphenyl)-1,2-propanedione	HMDB0031771	238.084	3.701	0.827035	positive	1.0039	0.32005	0.74631	1.4653
	P756	Hexadecenal	HMDB0060482	238.23	10.095	1.0899	positive	0.95717	0.34291	0.74631	1.1249
	P757	Pirbuterol	HMDB0015407	240.148	1.172	1.27914	positive	0.90401	0.37016	0.74631	1.2424
	P758	Pirbuterol	HMDB0015407	240.148	0.883	1.22124	positive	1.1514	0.25483	0.74631	1.2863
	P773	N-Undecanoylglycine	HMDB0013286	243.184	5.206	0.435476	positive	-0.37163	0.71168	0.87119	0.9834
	P779	Leucyl-Isoleucine	HMDB0028932	244.179	3.193	1.17692	positive	1.2577	0.21413	0.74631	1.9561
	P780	Leucyl-Isoleucine	HMDB0028932	244.179	3.294	1.15806	positive	1.1203	0.26772	0.74631	1.6165
	P781	N1-Acetylspermine	HMDB0001186	244.227	0.789	1.12667	positive	0.55344	0.58234	0.80139	1.4517
	P782	Alanyl-Arginine	HMDB0028681	245.145	5.528	1.0131	positive	0.49088	0.62558	0.83565	1.1034
	P787	Prolyl-Methionine	HMDB0029023	246.104	3.617	0.955478	positive	1.2439	0.21911	0.74631	1.2295
	P788	Aspartyl-Leucine	HMDB0028757	246.122	2.624	1.17871	positive	0.69013	0.49318	0.77344	1.1562
	P79	O-Toluidine	HMDB0041965	107.074	16.21	0.547696	positive	1.2682	0.21038	0.74631	1.0801
	P794	(R)-3-hydroxybutyrylcarnitine	HMDB0062735	247.142	0.889	0.711943	positive	1.1242	0.26608	0.74631	1.2827
	P796	Lysyl-Threonine	HMDB0028961	247.158	3.931	0.718095	positive	-1.4061	0.16565	0.74631	0.0312
	P807	Alanyl-Tyrosine	HMDB0028699	252.111	2.696	0.621614	positive	0.83028	0.41017	0.74631	1.3915
	P813	Daidzein	HMDB0003312	254.058	4.222	1.52575	positive	-2.7563	0.0080431	0.74631	0.34624
	P831	Hexanoylcarnitine	HMDB0000705	259.179	3.724	0.992501	positive	0.53538	0.59467	0.81041	1.1352
	P838	gamma-Glutamylisoleucine	HMDB0011170	260.137	2.883	1.08957	positive	0.04781	0.96205	0.97537	1.0129
	P864	Adenosine	HMDB0000050	267.097	1.161	1.20494	positive	-0.8099	0.42169	0.74631	0.79407
	P868	Inosine	HMDB0000195	268.081	1.156	0.903276	positive	-0.94898	0.34702	0.74631	0.8031
	P872	Asparaginyl-Histidine	HMDB0028733	269.113	0.769	0.687238	positive	-0.92338	0.36007	0.74631	0.28751
	P898	Stearidonic acid	HMDB0006547	276.209	8.323	0.948866	positive	-0.87678	0.38464	0.74631	0.35628
	P907	Prolyl-Tyrosine	HMDB0029029	278.127	0.976	0.91074	positive	-0.93388	0.35468	0.74631	0.11217
	P908	Prolyl-Tyrosine	HMDB0029029	278.127	1.177	0.900703	positive	-0.87632	0.38489	0.74631	0.25622
	P910	Isoleucyl-Phenylalanine	HMDB0028914	278.163	3.48	0.341386	positive	-0.17918	0.85849	0.93335	0.91652
	P912	Gamma-Linolenic acid	HMDB0003073	278.225	8.02	0.984875	positive	-0.8587	0.39445	0.74631	0.50368
	P916	Linoleamide	HMDB0062656	279.256	9.458	0.356224	positive	-0.14193	0.88769	0.94233	0.96683
	P920	Tyrosyl-Valine	HMDB0029118	280.145	9.326	1.18905	positive	-1.5072	0.13782	0.74631	0.65993
	P922	Oleamide	HMDB0002117	281.272	10.203	1.27544	positive	-2.0199	0.048556	0.74631	0.61229
	P948	N1,N12-Diacetylspermine	HMDB0002172	286.237	0.843	1.31383	positive	0.98259	0.33036	0.74631	1.6778
	P952	Leucyl-Arginine	HMDB0028923	287.196	1.559	1.18832	positive	1.0394	0.30345	0.74631	1.7197
	P97	Histamine	HMDB0000870	111.08	0.776	0.516017	positive	-0.19301	0.8477	0.92512	0.96247
	P976	Terbinafine	HMDB0014995	291.199	5.653	0.25726	positive	0.82196	0.41485	0.74631	2.0186
	P984	gamma-Glutamylphenylalanine	HMDB0000594	294.122	2.973	1.22201	positive	-0.91447	0.36469	0.74631	0.77148
	P985	9-HOTE	HMDB0010224	294.22	8.431	0.947803	positive	-0.8873	0.379	0.74631	0.31212
	P986	9-HOTE	HMDB0010224	294.22	5.335	0.91918	positive	-0.84516	0.40189	0.74631	0.48963
	P987	9-HOTE	HMDB0010224	294.22	8.201	0.947673	positive	-0.86397	0.39157	0.74631	0.3774
	P988	9-HOTE	HMDB0010224	294.22	7.068	0.943519	positive	-0.97078	0.33615	0.74631	0.20869
	P989	9-HOTE	HMDB0010224	294.22	7.193	0.942565	positive	-1.0451	0.30082	0.74631	0.38964
	P990	9-HOTE	HMDB0010224	294.22	6.649	0.910592	positive	-0.92946	0.35694	0.74631	0.49821
	P991	9-HOTE	HMDB0010224	294.22	8.328	0.962305	positive	-0.915	0.36442	0.74631	0.33148

## Sheet: Sheet2
	The differential genes identified in the transcriptome analysis for TCGA cohort
	ID	FC	PValue	FDR	Classification
	ABCC8	5.84445	2.0108e-06	6.68407e-05	ABC Transporter
	ABCA9	1.0926	0.00641577	0.0483915	ABC Transporter
	ABCA6	1.16005	0.0042642	0.035815	ABC Transporter
	ABCG5	4.16233	0.00368407	0.0324985	ABC Transporter
	SDS	1.45799	0.00421721	0.0355501	Amino Acid
	ASRGL1	1.36386	0.000472058	0.00668834	Amino Acid
	CHI3L2	3.02011	0.000726116	0.00945182	Aminosugar
	GCH1	1.80134	3.95788e-07	1.58729e-05	BH4
	QDPR	2.00076	4.46656e-09	2.70623e-07	BH4
	G6PC	17.2828	0.000270951	0.00428382	Carbohydrate Storage
	FBP2	20.7108	1.11356e-05	0.000300742	Carbohydrate Storage
	COX6B2	2.16253	0.000505889	0.00704838	Complex IV
	GATM	3.00159	0.00116092	0.0135165	Creatine
	CES1	2.87422	0.00199797	0.0203318	Detox
	FMO2	1.51677	0.00384062	0.0335096	Detox
	UGT2B10	9.40722	0.0045204	0.037505	Detox
	UGT2B15	4.01048	0.00497645	0.0401495	Detox
	DHDH	1.5137	0.000432291	0.0062206	Detox
	CYP4A11	4.93872	0.00416143	0.0352411	Fatty Acid
	CYP4F3	3.73169	2.89887e-08	1.46687e-06	Fatty Acid
	MTTP	24.3112	0.000165542	0.00288469	Fatty Acid
	ELOVL4	2.73393	1.22211e-08	6.75976e-07	Fatty Acid
	ACSL6	2.40188	0.000263413	0.00419707	Fatty Acid
	ACOXL	4.11432	4.01306e-10	2.94488e-08	Fatty Acid
	ACSBG2	12.5091	1.61403e-24	1.06174e-21	Fatty Acid
	LIPJ	3.88245	9.71214e-06	0.000265412	Fatty Acid
	GLS	1.21792	2.33932e-10	1.80284e-08	Glutamate
	GPX3	4.32919	4.53004e-10	3.29797e-08	Glutathione
	GSTA2	6.8116	0.00235453	0.0229738	Glutathione
	GCNT1	1.27185	3.05858e-05	0.000713113	Glycan
	ST8SIA1	1.09417	0.000952722	0.0115951	Glycan
	MGAT4C	7.94573	5.65346e-10	4.0518e-08	Glycan
	ST8SIA5	1.50281	0.000389169	0.0057299	Glycan
	GALNT9	3.39758	0.00395404	0.0341601	Glycan
	ST6GALNAC5	3.74639	1.40442e-09	9.29523e-08	Glycan
	GALNT13	4.46279	1.56476e-10	1.24767e-08	Glycan
	GLT1D1	1.11227	0.00191809	0.0197812	Glycan
	MGAT5B	3.89328	2.01765e-08	1.06882e-06	Glycan
	B3GNT8	1.05309	2.27095e-05	0.000554021	Glycan
	GALNTL6	2.30197	0.00309987	0.0284764	Glycan
	GPLD1	1.71921	0.000146025	0.00262659	Glycan Anchor
	PIGG	2.39051	1.60779e-25	1.23391e-22	Glycan Anchor
	CHST5	6.2947	0.00317683	0.0290299	Glycan Sulfate
	CHST9	2.21449	0.000342003	0.00516764	Glycan Sulfate
	ALDOB	4.40995	0.00145804	0.0159665	Glycolysis
	GCK	6.87458	8.76683e-10	5.93663e-08	Glycolysis
	PGM5	2.3099	0.00244214	0.0236427	Glycolysis
	HAO1	20.5292	4.92287e-17	1.13343e-14	Glyoxylate
	HS3ST4	10.7173	7.11999e-09	4.18988e-07	Heparin Sulfate
	HS3ST3B1	1.24408	5.67501e-05	0.00120009	Heparin Sulfate
	NDST4	15.6735	0.00465399	0.03832	Heparin Sulfate
	HS6ST2	4.13326	2.86549e-08	1.45398e-06	Heparin Sulfate
	HS6ST3	11.9721	2.55904e-16	5.23721e-14	Heparin Sulfate
	HDC	2.01812	0.0013955	0.0154821	Histidine
	FTCD	12.688	4.80865e-12	5.11969e-10	Histidine
	ALOX15	1.94285	0.00174645	0.0184343	Hormone
	DIO3	1.08693	0.00314994	0.028822	Hormone
	PTGIS	1.91171	0.00248152	0.0238929	Hormone
	TPO	3.24122	0.00579776	0.0447973	Hormone
	PTGES	1.21953	0.00196544	0.0201119	Hormone
	ACE2	4.53494	0.000574251	0.00783491	Hormone
	PIK3R5	1.36218	0.000420422	0.00607353	Inositol Phosphate
	ATP1A3	4.68051	5.29611e-07	2.03652e-05	Ion Transport
	ATP1B2	2.98554	4.80255e-07	1.87845e-05	Ion Transport
	ATP2A3	1.51511	2.90223e-05	0.000680971	Ion Transport
	ATP2B2	15.663	4.34264e-24	2.66624e-21	Ion Transport
	ATP4A	21.3408	0.00218143	0.0217132	Ion Transport
	HCN2	6.195	4.09974e-15	6.68257e-13	Ion Transport
	CACNA1A	7.39183	2.38942e-11	2.21159e-09	Ion Transport
	CACNA1B	12.0578	1.31225e-15	2.4123e-13	Ion Transport
	CACNA1D	1.1067	8.6411e-05	0.00170043	Ion Transport
	CACNB2	1.32369	0.0012119	0.0138819	Ion Transport
	CACNG1	4.72862	4.21872e-05	0.000943298	Ion Transport
	CHRNB2	3.5165	1.87233e-05	0.000469203	Ion Transport
	CHRNG	1.69802	0.000272399	0.00429932	Ion Transport
	GABRA1	12.63	1.37456e-11	1.32555e-09	Ion Transport
	GABRA3	3.99178	0.0021209	0.0212309	Ion Transport
	GABRB1	5.27723	8.89863e-07	3.27154e-05	Ion Transport
	GABRB2	3.84089	5.62684e-09	3.36496e-07	Ion Transport
	GABRB3	2.67828	1.56481e-05	0.000402544	Ion Transport
	GABRR1	5.76294	0.00100092	0.0120417	Ion Transport
	GLRA1	7.93161	2.75442e-07	1.14265e-05	Ion Transport
	GRIA2	3.87994	7.55335e-05	0.00151718	Ion Transport
	GRIA3	2.62994	8.54123e-05	0.00168438	Ion Transport
	GRIA4	6.70138	3.59399e-13	4.47282e-11	Ion Transport
	GRIK2	1.73828	0.000441098	0.00632756	Ion Transport
	GRIK4	1.0701	0.00644227	0.0485516	Ion Transport
	GRIK5	3.18401	5.21373e-06	0.000156403	Ion Transport
	GRIN2B	1.89477	0.00222101	0.0220414	Ion Transport
	HTR3A	1.9586	0.000780377	0.00998872	Ion Transport
	KCNA1	5.32497	5.72234e-07	2.18672e-05	Ion Transport
	KCNA3	1.67372	0.00411375	0.0350306	Ion Transport
	KCNA5	9.68533	2.21333e-14	3.28769e-12	Ion Transport
	KCNA6	1.99009	0.000934463	0.0114365	Ion Transport
	KCNB1	4.46506	2.93611e-06	9.35643e-05	Ion Transport
	KCNC1	9.39208	4.05881e-12	4.42362e-10	Ion Transport
	KCNC2	9.57498	1.13526e-09	7.6038e-08	Ion Transport
	KCNG1	2.83823	0.000864436	0.0108387	Ion Transport
	KCNH2	1.79967	0.000333187	0.00507188	Ion Transport
	KCNJ2	1.25701	1.06997e-05	0.000290246	Ion Transport
	KCNJ3	4.70399	6.61345e-07	2.50644e-05	Ion Transport
	KCNJ6	2.68808	0.000208452	0.00346524	Ion Transport
	KCNJ10	2.5389	0.00509079	0.0407683	Ion Transport
	KCNJ11	2.28301	5.02906e-05	0.00108977	Ion Transport
	KCNMB1	1.81381	0.00367153	0.0324034	Ion Transport
	KCNN2	1.48543	7.69156e-05	0.00154158	Ion Transport
	KCNQ3	3.90756	5.7416e-10	4.09901e-08	Ion Transport
	P2RX1	6.22941	1.41869e-05	0.000371704	Ion Transport
	SCNN1B	3.44315	1.26278e-05	0.000334664	Ion Transport
	SLC12A3	3.41271	0.00010873	0.00205406	Ion Transport
	SLC30A2	4.00205	0.00584253	0.0450643	Ion Transport
	BSND	6.44071	7.43057e-08	3.44745e-06	Ion Transport
	CACNA1I	3.38132	3.32412e-06	0.000104483	Ion Transport
	P2RX6	3.67882	2.17519e-07	9.18917e-06	Ion Transport
	CACNA2D2	1.5639	0.00667604	0.0498848	Ion Transport
	KCNB2	3.30085	1.43113e-05	0.00037343	Ion Transport
	CLCA2	3.54665	0.00136152	0.0152171	Ion Transport
	HCN4	7.7314	2.3744e-13	3.12386e-11	Ion Transport
	KCNMB2	2.55412	0.000983601	0.0118961	Ion Transport
	CACNG2	10.4279	7.9303e-06	0.000223241	Ion Transport
	CLCA4	13.7799	1.04858e-12	1.24605e-10	Ion Transport
	KCNH3	6.54763	4.191e-12	4.51427e-10	Ion Transport
	MCOLN3	1.90199	0.000166789	0.00290368	Ion Transport
	CACNA2D3	1.70666	0.00203294	0.020574	Ion Transport
	TRPC7	10.8003	4.68181e-07	1.84656e-05	Ion Transport
	SLC12A5	23.0065	9.29465e-33	2.48309e-29	Ion Transport
	HCN3	1.20251	1.07182e-06	3.8483e-05	Ion Transport
	CACNG7	9.98046	2.01938e-08	1.06882e-06	Ion Transport
	TRPM3	13.3643	4.74209e-19	1.55972e-16	Ion Transport
	KCNH6	10.8884	7.68307e-10	5.26076e-08	Ion Transport
	KCNK16	6.01027	8.66207e-06	0.000240643	Ion Transport
	SLC30A8	4.66756	4.41169e-05	0.000974328	Ion Transport
	MCOLN2	1.27882	0.00441153	0.0367953	Ion Transport
	SLC39A5	4.858	0.00289674	0.0269743	Ion Transport
	KCTD4	7.78613	0.00192388	0.0198188	Ion Transport
	OGDHL	2.59232	0.000362869	0.00541188	Krebs
	MDH1B	1.99143	4.65956e-06	0.000141625	Krebs
	DGKQ	1.36232	1.74654e-08	9.43386e-07	Membrane Lipid
	GPD1	2.14164	0.00015235	0.00270863	Membrane Lipid
	PLCH2	1.65084	0.000122215	0.00227427	Membrane Lipid
	PEMT	2.85083	6.77748e-12	6.85903e-10	Membrane Lipid
	PLD3	1.18615	5.74887e-09	3.42681e-07	Membrane Lipid
	PLA2G2D	5.39529	0.00117769	0.0136098	Membrane Lipid
	PLCXD3	5.53653	8.29746e-10	5.63952e-08	Membrane Lipid
	ADH1A	5.27311	0.000912597	0.0112285	Multipurpose
	ADH1B	2.83684	0.00508707	0.0407563	Multipurpose
	ADH4	25.2345	2.65665e-06	8.57695e-05	Multipurpose
	ADH6	3.55847	1.0659e-05	0.000289568	Multipurpose
	ADH7	12.6047	4.13214e-06	0.000126639	Multipurpose
	ALDH1A1	2.68586	2.78707e-10	2.11255e-08	Multipurpose
	CA1	19.6364	0.00532389	0.0421223	Multipurpose
	NAT8B	1.69518	0.00650378	0.0488752	Multipurpose
	CA10	19.7301	1.22642e-21	5.79215e-19	Multipurpose
	ABHD12B	3.32217	0.000232817	0.00379156	Multipurpose
	NAT8L	2.99967	6.73979e-06	0.000195805	Multipurpose
	NMNAT2	2.74513	1.86326e-08	1.00349e-06	NAD
	NOX5	9.91679	1.1403e-17	2.80043e-15	NAD
	ABAT	2.08252	2.97808e-06	9.45747e-05	Neurotransmitter
	DDC	2.63758	0.00082139	0.0104411	Neurotransmitter
	ENPP2	3.3853	4.2076e-11	3.75562e-09	Nucleotide
	ENPP6	1.98319	0.00088361	0.0110116	Nucleotide
	ENPP7	11.9452	0.00105132	0.012469	Nucleotide
	AOAH	1.8747	0.000969997	0.0117697	Other
	GNMT	7.41976	0.00144105	0.0158848	Other
	GLYATL1	2.33233	0.0037758	0.0330858	Other
	MFSD7	1.2776	5.05958e-06	0.000152027	Other Transport
	MCART6	1.81794	0.000274098	0.00431874	Other Transport
	TKTL1	5.24078	0.000901737	0.0111846	Pentose Phosphate
	TYR	4.0557	0.00120032	0.0138093	Pigment
	PRODH2	34.5888	2.56519e-28	3.37488e-25	Proline
	AK5	4.22475	3.86302e-09	2.3797e-07	Purine
	UPB1	1.38752	0.00237543	0.0231253	Pyrimidine
	NOS1	4.30342	0.0020315	0.0205708	Reactive Oxygen
	NOS2	2.03022	0.00664513	0.0497143	Reactive Oxygen
	LPO	1.58983	0.00207391	0.0209197	Redox
	DHRS2	2.98524	0.000119017	0.00222555	Redox
	ADCY1	10.7391	4.87432e-25	3.45308e-22	Signalling
	ADCY2	1.12852	0.00439121	0.0366644	Signalling
	ADCY5	1.45635	0.00312236	0.0286265	Signalling
	GUCY2C	7.73048	0.00554123	0.043413	Signalling
	PDE3B	1.14175	0.000490026	0.00687418	Signalling
	PDE6G	1.23489	0.00486498	0.0395446	Signalling
	PDE8B	1.34059	0.000227624	0.00372676	Signalling
	ADCY10	6.83536	1.82613e-15	3.23418e-13	Signalling
	AQP8	13.9591	0.00536095	0.0423471	Small Molecule Transport
	AQP3	1.27084	0.000834604	0.0105726	Small Molecule Transport
	AQP4	4.47636	3.21945e-08	1.60702e-06	Small Molecule Transport
	SLC26A3	61.6664	0.000362761	0.00541188	Small Molecule Transport
	FOLR1	3.4373	0.00149277	0.016279	Small Molecule Transport
	SLC2A1	1.0591	0.00145303	0.01594	Small Molecule Transport
	SLC2A2	5.202	0.00197838	0.0201771	Small Molecule Transport
	SLC2A4	4.48251	0.000538527	0.0074636	Small Molecule Transport
	SLC6A4	14.2035	2.15761e-18	6.20109e-16	Small Molecule Transport
	SLC6A13	9.65074	2.69527e-15	4.59669e-13	Small Molecule Transport
	SLC7A2	3.78549	3.13043e-09	1.94139e-07	Small Molecule Transport
	SLC8A2	5.49873	1.03035e-06	3.73582e-05	Small Molecule Transport
	SLC8A3	2.96688	6.96643e-06	0.000201436	Small Molecule Transport
	SLC10A2	17.1218	0.00286768	0.0267713	Small Molecule Transport
	SLC18A1	31.5613	0.000262397	0.0041845	Small Molecule Transport
	SLC18A2	4.42906	9.40642e-09	5.36399e-07	Small Molecule Transport
	SLC22A4	1.15551	5.7294e-06	0.000169662	Small Molecule Transport
	SLC7A5	1.10592	8.03025e-05	0.00159902	Small Molecule Transport
	SLC4A8	4.58693	1.84312e-10	1.45701e-08	Small Molecule Transport
	ATP8A1	1.70975	2.37576e-06	7.7539e-05	Small Molecule Transport
	SLC26A1	1.33735	1.40867e-06	4.89552e-05	Small Molecule Transport
	SLC7A8	3.95246	3.09312e-15	5.22681e-13	Small Molecule Transport
	SLC45A2	3.26159	8.78086e-08	4.02325e-06	Small Molecule Transport
	SLC22A17	5.73101	3.59533e-12	3.94181e-10	Small Molecule Transport
	ATP8A2	8.76827	1.30523e-19	4.37111e-17	Small Molecule Transport
	SLC38A4	15.4786	1.16981e-22	5.98521e-20	Small Molecule Transport
	SVOP	7.20607	5.33536e-08	2.57932e-06	Small Molecule Transport
	SLC7A10	9.27461	0.0059253	0.0455882	Small Molecule Transport
	SLC4A10	3.58216	7.27694e-05	0.00147128	Small Molecule Transport
	SLC7A14	7.63559	1.34357e-08	7.38725e-07	Small Molecule Transport
	SLC22A16	8.71593	1.11936e-17	2.78616e-15	Small Molecule Transport
	SLC34A3	1.43192	0.000201335	0.00336209	Small Molecule Transport
	SLC35F3	3.9315	9.46271e-07	3.45821e-05	Small Molecule Transport
	SLC5A8	19.118	0.00186561	0.0194033	Small Molecule Transport
	SLC29A4	3.65384	4.38194e-07	1.74322e-05	Small Molecule Transport
	SLC26A11	1.06079	5.48688e-06	0.000163797	Small Molecule Transport
	SLC9A9	1.00763	0.00188133	0.0194978	Small Molecule Transport
	SLC35F4	12.6334	1.33769e-16	2.89871e-14	Small Molecule Transport
	SLC16A12	1.7849	0.00506872	0.0406447	Small Molecule Transport
	SLC6A17	2.67567	0.000146937	0.00264042	Small Molecule Transport
	AQP12B	9.94622	0.0047448	0.0389126	Small Molecule Transport
	LASS1	3.248	2.46322e-05	0.000595374	Sphingolipid
	CYP1A2	12.1328	0.0037633	0.0330078	Steroid
	CYP2E1	1.71511	0.0039991	0.0344686	Steroid
	CYP3A4	18.0665	4.60403e-05	0.00101075	Steroid
	KL	3.33677	3.42784e-06	0.000107194	Steroid
	CYP46A1	6.30299	6.60272e-13	8.10771e-11	Steroid
	CYP2W1	2.2161	0.00152191	0.0165576	Steroid
	AMY1A	29.4022	0.000337168	0.00511135	Sugar
	AMY2B	15.6207	0.000669285	0.00886238	Sugar
	LCT	29.3199	0.000167645	0.00291306	Sugar
	SI	53.9032	0.000407702	0.00593165	Sugar
	MGAM	3.17988	0.00563633	0.0438696	Sugar
	SULT1A2	1.03013	0.00145066	0.015933	Sulfate
	SULT2A1	38.3243	0.000657368	0.00873597	Sulfate
	ACMSD	6.55563	5.17782e-07	2.00358e-05	Tryptophan
	IDO2	3.6526	0.000234707	0.00379967	Tryptophan
	HPD	7.64571	5.34894e-05	0.00114428	Tyrosine
	TAT	7.87519	2.57837e-14	3.76913e-12	Tyrosine
	ARG1	31.8427	2.62554e-40	4.83598e-36	Urea
	ARG2	1.73196	7.74559e-09	4.51475e-07	Urea
	LRAT	1.99864	0.000432285	0.0062206	Vitamin A
	RDH12	10.6133	1.89787e-16	3.97238e-14	Vitamin A
	PCDHA5	19.1443	7.36902e-37	6.7865e-33	#N/A
	CDH4	20.4899	3.3484e-35	2.0558e-31	#N/A
	SERPIND1	19.6013	3.53891e-34	1.62958e-30	#N/A
	BTBD11	13.7435	1.02809e-33	3.78729e-30	#N/A
	GPR179	24.3525	9.43681e-33	2.48309e-29	#N/A
	TMEM132B	11.8904	2.76511e-32	6.36631e-29	#N/A
	FGB	32.2176	5.25589e-32	1.07565e-28	#N/A
	PTPRT	18.854	9.9944e-31	1.84087e-27	#N/A
	FSTL4	18.8721	2.86924e-30	4.80441e-27	#N/A
	MYO18B	14.8277	7.34375e-29	1.1272e-25	#N/A
	WDR16	18.8816	1.65838e-28	2.34967e-25	#N/A
	CCKAR	32.2162	5.59143e-28	6.8659e-25	#N/A
	VSTM2A	27.5978	1.36868e-27	1.57561e-24	#N/A
	CDH12	14.9222	4.94238e-27	5.34935e-24	#N/A
	FLJ26850	11.4153	5.22766e-27	5.34935e-24	#N/A
	FLJ43860	24.2332	6.11297e-27	5.92604e-24	#N/A
	EMID2	10.331	6.73073e-27	6.19866e-24	#N/A
	GAGE2D	92.1656	8.82238e-27	7.73807e-24	#N/A
	SYT5	19.1999	2.67803e-26	2.24212e-23	#N/A
	IL4	30.0555	4.75361e-26	3.80682e-23	#N/A
	C20orf26	14.7226	4.50191e-25	3.31683e-22	#N/A
	LOC255167	12.1352	1.56524e-24	1.06174e-21	#N/A
	SPOCK3	18.3313	1.73293e-24	1.10065e-21	#N/A
	GAGE1	60.5241	5.68763e-24	3.37937e-21	#N/A
	RIMS4	10.0953	8.72122e-24	5.01988e-21	#N/A
	PAPPA2	21.3698	1.35866e-23	7.58339e-21	#N/A
	UBE2QL1	8.56312	1.64245e-23	8.89773e-21	#N/A
	TTLL9	7.66053	2.89605e-23	1.52407e-20	#N/A
	MOBKL1A	3.57768	8.56002e-22	4.26127e-19	#N/A
	PAGE2B	25.1701	1.19219e-21	5.77866e-19	#N/A
	NAA20	2.39149	1.55764e-21	7.17256e-19	#N/A
	SPEF1	9.97078	1.64735e-21	7.40061e-19	#N/A
	RFPL1	21.4463	2.01703e-21	8.84566e-19	#N/A
	GNAS	3.67743	2.27572e-21	9.74803e-19	#N/A
	CDHR3	10.5436	2.76778e-21	1.15863e-18	#N/A
	SH3GL3	17.0801	3.56319e-21	1.45845e-18	#N/A
	LOC400891	25.2393	4.5523e-21	1.8228e-18	#N/A
	SSTR2	10.9102	7.79662e-21	3.05545e-18	#N/A
	LRP11	2.56005	8.48224e-21	3.25488e-18	#N/A
	EYA1	11.8933	1.58678e-20	5.96468e-18	#N/A
	TUBB1	6.77591	1.89594e-20	6.98426e-18	#N/A
	GPR142	14.6899	1.93754e-20	6.99755e-18	#N/A
	TMEM132E	8.29202	2.35016e-20	8.32454e-18	#N/A
	LRRC4B	10.9121	6.75443e-20	2.34736e-17	#N/A
	KLRC2	12.931	7.26603e-20	2.47839e-17	#N/A
	PRB2	25.2392	6.27094e-19	2.0134e-16	#N/A
	DDN	7.58458	6.35083e-19	2.0134e-16	#N/A
	SEZ6L	15.402	6.55273e-19	2.0134e-16	#N/A
	RIMBP2	12.5914	6.55868e-19	2.0134e-16	#N/A
	SNTG1	25.1189	7.47845e-19	2.25812e-16	#N/A
	GAGE4	53.8119	1.88268e-18	5.59307e-16	#N/A
	SERPINA10	18.0693	2.1538e-18	6.20109e-16	#N/A
	GPR113	8.31138	2.18834e-18	6.20109e-16	#N/A
	ck0010	9.84612	2.26141e-18	6.31104e-16	#N/A
	LRP1B	8.87323	4.00135e-18	1.10001e-15	#N/A
	LOC644165	6.88632	4.57279e-18	1.23862e-15	#N/A
	LGI3	12.1116	5.05594e-18	1.34964e-15	#N/A
	C14orf101	1.39139	6.54163e-18	1.72129e-15	#N/A
	C1orf158	20.4217	7.33755e-18	1.90353e-15	#N/A
	DNAI2	19.8211	9.29958e-18	2.37901e-15	#N/A
	ABHD15	2.30051	9.96568e-18	2.51449e-15	#N/A
	PPP4R4	12.4595	1.22674e-17	2.97307e-15	#N/A
	F10	8.17598	1.45839e-17	3.48859e-15	#N/A
	CCDC65	6.33279	2.80285e-17	6.61868e-15	#N/A
	CNIH2	9.7134	4.55545e-17	1.06211e-14	#N/A
	POPDC3	9.46285	5.75322e-17	1.30825e-14	#N/A
	GRM1	10.1604	8.79153e-17	1.97477e-14	#N/A
	GPR149	31.282	9.31536e-17	2.06723e-14	#N/A
	PRB1	25.664	1.24741e-16	2.73524e-14	#N/A
	FAM167A	5.60345	1.44483e-16	3.09446e-14	#N/A
	FAM5B	12.6925	1.59108e-16	3.36852e-14	#N/A
	PHF21B	9.50408	2.062e-16	4.26741e-14	#N/A
	AGT	9.59187	2.90424e-16	5.87837e-14	#N/A
	CSMD1	8.92879	4.29077e-16	8.5904e-14	#N/A
	BTBD17	13.3605	4.36679e-16	8.64858e-14	#N/A
	KLRG2	15.9949	4.88571e-16	9.57339e-14	#N/A
	WNT4	8.33153	4.9999e-16	9.69402e-14	#N/A
	LRRC10B	7.47702	5.68094e-16	1.08997e-13	#N/A
	COL25A1	7.17415	5.78892e-16	1.09924e-13	#N/A
	EDN3	9.36338	9.5759e-16	1.79978e-13	#N/A
	ASXL3	5.44498	1.07171e-15	1.99393e-13	#N/A
	LOC153328	8.55809	1.32278e-15	2.4123e-13	#N/A
	ZDHHC22	10.9818	1.34238e-15	2.42405e-13	#N/A
	USH2A	5.76609	1.62051e-15	2.89787e-13	#N/A
	EML5	3.66272	1.89924e-15	3.33162e-13	#N/A
	PCSK2	14.0481	2.11079e-15	3.6678e-13	#N/A
	COL2A1	18.7543	2.4728e-15	4.25668e-13	#N/A
	MTMR7	5.44976	3.43147e-15	5.74584e-13	#N/A
	C6orf118	16.265	3.49516e-15	5.77409e-13	#N/A
	ST18	10.8632	3.51104e-15	5.77409e-13	#N/A
	PCDHA8	9.96549	4.45021e-15	7.19022e-13	#N/A
	RSPH10B2	7.11098	7.12584e-15	1.14131e-12	#N/A
	HAP1	9.86072	7.6176e-15	1.20956e-12	#N/A
	LOC150527	24.9783	8.40677e-15	1.32346e-12	#N/A
	TRIM67	4.86479	8.86517e-15	1.38379e-12	#N/A
	ELAVL3	13.0252	9.5013e-15	1.47063e-12	#N/A
	QPCT	5.5113	9.95031e-15	1.52376e-12	#N/A
	MAFB	4.19433	1.00101e-14	1.52376e-12	#N/A
	ANKRD26P1	13.8168	1.16588e-14	1.76019e-12	#N/A
	CAPN14	6.21987	1.22554e-14	1.83522e-12	#N/A
	ck0038	7.05551	2.3891e-14	3.52039e-12	#N/A
	MAGEA1	31.0443	4.51706e-14	6.55116e-12	#N/A
	CLGN	8.71974	4.85967e-14	6.993e-12	#N/A
	TRIM9	5.98988	5.73267e-14	8.18528e-12	#N/A
	CPLX1	4.06214	5.92758e-14	8.39847e-12	#N/A
	TTC8	1.38778	6.12123e-14	8.60664e-12	#N/A
	ZNF705A	11.9224	7.77688e-14	1.08517e-11	#N/A
	RGS9	6.41032	8.7181e-14	1.20736e-11	#N/A
	SERPINA11	12.6325	1.1354e-13	1.56066e-11	#N/A
	C6orf103	14.3495	1.16954e-13	1.59568e-11	#N/A
	CPE	6.33219	1.24051e-13	1.68007e-11	#N/A
	ISL1	5.80287	1.25304e-13	1.68465e-11	#N/A
	IRX2	12.4568	2.04809e-13	2.73361e-11	#N/A
	TMEM63C	10.7253	2.26414e-13	3.00023e-11	#N/A
	LY6H	10.7803	2.45321e-13	3.20465e-11	#N/A
	RNF17	18.704	2.54865e-13	3.30589e-11	#N/A
	DCC	10.2598	2.8173e-13	3.6288e-11	#N/A
	C8orf45	2.47704	2.86326e-13	3.66239e-11	#N/A
	ISM2	6.95203	2.99584e-13	3.80555e-11	#N/A
	VGF	9.74297	3.44883e-13	4.35096e-11	#N/A
	C17orf72	3.89295	3.57283e-13	4.47282e-11	#N/A
	FGA	11.426	4.49176e-13	5.5526e-11	#N/A
	CELF5	6.99522	6.88897e-13	8.40317e-11	#N/A
	KIAA1958	2.66841	7.29788e-13	8.8434e-11	#N/A
	LRRC67	9.92236	8.85906e-13	1.0665e-10	#N/A
	MGC16703	5.39854	9.93556e-13	1.18833e-10	#N/A
	GC	11.0688	1.61268e-12	1.9041e-10	#N/A
	TMEM59L	6.73343	1.70443e-12	1.99962e-10	#N/A
	MYO16	4.89106	2.04754e-12	2.38694e-10	#N/A
	CCNA1	6.73205	2.07884e-12	2.39904e-10	#N/A
	GPR119	13.6689	2.08397e-12	2.39904e-10	#N/A
	PPIL6	2.63606	2.12765e-12	2.43411e-10	#N/A
	EFNB3	6.31494	2.27829e-12	2.59036e-10	#N/A
	FAM179A	5.38155	2.6453e-12	2.98919e-10	#N/A
	C6orf27	3.77091	2.81499e-12	3.16154e-10	#N/A
	SPANXC	21.8001	3.161e-12	3.52863e-10	#N/A
	ANKS1B	7.49267	3.25941e-12	3.61657e-10	#N/A
	LPPR1	8.23352	3.36749e-12	3.71412e-10	#N/A
	UNC13A	7.19602	4.10136e-12	4.44371e-10	#N/A
	FAM135B	9.43078	4.32198e-12	4.62828e-10	#N/A
	SPATS1	10.9904	4.89817e-12	5.16135e-10	#N/A
	INSL5	13.0751	4.90383e-12	5.16135e-10	#N/A
	C5orf27	4.38875	4.97996e-12	5.2117e-10	#N/A
	C12orf76	1.58974	5.06646e-12	5.27227e-10	#N/A
	LRP2BP	2.21433	5.67354e-12	5.87084e-10	#N/A
	PCGF3	1.15952	6.13532e-12	6.31321e-10	#N/A
	C14orf148	2.8862	6.19019e-12	6.33428e-10	#N/A
	OSBP2	2.27391	6.6244e-12	6.74115e-10	#N/A
	GPR148	12.8514	8.2479e-12	8.30154e-10	#N/A
	RASD1	4.81682	8.71896e-12	8.72796e-10	#N/A
	DIRAS2	5.18814	8.76826e-12	8.72987e-10	#N/A
	FAM23A	5.41238	9.52507e-12	9.43238e-10	#N/A
	PPP1R1A	9.55885	9.95317e-12	9.80361e-10	#N/A
	SGK3	1.55717	1.16485e-11	1.14124e-09	#N/A
	C9orf24	7.78163	1.17248e-11	1.14264e-09	#N/A
	DLK2	6.31568	1.27659e-11	1.23755e-09	#N/A
	IQSEC3	5.75571	1.45525e-11	1.39605e-09	#N/A
	GPER	2.80701	1.74408e-11	1.66447e-09	#N/A
	SPANXB2	28.8467	1.81616e-11	1.72433e-09	#N/A
	SNORD115-26	18.6386	2.03265e-11	1.91997e-09	#N/A
	EPHA5	10.8314	2.32425e-11	2.18421e-09	#N/A
	CHGB	11.1783	2.3639e-11	2.21019e-09	#N/A
	CASKIN1	7.14695	2.37605e-11	2.21032e-09	#N/A
	TMEM86B	2.82403	2.55091e-11	2.34926e-09	#N/A
	RIMS2	8.08119	2.75625e-11	2.52574e-09	#N/A
	C22orf42	14.6939	3.00006e-11	2.73555e-09	#N/A
	SSTR3	9.84763	3.11115e-11	2.82287e-09	#N/A
	MYT1	9.1248	3.1751e-11	2.86678e-09	#N/A
	CCDC151	4.98261	4.00274e-11	3.59642e-09	#N/A
	GPRIN1	2.04518	4.22072e-11	3.75562e-09	#N/A
	DPP6	7.95242	4.41217e-11	3.90711e-09	#N/A
	SHISA7	12.2805	4.57146e-11	4.02879e-09	#N/A
	ATG9B	4.76986	4.72582e-11	4.14499e-09	#N/A
	PARM1	3.56794	5.04539e-11	4.40432e-09	#N/A
	SLC22A10	12.4399	5.28375e-11	4.59063e-09	#N/A
	FAM163A	7.2935	5.60895e-11	4.8503e-09	#N/A
	TMED8	1.20098	6.17702e-11	5.31657e-09	#N/A
	CEACAM19	3.43179	6.32108e-11	5.40632e-09	#N/A
	C1orf194	9.64929	6.34e-11	5.40632e-09	#N/A
	ARX	9.72602	6.5363e-11	5.54803e-09	#N/A
	SPATA4	7.74217	7.27622e-11	6.14774e-09	#N/A
	LOXL4	3.88091	7.5147e-11	6.32024e-09	#N/A
	GPR64	6.5077	8.04565e-11	6.73604e-09	#N/A
	APLP1	6.96975	8.63139e-11	7.1649e-09	#N/A
	KBTBD10	6.01174	8.63568e-11	7.1649e-09	#N/A
	KIF3A	1.39094	9.89006e-11	8.16884e-09	#N/A
	ZNF34	1.02037	9.97445e-11	8.20176e-09	#N/A
	MAGI2	1.79813	1.02426e-10	8.38483e-09	#N/A
	CDH26	6.17172	1.03815e-10	8.46092e-09	#N/A
	CD99L2	1.54367	1.2327e-10	1.00023e-08	#N/A
	BAIAP3	5.1499	1.30547e-10	1.05002e-08	#N/A
	PART1	9.84765	1.54335e-10	1.23595e-08	#N/A
	CHRM4	4.0513	1.82531e-10	1.44915e-08	#N/A
	MSI1	4.84738	1.95663e-10	1.54014e-08	#N/A
	ABCA11P	1.20864	1.96678e-10	1.54154e-08	#N/A
	PTPRN	8.48983	2.04864e-10	1.5989e-08	#N/A
	TMEM145	7.47884	2.18625e-10	1.6991e-08	#N/A
	KCNIP1	6.2467	2.27866e-10	1.76347e-08	#N/A
	SMCR7	1.07871	2.48012e-10	1.90339e-08	#N/A
	SHANK1	3.86066	2.68114e-10	2.04913e-08	#N/A
	ASTN1	7.84708	2.93995e-10	2.2193e-08	#N/A
	PCDHA2	3.48501	3.04973e-10	2.29277e-08	#N/A
	TP53I13	1.70854	3.35126e-10	2.50922e-08	#N/A
	LOC729467	9.16636	3.42111e-10	2.55115e-08	#N/A
	C9orf171	13.021	3.43558e-10	2.55161e-08	#N/A
	PNMA2	2.8802	3.73781e-10	2.76493e-08	#N/A
	ARHGAP39	1.6105	3.82806e-10	2.82036e-08	#N/A
	RTN1	5.06892	4.33481e-10	3.16837e-08	#N/A
	DUSP15	4.26797	4.6305e-10	3.35784e-08	#N/A
	TTR	11.3801	5.14707e-10	3.7178e-08	#N/A
	SYT4	8.13144	5.33026e-10	3.83508e-08	#N/A
	CALY	11.949	5.82686e-10	4.14382e-08	#N/A
	MAMLD1	2.90509	5.85924e-10	4.15082e-08	#N/A
	C19orf63	1.07157	6.12852e-10	4.32495e-08	#N/A
	C4orf44	3.66246	6.32912e-10	4.43255e-08	#N/A
	C13orf36	8.72279	6.5618e-10	4.56083e-08	#N/A
	NECAB2	6.14303	6.61099e-10	4.57774e-08	#N/A
	DPY19L2P1	7.99593	6.72394e-10	4.63851e-08	#N/A
	PAGE5	13.1634	8.04234e-10	5.48637e-08	#N/A
	CCDC11	3.02039	8.91148e-10	6.01247e-08	#N/A
	C20orf46	3.38128	9.30583e-10	6.25562e-08	#N/A
	DPY19L2P2	2.53809	1.34145e-09	8.95221e-08	#N/A
	PELI3	1.74924	1.38934e-09	9.23837e-08	#N/A
	LDLRAD1	7.19313	1.40799e-09	9.29523e-08	#N/A
	C1orf141	12.5332	1.43137e-09	9.41589e-08	#N/A
	HAR1A	4.29834	1.43813e-09	9.42664e-08	#N/A
	MAST1	4.73687	1.4875e-09	9.71568e-08	#N/A
	PTPRN2	3.61601	1.52214e-09	9.90679e-08	#N/A
	GAK	1.33519	1.84011e-09	1.19341e-07	#N/A
	USH1G	8.06788	2.10375e-09	1.35962e-07	#N/A
	C10orf10	1.48486	2.16756e-09	1.39595e-07	#N/A
	PRLR	4.50913	2.21618e-09	1.42229e-07	#N/A
	C10orf79	3.27836	2.27234e-09	1.45327e-07	#N/A
	DNAH9	4.31566	2.34289e-09	1.49321e-07	#N/A
	C9orf117	3.85474	2.54717e-09	1.61781e-07	#N/A
	SYT3	4.25423	2.57679e-09	1.63099e-07	#N/A
	C10orf93	4.49379	2.89448e-09	1.8258e-07	#N/A
	P4HTM	1.30154	2.92806e-09	1.84068e-07	#N/A
	C1orf168	6.77053	2.96963e-09	1.86046e-07	#N/A
	FAM154B	4.64977	3.01345e-09	1.88151e-07	#N/A
	ARVCF	1.96678	3.09718e-09	1.92726e-07	#N/A
	VCX3A	6.16249	3.37047e-09	2.08325e-07	#N/A
	RXFP3	6.53918	3.96616e-09	2.43509e-07	#N/A
	REM2	2.4819	4.05265e-09	2.47992e-07	#N/A
	C20orf12	1.15431	4.16237e-09	2.53863e-07	#N/A
	EFR3B	3.34822	4.29377e-09	2.61013e-07	#N/A
	TCTN1	1.17286	4.50315e-09	2.71946e-07	#N/A
	RTL1	12.5609	5.27301e-09	3.17397e-07	#N/A
	FAM123A	10.2625	6.44784e-09	3.83106e-07	#N/A
	DLGAP3	4.29999	6.64522e-09	3.93564e-07	#N/A
	ZNF483	3.215	7.10842e-09	4.18988e-07	#N/A
	C3orf67	2.91002	7.4312e-09	4.35908e-07	#N/A
	LRTM2	8.30634	7.58442e-09	4.43484e-07	#N/A
	SERPINF2	3.05185	7.92698e-09	4.6059e-07	#N/A
	FBXL21	14.6163	8.09713e-09	4.68997e-07	#N/A
	CDKL2	3.11201	8.14943e-09	4.70547e-07	#N/A
	ck0004	5.35546	8.71375e-09	5.01558e-07	#N/A
	KIAA1244	2.76311	9.06591e-09	5.20202e-07	#N/A
	USP27X	2.0749	9.15868e-09	5.23893e-07	#N/A
	INSM1	7.33848	9.51897e-09	5.41142e-07	#N/A
	GNAZ	3.24601	9.88888e-09	5.60441e-07	#N/A
	PHLDB3	1.3663	1.03618e-08	5.85442e-07	#N/A
	SPTBN4	5.21955	1.05342e-08	5.93362e-07	#N/A
	KIAA1377	2.1387	1.07141e-08	6.01653e-07	#N/A
	PCDHGA3	2.91284	1.08021e-08	6.04751e-07	#N/A
	CCDC40	1.80887	1.11548e-08	6.22605e-07	#N/A
	DPP4	2.80855	1.13477e-08	6.3146e-07	#N/A
	WDR63	4.7372	1.18578e-08	6.57857e-07	#N/A
	FOXD4L2	3.98159	1.2357e-08	6.81448e-07	#N/A
	ODZ1	5.11983	1.43164e-08	7.84804e-07	#N/A
	EFCAB10	2.71482	1.52616e-08	8.34132e-07	#N/A
	CRH	10.2783	1.5606e-08	8.50433e-07	#N/A
	KGFLP2	1.55357	1.71991e-08	9.34487e-07	#N/A
	TMEM132D	7.67885	1.74445e-08	9.43386e-07	#N/A
	DIRAS1	3.85105	1.92267e-08	1.02947e-06	#N/A
	TPPP	2.57542	1.94305e-08	1.03736e-06	#N/A
	GAGE2A	24.1183	2.00374e-08	1.06667e-06	#N/A
	C6orf154	2.27927	2.02609e-08	1.0693e-06	#N/A
	ASB16	2.69856	2.04905e-08	1.07539e-06	#N/A
	CXXC4	4.12888	2.0493e-08	1.07539e-06	#N/A
	LOC728392	3.83538	2.10079e-08	1.09928e-06	#N/A
	TMEM130	2.97547	2.28679e-08	1.19321e-06	#N/A
	LOC100272217	2.13948	2.35537e-08	1.22552e-06	#N/A
	LRRC4	3.81737	2.39872e-08	1.24456e-06	#N/A
	C20orf132	2.13406	2.41305e-08	1.2473e-06	#N/A
	CASP14	21.8589	2.41754e-08	1.2473e-06	#N/A
	DLGAP2	3.92874	2.55206e-08	1.30937e-06	#N/A
	ROPN1L	4.88938	2.56621e-08	1.31297e-06	#N/A
	AMPH	3.27778	2.73525e-08	1.39173e-06	#N/A
	FAM171A2	2.67093	2.92741e-08	1.47726e-06	#N/A
	SYT14	5.32889	2.99689e-08	1.50819e-06	#N/A
	CCDC108	4.08475	3.21013e-08	1.60672e-06	#N/A
	LRRC37A3	1.67965	3.47861e-08	1.72842e-06	#N/A
	RFX6	7.35104	3.48143e-08	1.72842e-06	#N/A
	NAPB	1.20957	3.6056e-08	1.78525e-06	#N/A
	CDK5R2	5.57527	3.85901e-08	1.90051e-06	#N/A
	C8orf42	1.61283	3.94845e-08	1.93937e-06	#N/A
	SGSM1	3.24157	4.23361e-08	2.06984e-06	#N/A
	CRHBP	4.42783	4.23655e-08	2.06984e-06	#N/A
	LRRC16B	3.33583	4.3328e-08	2.11127e-06	#N/A
	GPR6	9.8659	5.20655e-08	2.53033e-06	#N/A
	C5orf49	4.00532	5.25878e-08	2.54899e-06	#N/A
	OR2L13	8.52481	5.42461e-08	2.6156e-06	#N/A
	NOL4	6.65388	5.50116e-08	2.64559e-06	#N/A
	TUSC3	2.28168	5.77626e-08	2.77065e-06	#N/A
	JAKMIP2	2.94164	5.84484e-08	2.79626e-06	#N/A
	C21orf29	5.68022	5.88887e-08	2.81003e-06	#N/A
	SCG5	5.22152	6.04558e-08	2.87735e-06	#N/A
	TEKT2	4.18763	6.17411e-08	2.93095e-06	#N/A
	DSCAM	7.84505	6.21491e-08	2.94274e-06	#N/A
	PPM1E	3.7008	6.56045e-08	3.09838e-06	#N/A
	CRYBA2	9.2036	6.59749e-08	3.10791e-06	#N/A
	RAP1GAP2	1.62815	6.92015e-08	3.25159e-06	#N/A
	GIPR	3.39529	7.1683e-08	3.35961e-06	#N/A
	PPP2R2B	2.51868	7.29269e-08	3.40576e-06	#N/A
	LETM2	1.97535	7.30373e-08	3.40576e-06	#N/A
	KRT81	6.86042	7.32485e-08	3.40698e-06	#N/A
	ADAMTS18	3.56576	8.08837e-08	3.74321e-06	#N/A
	SPTB	2.40398	8.18486e-08	3.77094e-06	#N/A
	XKR7	7.68703	8.18925e-08	3.77094e-06	#N/A
	PAX6	3.84426	8.66379e-08	3.97951e-06	#N/A
	TMEM90B	2.36738	9.01629e-08	4.12087e-06	#N/A
	FST	3.79237	9.33046e-08	4.2539e-06	#N/A
	GPR162	2.19452	9.51486e-08	4.32726e-06	#N/A
	TEKT1	17.046	9.88105e-08	4.48274e-06	#N/A
	DUSP26	5.21001	1.03202e-07	4.659e-06	#N/A
	ALX1	6.7676	1.06496e-07	4.79598e-06	#N/A
	WFS1	1.25011	1.0737e-07	4.82352e-06	#N/A
	GLIPR1L2	2.45205	1.08452e-07	4.86027e-06	#N/A
	C22orf45	2.82616	1.10414e-07	4.93396e-06	#N/A
	ck0016	1.74528	1.10632e-07	4.93396e-06	#N/A
	COL6A6	4.48405	1.12281e-07	4.99542e-06	#N/A
	RUNDC3A	6.07655	1.25622e-07	5.57548e-06	#N/A
	KIF5A	4.45454	1.34845e-07	5.97046e-06	#N/A
	NKX2-2	6.97538	1.36736e-07	6.03968e-06	#N/A
	C2orf50	2.28797	1.38965e-07	6.12343e-06	#N/A
	CDH8	4.69193	1.43104e-07	6.29076e-06	#N/A
	RIBC1	1.93575	1.54288e-07	6.76628e-06	#N/A
	PDZD2	2.23324	1.5473e-07	6.76953e-06	#N/A
	C12orf68	2.31501	1.56863e-07	6.84659e-06	#N/A
	CRHR2	4.60678	1.59154e-07	6.93014e-06	#N/A
	CCDC96	1.39199	1.67539e-07	7.27805e-06	#N/A
	CDH18	7.39476	1.68178e-07	7.28866e-06	#N/A
	MAPK8IP2	3.61377	1.76474e-07	7.63024e-06	#N/A
	RNF222	4.63987	1.85349e-07	7.95793e-06	#N/A
	FAM81B	4.64248	2.00054e-07	8.5099e-06	#N/A
	SNPH	1.84057	2.15518e-07	9.12556e-06	#N/A
	C5orf38	8.12256	2.26995e-07	9.56757e-06	#N/A
	TMEM232	2.42293	2.45507e-07	1.03242e-05	#N/A
	C7orf52	6.25509	2.57379e-07	1.07988e-05	#N/A
	RPRM	5.07158	2.61855e-07	1.09616e-05	#N/A
	C11orf16	6.46266	2.62676e-07	1.0971e-05	#N/A
	RAB36	1.38823	2.68109e-07	1.11726e-05	#N/A
	DPY19L2P4	4.10956	2.74836e-07	1.14265e-05	#N/A
	RSPH4A	3.65255	3.0265e-07	1.2527e-05	#N/A
	TMEM179	7.62785	3.18358e-07	1.31476e-05	#N/A
	ARMC3	5.46969	3.22678e-07	1.32665e-05	#N/A
	TCAP	3.02566	3.35678e-07	1.37703e-05	#N/A
	NCAM1	3.80516	3.37953e-07	1.3813e-05	#N/A
	LMO1	5.34375	3.3822e-07	1.3813e-05	#N/A
	CRMP1	2.8315	3.62656e-07	1.47782e-05	#N/A
	C2orf39	6.67434	3.7626e-07	1.52988e-05	#N/A
	KIAA1045	2.70022	3.86744e-07	1.56559e-05	#N/A
	CHGA	6.65072	3.95194e-07	1.58729e-05	#N/A
	GPR153	1.4937	3.96412e-07	1.58729e-05	#N/A
	REEP2	3.58	4.14823e-07	1.6574e-05	#N/A
	JPH3	3.38208	4.26289e-07	1.69953e-05	#N/A
	ANGPTL3	4.79021	4.42187e-07	1.75531e-05	#N/A
	RFPL2	4.20769	4.65831e-07	1.84519e-05	#N/A
	OXGR1	4.39746	4.68154e-07	1.84656e-05	#N/A
	RASGRF1	4.36759	4.78497e-07	1.87845e-05	#N/A
	ck0055	2.13962	4.80348e-07	1.87845e-05	#N/A
	WDR66	1.42251	5.00775e-07	1.95076e-05	#N/A
	RFX2	1.42401	5.14616e-07	1.99552e-05	#N/A
	DNER	4.6307	5.19817e-07	2.00723e-05	#N/A
	RHOXF1	4.31861	5.27921e-07	2.03426e-05	#N/A
	RNF182	3.74755	5.32857e-07	2.04473e-05	#N/A
	BCAM	2.02909	5.38673e-07	2.06275e-05	#N/A
	C12orf34	3.29823	5.78851e-07	2.20743e-05	#N/A
	DNAI1	5.98513	6.48604e-07	2.46831e-05	#N/A
	CPLX2	6.53228	6.60331e-07	2.50644e-05	#N/A
	MAPT	3.51345	6.69616e-07	2.53258e-05	#N/A
	LRRTM2	2.74353	6.71616e-07	2.53494e-05	#N/A
	GAGE12D	24.0301	7.09753e-07	2.6734e-05	#N/A
	CELF4	4.35502	7.37548e-07	2.76116e-05	#N/A
	FKBP2	1.01401	7.4032e-07	2.76591e-05	#N/A
	C6orf26	1.6629	7.42465e-07	2.76831e-05	#N/A
	PACRG	2.87129	7.7797e-07	2.89138e-05	#N/A
	STC2	1.86755	7.78611e-07	2.89138e-05	#N/A
	LAMA5	1.12822	8.16858e-07	3.0273e-05	#N/A
	RASA4	1.40475	8.28946e-07	3.06594e-05	#N/A
	TEKT4	2.31769	9.21196e-07	3.37998e-05	#N/A
	OR13A1	3.58624	9.36868e-07	3.43065e-05	#N/A
	GPR19	1.76149	9.48171e-07	3.45829e-05	#N/A
	KRT78	5.19101	9.80512e-07	3.56918e-05	#N/A
	CHRDL2	16.0582	1.01711e-06	3.6951e-05	#N/A
	SLAMF9	3.78221	1.04222e-06	3.76407e-05	#N/A
	ERO1LB	3.69752	1.04456e-06	3.76511e-05	#N/A
	AVPR1B	5.55387	1.09871e-06	3.92953e-05	#N/A
	GPR20	3.06336	1.12822e-06	4.02726e-05	#N/A
	SRCIN1	2.10101	1.1398e-06	4.05289e-05	#N/A
	LOC100130872	1.47505	1.14679e-06	4.06506e-05	#N/A
	FBXO15	2.85808	1.14764e-06	4.06506e-05	#N/A
	EFCAB6	1.52595	1.17883e-06	4.16752e-05	#N/A
	C9orf4	6.17993	1.21072e-06	4.2593e-05	#N/A
	BSN	3.3047	1.21132e-06	4.2593e-05	#N/A
	NBEA	2.03839	1.21172e-06	4.2593e-05	#N/A
	S100Z	2.92059	1.27373e-06	4.46872e-05	#N/A
	TTC25	1.81291	1.38181e-06	4.8295e-05	#N/A
	C14orf174	1.63463	1.39391e-06	4.86259e-05	#N/A
	PDZD4	2.28304	1.41416e-06	4.90534e-05	#N/A
	ADAM11	1.81409	1.44142e-06	4.99051e-05	#N/A
	LRRC24	4.12471	1.45994e-06	5.04513e-05	#N/A
	CCDC87	1.58732	1.49364e-06	5.15195e-05	#N/A
	EML6	2.06205	1.53049e-06	5.25934e-05	#N/A
	SEZ6L2	1.00908	1.54802e-06	5.30967e-05	#N/A
	ANKRD7	4.54187	1.6478e-06	5.63096e-05	#N/A
	KLKB1	3.50364	1.65648e-06	5.64524e-05	#N/A
	PRLHR	5.92966	1.65811e-06	5.64524e-05	#N/A
	GZMH	4.83847	1.67161e-06	5.68069e-05	#N/A
	NXF2B	14.2807	1.75748e-06	5.95077e-05	#N/A
	MCF2L2	2.12554	1.75754e-06	5.95077e-05	#N/A
	RSPH9	2.33694	1.7836e-06	6.02792e-05	#N/A
	KLHL3	1.07242	1.81226e-06	6.11357e-05	#N/A
	BPIL1	18.6446	1.85271e-06	6.23454e-05	#N/A
	LRRC46	1.86744	1.85489e-06	6.23454e-05	#N/A
	CXCR6	4.01335	1.86887e-06	6.27006e-05	#N/A
	TTC29	10.9499	1.94242e-06	6.49317e-05	#N/A
	GATSL1	1.67625	1.95662e-06	6.5288e-05	#N/A
	GNAI1	1.04948	1.98068e-06	6.59712e-05	#N/A
	NDRG4	2.34726	2.09577e-06	6.94282e-05	#N/A
	FGF17	3.44341	2.11847e-06	7.0054e-05	#N/A
	KSR2	2.27751	2.19967e-06	7.26087e-05	#N/A
	RTBDN	4.71952	2.20927e-06	7.27953e-05	#N/A
	LRRC23	1.51462	2.33167e-06	7.64182e-05	#N/A
	C20orf152	2.86687	2.34114e-06	7.65922e-05	#N/A
	MAPK12	1.32804	2.3785e-06	7.7539e-05	#N/A
	FBLL1	4.26901	2.38813e-06	7.77154e-05	#N/A
	TTC18	2.25037	2.46297e-06	8.00096e-05	#N/A
	RBP2	46.0423	2.65891e-06	8.57695e-05	#N/A
	PPFIA3	1.66314	2.83179e-06	9.10273e-05	#N/A
	CFC1B	6.76428	2.84905e-06	9.13457e-05	#N/A
	POU4F1	5.57607	2.85161e-06	9.13457e-05	#N/A
	DOCK3	2.37804	2.87147e-06	9.18221e-05	#N/A
	ZNF185	1.46262	2.92711e-06	9.34391e-05	#N/A
	FAM183A	6.51644	2.95807e-06	9.41014e-05	#N/A
	SERPINI1	1.68256	2.98674e-06	9.46864e-05	#N/A
	PCDHA6	2.41511	3.06752e-06	9.70801e-05	#N/A
	TMEM151A	3.14848	3.07929e-06	9.72854e-05	#N/A
	ADAM29	4.16697	3.22448e-06	0.000101524	#N/A
	GPR171	4.98679	3.40517e-06	0.000106848	#N/A
	LOC389332	5.28634	3.49955e-06	0.000109251	#N/A
	CLSTN2	1.77193	3.64506e-06	0.000113409	#N/A
	KIAA1409	4.61385	3.76266e-06	0.000116871	#N/A
	NTNG1	3.00096	3.77137e-06	0.000116944	#N/A
	VWA5B2	5.36914	3.86729e-06	0.000119717	#N/A
	SPRR2A	7.24633	3.95878e-06	0.000122304	#N/A
	IGFBPL1	3.83141	3.96414e-06	0.000122304	#N/A
	LMX1B	3.46172	4.09179e-06	0.000126031	#N/A
	OSBPL6	1.90989	4.10576e-06	0.000126084	#N/A
	PCDHA1	3.88721	4.1072e-06	0.000126084	#N/A
	SYP	4.26456	4.36806e-06	0.000133637	#N/A
	DENND2A	1.08977	4.375e-06	0.000133637	#N/A
	GPR150	3.73244	4.53961e-06	0.000138207	#N/A
	C2CD4A	2.88916	4.74139e-06	0.000143874	#N/A
	KNDC1	2.92333	4.78812e-06	0.000145053	#N/A
	EPOR	1.05311	4.87562e-06	0.000147462	#N/A
	GPR135	1.42725	4.91936e-06	0.000148541	#N/A
	CXorf57	2.79456	5.2631e-06	0.000157628	#N/A
	MAP3K15	6.6838	5.61272e-06	0.000167012	#N/A
	SPC25	1.08416	5.64821e-06	0.000167579	#N/A
	NKAIN1	2.63058	5.64994e-06	0.000167579	#N/A
	PRRT3	1.59043	5.7766e-06	0.000170785	#N/A
	SDK2	2.24742	5.81898e-06	0.000171762	#N/A
	WSCD1	1.47226	5.85966e-06	0.000172687	#N/A
	RAB3A	1.81216	5.95103e-06	0.000175099	#N/A
	SPANXE	10.3824	5.98647e-06	0.000175861	#N/A
	C21orf58	1.99084	6.13019e-06	0.000179796	#N/A
	C7orf51	2.378	6.15707e-06	0.000180297	#N/A
	C1orf230	4.64655	6.30338e-06	0.000184289	#N/A
	PYHIN1	5.80905	6.32642e-06	0.000184669	#N/A
	CCDC158	2.35613	6.50693e-06	0.000189638	#N/A
	FBXO16	1.05859	6.65175e-06	0.000193552	#N/A
	C11orf41	1.57907	6.81115e-06	0.000197566	#N/A
	LOC100130386	4.35739	6.93069e-06	0.000200718	#N/A
	ZFR2	4.38244	6.98934e-06	0.000201782	#N/A
	POU6F2	4.38034	7.0022e-06	0.000201836	#N/A
	SCGB1A1	13.6447	7.076e-06	0.000203645	#N/A
	IL18RAP	3.01733	7.09322e-06	0.000203822	#N/A
	FOXD4L5	5.32837	7.12827e-06	0.00020451	#N/A
	WDR17	2.73078	7.16797e-06	0.00020533	#N/A
	SMOC1	4.0974	7.22737e-06	0.000206389	#N/A
	CELSR3	1.72367	7.53792e-06	0.000214592	#N/A
	PLK2	1.01781	7.5651e-06	0.000215033	#N/A
	SNAP91	3.56354	7.64519e-06	0.000216975	#N/A
	F7	3.69336	7.67251e-06	0.000217097	#N/A
	INA	4.0396	7.67306e-06	0.000217097	#N/A
	SERPINA1	2.08585	7.85262e-06	0.000221497	#N/A
	LYPD3	2.71829	8.02761e-06	0.000224712	#N/A
	PCDHB4	1.40448	8.58264e-06	0.000238797	#N/A
	DYNC1I1	2.21128	8.8566e-06	0.000245677	#N/A
	XPNPEP2	18.3912	8.95249e-06	0.000247591	#N/A
	PCLO	2.04931	9.10838e-06	0.000250773	#N/A
	GNG4	2.80734	9.22273e-06	0.000253542	#N/A
	KLRB1	3.79225	9.41513e-06	0.000258446	#N/A
	CELF3	5.09784	9.60015e-06	0.000263118	#N/A
	TTC24	10.1237	9.61391e-06	0.000263118	#N/A
	NXF2	11.3387	9.79102e-06	0.000267171	#N/A
	RGL4	3.04397	9.85321e-06	0.000268471	#N/A
	C20orf201	4.36896	1.0399e-05	0.000282924	#N/A
	LOC401127	1.28128	1.09264e-05	0.000295962	#N/A
	KLRC3	2.74627	1.09753e-05	0.000296849	#N/A
	CD8A	3.33414	1.12042e-05	0.000302152	#N/A
	GZMB	3.80418	1.17156e-05	0.00031502	#N/A
	SERPINA12	4.75734	1.17697e-05	0.000315649	#N/A
	MAK	1.85659	1.17732e-05	0.000315649	#N/A
	TSPAN19	8.33132	1.18715e-05	0.000317398	#N/A
	PACSIN1	2.66199	1.18771e-05	0.000317398	#N/A
	MPP2	2.34266	1.18901e-05	0.000317398	#N/A
	PNMAL1	2.0071	1.23324e-05	0.000328727	#N/A
	REC8	1.81048	1.23769e-05	0.000329437	#N/A
	LOC285419	1.93275	1.24222e-05	0.000330166	#N/A
	PPP1R3F	1.24203	1.24589e-05	0.000330663	#N/A
	CD2	3.03891	1.29612e-05	0.000342598	#N/A
	DAB1	3.48988	1.2983e-05	0.000342598	#N/A
	DCAF12L2	3.36598	1.31411e-05	0.00034578	#N/A
	DNAJC6	2.32984	1.31674e-05	0.000345976	#N/A
	EGR4	2.45667	1.38606e-05	0.000363673	#N/A
	RPH3AL	1.15871	1.43142e-05	0.00037343	#N/A
	CCDC13	1.2353	1.44176e-05	0.000375082	#N/A
	SSTR5	3.48258	1.47978e-05	0.000383887	#N/A
	ITGA2B	1.67391	1.50051e-05	0.000388719	#N/A
	SPINK7	6.30882	1.52859e-05	0.000395397	#N/A
	PODXL2	1.6267	1.53058e-05	0.000395397	#N/A
	DARC	5.52481	1.55014e-05	0.000399889	#N/A
	LYVE1	4.39645	1.58575e-05	0.000406796	#N/A
	HMP19	4.05236	1.60365e-05	0.000410815	#N/A
	DSCAML1	2.97479	1.60654e-05	0.000410985	#N/A
	TRIM46	1.49577	1.62032e-05	0.000413934	#N/A
	WDR65	2.5543	1.62435e-05	0.000414389	#N/A
	PCP4	3.95715	1.63411e-05	0.00041546	#N/A
	C15orf26	3.41753	1.6834e-05	0.000427087	#N/A
	C14orf132	1.30866	1.71571e-05	0.000434686	#N/A
	CAMK2B	4.31569	1.72534e-05	0.000436216	#N/A
	JAKMIP3	1.42252	1.72649e-05	0.000436216	#N/A
	CCDC74B	1.21803	1.75833e-05	0.000443654	#N/A
	DDX53	16.9507	1.76126e-05	0.000443786	#N/A
	THEMIS	4.81895	1.79502e-05	0.000451674	#N/A
	TMEM190	5.93632	1.81665e-05	0.000456492	#N/A
	CD96	3.33053	1.89814e-05	0.000474381	#N/A
	RTN4RL1	2.05162	1.93279e-05	0.000481085	#N/A
	CNIH3	1.31938	1.9328e-05	0.000481085	#N/A
	MRGPRX3	7.77921	1.94551e-05	0.000483595	#N/A
	PCSK1N	4.78456	1.97293e-05	0.000489091	#N/A
	KIAA1324	3.32458	2.04379e-05	0.000505974	#N/A
	CNTN5	5.09927	2.05698e-05	0.000508158	#N/A
	SCG3	4.53007	2.05813e-05	0.000508158	#N/A
	SOX15	2.35128	2.0789e-05	0.000512601	#N/A
	HPR	15.7383	2.10488e-05	0.000518313	#N/A
	MED12L	1.64815	2.12523e-05	0.000522625	#N/A
	CLEC4E	4.24471	2.17429e-05	0.000533266	#N/A
	APOA4	94.1737	2.20043e-05	0.00053896	#N/A
	FAM123C	4.16403	2.25334e-05	0.000551185	#N/A
	TLL1	3.08554	2.26533e-05	0.000553384	#N/A
	CAPSL	6.57994	2.34411e-05	0.000571113	#N/A
	MAP7D2	2.45126	2.34905e-05	0.000571562	#N/A
	C9orf172	1.84168	2.4277e-05	0.000589917	#N/A
	TMIE	2.1363	2.45061e-05	0.000593917	#N/A
	SNAP25	3.06301	2.45558e-05	0.000594342	#N/A
	LOC401431	1.86417	2.46631e-05	0.000595374	#N/A
	LY9	4.97409	2.54313e-05	0.000612413	#N/A
	CMA1	17.6182	2.54355e-05	0.000612413	#N/A
	NOVA1	2.35486	2.56764e-05	0.000616601	#N/A
	FAM65B	4.19365	2.60039e-05	0.000623654	#N/A
	SCRT1	3.48874	2.632e-05	0.000630414	#N/A
	SEZ6	5.38569	2.66217e-05	0.000636811	#N/A
	FAM92B	3.92944	2.68761e-05	0.000639655	#N/A
	RGS7	2.54616	2.68795e-05	0.000639655	#N/A
	FAM184B	4.85957	2.71697e-05	0.000644895	#N/A
	FLJ37201	1.18532	2.75988e-05	0.000653397	#N/A
	GPR98	3.38471	2.78176e-05	0.00065773	#N/A
	MGC42105	2.25935	2.82707e-05	0.000666731	#N/A
	EPHA6	2.02668	2.86738e-05	0.000674511	#N/A
	FAIM3	4.92749	2.87391e-05	0.000675185	#N/A
	SIT1	4.84179	2.93947e-05	0.00068883	#N/A
	STK32A	1.96623	2.94947e-05	0.000690295	#N/A
	DNAH7	1.36584	3.04043e-05	0.00070978	#N/A
	CNTN6	4.1159	3.09828e-05	0.000721457	#N/A
	KISS1R	3.1838	3.1752e-05	0.000737504	#N/A
	FMN2	3.42817	3.20834e-05	0.000744262	#N/A
	MADCAM1	7.54477	3.22343e-05	0.000746823	#N/A
	UCHL1	1.75668	3.27545e-05	0.000757922	#N/A
	APBB1	1.10484	3.33092e-05	0.00076979	#N/A
	C1orf88	1.85729	3.37958e-05	0.000779081	#N/A
	CD7	2.39946	3.45543e-05	0.00079557	#N/A
	NXF5	6.73644	3.50001e-05	0.000804827	#N/A
	TTC23L	1.88648	3.77317e-05	0.000865481	#N/A
	STX1A	1.00414	3.86937e-05	0.00088534	#N/A
	CABP1	1.01441	3.96766e-05	0.000905581	#N/A
	GRM4	4.167	4.01809e-05	0.000914363	#N/A
	UBASH3A	3.10285	4.02755e-05	0.000914363	#N/A
	SP140	3.12064	4.02943e-05	0.000914363	#N/A
	NCRNA00181	1.05153	4.03365e-05	0.000914363	#N/A
	CD247	2.56909	4.03593e-05	0.000914363	#N/A
	ACTL6B	6.39319	4.05362e-05	0.000917243	#N/A
	GRM8	1.49882	4.07439e-05	0.000920813	#N/A
	CDX1	15.7122	4.10648e-05	0.000926928	#N/A
	CD3E	3.07665	4.15245e-05	0.000933623	#N/A
	CCL5	2.17206	4.18963e-05	0.000939936	#N/A
	ACTG2	14.0102	4.22394e-05	0.000943298	#N/A
	NEFM	2.45977	4.22774e-05	0.000943298	#N/A
	PTPN7	2.12941	4.2701e-05	0.000949891	#N/A
	FASLG	2.94443	4.2793e-05	0.00095079	#N/A
	F2	5.50805	4.48274e-05	0.000988834	#N/A
	CPNE4	3.10153	4.54997e-05	0.00100136	#N/A
	SPAG6	4.95771	4.5504e-05	0.00100136	#N/A
	UCKL1AS	1.26279	4.63051e-05	0.00101535	#N/A
	ZMYND10	2.35294	4.66174e-05	0.00102098	#N/A
	CD3D	3.18329	4.75515e-05	0.00103897	#N/A
	GNAO1	1.96442	4.84453e-05	0.00105599	#N/A
	CD48	3.45094	4.86212e-05	0.00105857	#N/A
	DLG4	1.03229	5.04379e-05	0.00109167	#N/A
	SH2D1A	4.29973	5.1137e-05	0.00110421	#N/A
	LOC283663	5.59864	5.1349e-05	0.00110749	#N/A
	C9orf43	1.27583	5.17638e-05	0.00111411	#N/A
	FAM20A	1.19282	5.1777e-05	0.00111411	#N/A
	UNC80	3.92297	5.24549e-05	0.00112738	#N/A
	FABP1	44.1719	5.27376e-05	0.00113214	#N/A
	LINGO2	3.25935	5.28467e-05	0.00113316	#N/A
	CCR7	5.97699	5.32318e-05	0.00114009	#N/A
	GVIN1	3.25869	5.45863e-05	0.00116503	#N/A
	DPPA4	8.7347	5.55872e-05	0.00118365	#N/A
	YIPF7	3.9269	5.58132e-05	0.00118709	#N/A
	LOC253724	1.27084	5.60116e-05	0.00118763	#N/A
	SCG2	3.50494	5.64588e-05	0.0011953	#N/A
	GJD2	4.59935	5.84417e-05	0.00123303	#N/A
	DES	26.8135	5.85811e-05	0.00123456	#N/A
	PLAC8L1	1.63887	5.89269e-05	0.00123901	#N/A
	LRRC50	2.30205	5.91499e-05	0.00124047	#N/A
	C14orf39	4.70359	5.95259e-05	0.00124592	#N/A
	HOXD1	3.32762	5.98733e-05	0.00125177	#N/A
	GFRA1	3.76385	6.00059e-05	0.00125312	#N/A
	TRAT1	4.93085	6.1025e-05	0.00127296	#N/A
	NCF1B	3.48625	6.18056e-05	0.00128778	#N/A
	TSPAN33	1.21912	6.30998e-05	0.00130735	#N/A
	CCL21	6.58175	6.32872e-05	0.00130976	#N/A
	CPO	2.21895	6.36301e-05	0.00131418	#N/A
	CD79B	6.68004	6.62278e-05	0.00136144	#N/A
	LBP	17.8978	6.73189e-05	0.00138233	#N/A
	TTC9B	3.06465	6.74023e-05	0.0013825	#N/A
	HP	19.5612	6.79069e-05	0.0013913	#N/A
	MEP1A	27.4611	6.82093e-05	0.00139594	#N/A
	GATSL2	6.39253	6.94872e-05	0.00142027	#N/A
	MAP6	1.65175	6.95524e-05	0.00142027	#N/A
	PRDM12	2.01348	6.97197e-05	0.00142211	#N/A
	CD22	6.38681	7.03163e-05	0.0014327	#N/A
	CXCR5	8.84271	7.20706e-05	0.00146036	#N/A
	BARHL1	5.09994	7.26059e-05	0.00146959	#N/A
	NPFFR2	11.4232	7.30707e-05	0.00147576	#N/A
	OPRD1	4.95752	7.33654e-05	0.00148008	#N/A
	CD27	3.562	7.51102e-05	0.00151197	#N/A
	PI16	9.75688	7.54002e-05	0.00151615	#N/A
	ZNF560	4.14121	7.65702e-05	0.00153633	#N/A
	FAM169A	1.26403	7.75508e-05	0.00155262	#N/A
	RUNDC3B	1.36952	7.7659e-05	0.00155309	#N/A
	IRF4	3.93861	7.83202e-05	0.00156292	#N/A
	LRRN3	2.15032	8.23505e-05	0.00163626	#N/A
	OR4C6	7.93708	8.3156e-05	0.00165049	#N/A
	MLXIPL	2.11922	8.33981e-05	0.00165351	#N/A
	CELF6	1.32191	8.37401e-05	0.0016585	#N/A
	CASC1	1.80598	8.40132e-05	0.00166213	#N/A
	FCRL6	3.471	8.50595e-05	0.00167922	#N/A
	MAPK10	1.32406	8.7622e-05	0.00171693	#N/A
	SERPINA6	3.28484	8.79466e-05	0.00171963	#N/A
	RPRML	4.82873	8.88105e-05	0.00173468	#N/A
	CCL14	3.84131	8.92543e-05	0.0017415	#N/A
	CCDC69	1.72142	9.09505e-05	0.00176897	#N/A
	C8orf80	4.75672	9.19267e-05	0.00178412	#N/A
	IGFBP2	1.64665	9.20446e-05	0.00178412	#N/A
	FAM5C	19.6996	9.20896e-05	0.00178412	#N/A
	KIF1A	3.17465	9.21581e-05	0.00178412	#N/A
	ICA1L	1.08714	9.22508e-05	0.00178412	#N/A
	FFAR1	4.07449	9.31606e-05	0.00179866	#N/A
	ZNF467	1.14049	9.33345e-05	0.00180013	#N/A
	CD3G	3.55163	9.36132e-05	0.00180362	#N/A
	GPR21	1.65968	9.41824e-05	0.00180912	#N/A
	KLHL6	2.20914	9.4193e-05	0.00180912	#N/A
	GPR18	4.31333	9.62356e-05	0.00184642	#N/A
	LOC731779	6.63354	9.84053e-05	0.00188412	#N/A
	GNG2	1.27456	9.92991e-05	0.00189729	#N/A
	P2RY10	4.13806	9.9796e-05	0.00190481	#N/A
	FLJ43390	4.22729	0.000100738	0.00191881	#N/A
	C2orf62	2.13681	0.000102324	0.0019446	#N/A
	CD52	2.51255	0.00010399	0.00197057	#N/A
	LTB	3.54598	0.00010604	0.00200734	#N/A
	VIPR2	5.88072	0.000111432	0.00210294	#N/A
	STAP1	7.20776	0.00011187	0.00210905	#N/A
	CMTM2	2.40719	0.000113523	0.00213802	#N/A
	PROK2	5.30616	0.000115213	0.00216542	#N/A
	GZMA	1.96997	0.000118414	0.00221652	#N/A
	TPPP3	1.15676	0.000120154	0.00224454	#N/A
	EYS	1.25756	0.000121755	0.00227139	#N/A
	DNAH6	1.09412	0.000121838	0.00227139	#N/A
	BTLA	5.43211	0.000122576	0.00227823	#N/A
	PAK3	2.73115	0.000125283	0.00231686	#N/A
	RSPO3	3.85341	0.000126177	0.00232871	#N/A
	AGBL4	3.1779	0.00012658	0.00233381	#N/A
	ATCAY	3.85975	0.000126764	0.00233486	#N/A
	GPR65	1.52612	0.000127692	0.00234826	#N/A
	ACVR1C	1.57784	0.000127746	0.00234826	#N/A
	CRTAC1	1.79929	0.000129147	0.00236758	#N/A
	KLRC1	3.16658	0.000129183	0.00236758	#N/A
	FAM57B	2.80735	0.000129914	0.00237626	#N/A
	CD40LG	3.81124	0.000130205	0.00237921	#N/A
	BRSK1	1.24215	0.000131763	0.0024053	#N/A
	C6orf217	1.96328	0.000132119	0.00240941	#N/A
	CTSG	6.54968	0.000132288	0.00241011	#N/A
	C1QTNF8	4.75095	0.000133327	0.00242424	#N/A
	SYNGR4	3.76627	0.000134216	0.002438	#N/A
	RIPPLY2	4.41575	0.000135782	0.002464	#N/A
	RGS4	1.47314	0.000138927	0.00251611	#N/A
	NFASC	1.56531	0.000139368	0.00252164	#N/A
	SCML2	1.29359	0.000142591	0.00257489	#N/A
	TLR10	4.7459	0.000143081	0.00258121	#N/A
	RHOH	2.64831	0.000145532	0.0026207	#N/A
	MOBP	2.31988	0.000145555	0.0026207	#N/A
	AP3B2	2.73837	0.000147834	0.00265395	#N/A
	CCR5	2.14522	0.000150637	0.00269026	#N/A
	LIN7B	1.09075	0.000150952	0.00269026	#N/A
	MAGEL2	1.43305	0.000151025	0.00269026	#N/A
	IL9R	2.27803	0.000152031	0.00270556	#N/A
	ARHGAP9	1.7812	0.000153256	0.0027221	#N/A
	GHR	1.32175	0.000154142	0.0027352	#N/A
	ASB2	3.72844	0.000154437	0.0027378	#N/A
	FAM166A	2.8247	0.000157123	0.00277282	#N/A
	PABPC1L2B	6.67414	0.00015718	0.00277282	#N/A
	DISP2	1.32635	0.000157223	0.00277282	#N/A
	SNCB	3.75965	0.000157428	0.00277282	#N/A
	TBX21	2.39551	0.000159507	0.00280072	#N/A
	SLAMF1	2.9451	0.000160143	0.00280922	#N/A
	PTHLH	1.46795	0.000163374	0.00285575	#N/A
	MUC21	5.71844	0.000163416	0.00285575	#N/A
	GMFG	1.1127	0.000164997	0.00287792	#N/A
	ARHGAP15	1.91658	0.000168688	0.00292566	#N/A
	TCL1A	21.7616	0.000169405	0.00293015	#N/A
	ck0014	1.31721	0.000169423	0.00293015	#N/A
	PGA3	25.5256	0.000170137	0.00293698	#N/A
	ZNF80	4.55377	0.000171321	0.00295383	#N/A
	CYTIP	1.70351	0.000171434	0.00295383	#N/A
	GPRASP1	1.2934	0.000171736	0.00295398	#N/A
	RAET1G	1.57716	0.000171924	0.00295398	#N/A
	IFLTD1	4.89498	0.000172848	0.00296709	#N/A
	KLRK1	2.45449	0.000176529	0.00302183	#N/A
	KIT	1.4811	0.000176992	0.00302694	#N/A
	C2orf54	1.50707	0.000177846	0.00303729	#N/A
	LHFPL4	3.33365	0.000177927	0.00303729	#N/A
	PCDHB8	1.18652	0.000179362	0.00305895	#N/A
	ACAP1	2.61661	0.000180521	0.00307588	#N/A
	RGAG4	1.33544	0.0001822	0.00309875	#N/A
	LOC285456	1.81476	0.000182965	0.00310888	#N/A
	SRRM4	5.65008	0.000183497	0.00311505	#N/A
	CNR1	2.98515	0.000185003	0.00313484	#N/A
	ORM2	26.1954	0.000186006	0.00314894	#N/A
	NCR3	4.59688	0.000186559	0.0031525	#N/A
	LOC100133893	2.43952	0.000188643	0.00317896	#N/A
	ZGLP1	1.08981	0.000188956	0.00318134	#N/A
	NKX6-1	2.00868	0.000195365	0.00327725	#N/A
	SYNM	8.07473	0.000196846	0.0032991	#N/A
	GJD4	2.89501	0.000199422	0.00333923	#N/A
	XKR4	2.67691	0.000199978	0.0033455	#N/A
	CD8B	2.44972	0.000204808	0.00341698	#N/A
	PGR	1.33269	0.000209573	0.00348072	#N/A
	LOC642597	3.26076	0.000209867	0.00348248	#N/A
	GPR158	2.00689	0.000213693	0.00352715	#N/A
	ZNF683	3.18489	0.000214561	0.00353805	#N/A
	NEK5	1.89576	0.000216291	0.00356046	#N/A
	TTLL10	1.39454	0.00021988	0.00361604	#N/A
	C6orf174	1.51631	0.000222013	0.00364461	#N/A
	LOC100188949	2.46317	0.000230675	0.00376666	#N/A
	SCAMP5	1.31566	0.000231745	0.00378079	#N/A
	NPAS4	2.09138	0.00023405	0.00379967	#N/A
	ZNF385D	3.3837	0.000234335	0.00379967	#N/A
	HLA-DQB1	2.17472	0.000234569	0.00379967	#N/A
	IGF1	5.36229	0.000235598	0.00380323	#N/A
	FEV	3.91457	0.000237134	0.00382132	#N/A
	MTUS2	2.25615	0.000238289	0.00383657	#N/A
	PYROXD2	1.02731	0.000239154	0.00384043	#N/A
	PTPRCAP	3.22025	0.000250663	0.00402174	#N/A
	KIAA0748	2.91054	0.000252854	0.00404633	#N/A
	ATRNL1	2.5389	0.000254022	0.00406149	#N/A
	S100A12	4.44472	0.000259172	0.00414023	#N/A
	LOC100130522	1.26511	0.000259469	0.00414138	#N/A
	FABP2	34.7365	0.000265543	0.00422369	#N/A
	CHRM2	31.3581	0.000266646	0.00423758	#N/A
	AFM	5.57974	0.000267082	0.00424085	#N/A
	GIMAP7	1.64658	0.000268386	0.00425788	#N/A
	DEFA5	127.96	0.000269987	0.00427225	#N/A
	FCRLA	10.3638	0.000272244	0.00429932	#N/A
	XCL1	2.60946	0.00027629	0.00433844	#N/A
	MYO3A	2.02209	0.000276948	0.00434507	#N/A
	FBXL16	1.95871	0.000278731	0.0043656	#N/A
	RIC3	1.87909	0.00028027	0.00438597	#N/A
	BLK	10.7688	0.000286788	0.00447277	#N/A
	CD72	1.77002	0.000287476	0.00447971	#N/A
	C20orf195	1.60444	0.000288117	0.0044859	#N/A
	LAX1	3.2714	0.000293165	0.0045568	#N/A
	GIMAP5	1.3578	0.000293673	0.00456085	#N/A
	GHRL	5.79302	0.000300053	0.00465209	#N/A
	GPR174	3.98884	0.000300485	0.00465486	#N/A
	ck0012	2.39913	0.00030213	0.00467641	#N/A
	C1QL4	2.27263	0.000302572	0.00467933	#N/A
	PATL2	2.28285	0.000312849	0.00481804	#N/A
	TBX5	2.94177	0.000317189	0.00487672	#N/A
	CXCL9	5.46676	0.000318872	0.00489035	#N/A
	APOB	14.6146	0.000320375	0.00490523	#N/A
	ACTN2	2.3234	0.000322746	0.00493332	#N/A
	FLJ36777	1.27448	0.000326374	0.00498465	#N/A
	AFF2	1.27391	0.000327575	0.00499885	#N/A
	PRKCG	3.13897	0.00033138	0.00505272	#N/A
	IRX1	5.41741	0.000331664	0.00505286	#N/A
	S100A1	4.40337	0.000333593	0.00507386	#N/A
	CTLA4	2.3244	0.000334591	0.00508485	#N/A
	CLEC17A	9.05701	0.000335407	0.00508884	#N/A
	CXCL13	10.1554	0.00033934	0.00513162	#N/A
	APOH	3.87835	0.000344839	0.00519156	#N/A
	CD79A	6.80657	0.000345277	0.00519156	#N/A
	IKZF1	2.19108	0.000350448	0.00526155	#N/A
	CCDC135	2.47643	0.000350626	0.00526155	#N/A
	CXorf65	4.99449	0.000351277	0.00526458	#N/A
	KIF5C	2.11392	0.000355411	0.00531788	#N/A
	PROC	1.28674	0.000358519	0.00536004	#N/A
	C13orf33	3.36157	0.000369025	0.00549036	#N/A
	UCN3	3.70298	0.000371604	0.00552427	#N/A
	EFCAB4B	3.95768	0.000376622	0.00558085	#N/A
	NCF1C	2.88985	0.000381094	0.00563805	#N/A
	PLG	15.6025	0.000389583	0.00573141	#N/A
	PENK	8.95102	0.000390278	0.00573706	#N/A
	CLEC10A	3.14352	0.000391361	0.00574839	#N/A
	TCERG1L	3.04448	0.00039295	0.00575796	#N/A
	TP63	2.29508	0.000396887	0.00581101	#N/A
	TMC8	1.55661	0.000398344	0.00582772	#N/A
	RCSD1	1.76489	0.000402196	0.00586544	#N/A
	IL12RB1	1.39787	0.000405404	0.00590288	#N/A
	CDH19	4.37115	0.000410655	0.00595667	#N/A
	HLA-DQA1	2.11763	0.000410716	0.00595667	#N/A
	MS4A1	12.2143	0.000411725	0.00596661	#N/A
	CXorf49B	4.22855	0.000413252	0.00598404	#N/A
	TNFRSF13B	8.74832	0.000414407	0.00599604	#N/A
	FCRL1	14.2919	0.000419917	0.006071	#N/A
	TMEM156	2.50252	0.000421101	0.00607858	#N/A
	ITK	3.30823	0.000421525	0.00607993	#N/A
	MIA2	1.3459	0.000435423	0.00626077	#N/A
	TEX11	7.40959	0.000436457	0.00627075	#N/A
	TMIGD2	1.98413	0.000445374	0.00637896	#N/A
	CFHR1	10.8429	0.000446128	0.00638059	#N/A
	MAP4K1	2.48583	0.00044618	0.00638059	#N/A
	GZMK	3.19999	0.000449027	0.00641632	#N/A
	C15orf59	1.17365	0.000451917	0.0064476	#N/A
	CD6	1.57685	0.000456344	0.00650251	#N/A
	C18orf16	2.73622	0.000456471	0.00650251	#N/A
	FLT3	4.55335	0.000459681	0.00653601	#N/A
	ZAP70	2.66193	0.000459887	0.00653601	#N/A
	TRAF3IP3	2.02102	0.000460382	0.00653799	#N/A
	PRF1	1.1448	0.000473878	0.00670896	#N/A
	FCRL3	6.37689	0.000475102	0.00671978	#N/A
	GLYATL3	6.24969	0.000476001	0.00672351	#N/A
	SLIT1	2.56215	0.000479298	0.00676489	#N/A
	LOC401387	1.74046	0.000481313	0.00678294	#N/A
	PEG3	1.41814	0.000485884	0.0068412	#N/A
	RSPO2	8.94047	0.000487583	0.00685034	#N/A
	LOC284551	3.21033	0.000488362	0.00685605	#N/A
	DLL3	2.71531	0.000493798	0.00692181	#N/A
	DMRTC1B	2.22778	0.000494513	0.00692656	#N/A
	SIRPG	2.56124	0.000495726	0.00693828	#N/A
	HCLS1	1.18161	0.00049975	0.0069849	#N/A
	ANGPTL1	2.80585	0.000499815	0.0069849	#N/A
	C6orf58	38.1009	0.00050423	0.00704125	#N/A
	UNC5D	3.35878	0.000510947	0.00711348	#N/A
	PTGER2	1.07362	0.000517098	0.00719368	#N/A
	C13orf18	1.7513	0.000520875	0.00724076	#N/A
	STXBP5L	2.98509	0.000528419	0.00734008	#N/A
	NEURL	2.22166	0.000537533	0.00745544	#N/A
	PCDHA11	1.70741	0.000539089	0.00746578	#N/A
	FOXF1	1.0252	0.000542037	0.00749532	#N/A
	RAET1E	1.04423	0.000554344	0.00763684	#N/A
	KIAA0125	6.89675	0.000563655	0.00773619	#N/A
	XCL2	2.25168	0.000564222	0.0077382	#N/A
	SRPK3	1.81658	0.000566202	0.00775759	#N/A
	ENDOU	2.32837	0.000571471	0.00781435	#N/A
	SEMA3D	1.76484	0.000571901	0.00781442	#N/A
	ZP1	2.08758	0.000575162	0.00783609	#N/A
	MGC14436	1.79839	0.000575189	0.00783609	#N/A
	ADAMDEC1	4.45206	0.000579864	0.00789396	#N/A
	ERP27	8.89351	0.000592182	0.00805569	#N/A
	MT1G	5.03071	0.000595378	0.00809208	#N/A
	BDKRB1	1.29536	0.000599183	0.00813291	#N/A
	KLHL14	5.62497	0.000606933	0.00821993	#N/A
	PRRT4	2.16152	0.000610129	0.00825713	#N/A
	CDH17	5.59511	0.000612229	0.00827947	#N/A
	FLG	1.60762	0.000614691	0.00830667	#N/A
	SCRT2	3.88016	0.000617115	0.00833332	#N/A
	LOC200726	6.15017	0.000620995	0.00837956	#N/A
	FBLN5	1.06334	0.000622015	0.00838718	#N/A
	RPGRIP1	1.17469	0.000625628	0.00842974	#N/A
	CD37	2.04576	0.000629871	0.00847451	#N/A
	CGB8	3.63794	0.000631629	0.00849195	#N/A
	GUCA2A	15.3741	0.000639193	0.00856863	#N/A
	FCAMR	7.40471	0.000641536	0.00859378	#N/A
	CNTN1	1.47606	0.000642795	0.00859853	#N/A
	CCR6	1.66647	0.000642953	0.00859853	#N/A
	KEL	5.69897	0.000643291	0.00859853	#N/A
	CEACAM3	2.43825	0.00064396	0.00860123	#N/A
	TBC1D10C	2.37379	0.000648759	0.00865905	#N/A
	GPR15	6.73726	0.00065315	0.00869247	#N/A
	PGA5	37.2536	0.000667798	0.00885126	#N/A
	TSPAN11	2.37694	0.000667965	0.00885126	#N/A
	CHD5	2.48249	0.000673646	0.00891371	#N/A
	RGMA	3.42032	0.000678468	0.00897107	#N/A
	AMHR2	7.23843	0.000681332	0.00899602	#N/A
	MYH11	5.38325	0.000689685	0.00908027	#N/A
	LRRIQ1	1.92861	0.000692792	0.00910817	#N/A
	FAM131C	2.18061	0.000695452	0.00913662	#N/A
	SERPINB13	6.02294	0.000699497	0.00917593	#N/A
	SASH3	1.517	0.000703038	0.00920345	#N/A
	HAND1	29.5145	0.000715257	0.00933885	#N/A
	PDIA2	14.3546	0.000715409	0.00933885	#N/A
	ORM1	16.7901	0.000725456	0.00945182	#N/A
	ASGR2	1.82225	0.000725693	0.00945182	#N/A
	KREMEN2	1.71659	0.000727144	0.00945852	#N/A
	FBN3	23.2419	0.000728901	0.00947468	#N/A
	CXorf30	4.46361	0.000735034	0.00953041	#N/A
	VPREB3	7.62651	0.000735572	0.00953041	#N/A
	WAS	1.15469	0.000736365	0.00953134	#N/A
	MGP	1.24598	0.000736903	0.00953162	#N/A
	GDF1	3.53507	0.000742319	0.00958148	#N/A
	RPTN	4.74439	0.000753307	0.00970969	#N/A
	FCER2	14.2293	0.000760672	0.00979092	#N/A
	RPL39	1.39938	0.000762	0.00980118	#N/A
	LOC100130331	1.55573	0.00076642	0.00984428	#N/A
	CD1D	1.21072	0.000778541	0.00997215	#N/A
	ISX	18.5376	0.000798532	0.0102069	#N/A
	CLEC4D	3.27688	0.000802788	0.0102542	#N/A
	PAX5	10.0591	0.000806235	0.0102911	#N/A
	C4orf47	1.5061	0.000810481	0.0103381	#N/A
	NRG1	1.4426	0.000815211	0.0103793	#N/A
	C13orf30	4.66356	0.000815398	0.0103793	#N/A
	SUSD4	1.13061	0.000821241	0.0104411	#N/A
	FAM78A	1.08476	0.000822722	0.0104508	#N/A
	CST5	4.78592	0.000823509	0.0104536	#N/A
	MSTN	1.20668	0.000831851	0.0105523	#N/A
	DPF1	1.85653	0.000845565	0.0106674	#N/A
	CASQ1	5.53219	0.000852823	0.0107443	#N/A
	SELL	2.46883	0.000858135	0.0107891	#N/A
	FXYD7	4.29462	0.000858906	0.0107914	#N/A
	PDCD1	2.21564	0.000870913	0.0109125	#N/A
	LOC254559	2.06524	0.000872888	0.0109298	#N/A
	PPY	18.4365	0.000875937	0.0109531	#N/A
	ARRDC5	1.87551	0.00087739	0.0109638	#N/A
	NLRP6	3.58407	0.00088134	0.0109965	#N/A
	LOC220594	2.75241	0.000881708	0.0109965	#N/A
	PRKCQ	1.84227	0.000881801	0.0109965	#N/A
	PCDHA4	1.62134	0.000893028	0.0111126	#N/A
	CHRDL1	4.0096	0.00089732	0.0111448	#N/A
	C1orf64	20.2683	0.000899222	0.0111609	#N/A
	LOC401093	1.57573	0.000905094	0.0112028	#N/A
	GPR97	2.41807	0.000905947	0.0112028	#N/A
	E2F7	1.04354	0.000908167	0.0112115	#N/A
	CNNM1	1.03527	0.000913942	0.0112376	#N/A
	APOA2	66.9547	0.000928182	0.0113899	#N/A
	NKG7	1.4125	0.000931724	0.0114257	#N/A
	CADPS	1.53588	0.000941569	0.0115081	#N/A
	CALN1	2.61625	0.000944448	0.0115204	#N/A
	PSTPIP1	1.28064	0.000945558	0.0115231	#N/A
	FCRL2	6.87019	0.000945918	0.0115231	#N/A
	GUCA1C	30.693	0.000974162	0.0118124	#N/A
	PDK4	1.33038	0.000975379	0.0118194	#N/A
	MEI1	1.32333	0.000982505	0.0118961	#N/A
	SPRED3	1.20701	0.000983642	0.0118961	#N/A
	MT1H	5.37116	0.000986083	0.0119178	#N/A
	PRSS3	8.37073	0.000988053	0.0119337	#N/A
	FCGR3B	4.59072	0.000991616	0.0119689	#N/A
	FAM129C	10.2241	0.000997039	0.0120108	#N/A
	OSR1	2.51598	0.000998199	0.0120169	#N/A
	CXCR4	1.2903	0.00101401	0.0121833	#N/A
	NRCAM	1.48366	0.00101707	0.0122121	#N/A
	CUZD1	12.4584	0.00102479	0.0122735	#N/A
	CNR2	8.94875	0.00102499	0.0122735	#N/A
	LIMD2	1.15438	0.00103322	0.0123416	#N/A
	FAM55D	17.5649	0.00103898	0.0123754	#N/A
	GJA3	1.62731	0.00103984	0.0123754	#N/A
	CD28	2.148	0.00104077	0.0123754	#N/A
	KIAA0319	1.3567	0.00104117	0.0123754	#N/A
	VIP	5.8105	0.00104246	0.0123798	#N/A
	KBTBD8	1.14488	0.00106532	0.0126106	#N/A
	FOXJ1	2.08868	0.00106716	0.0126162	#N/A
	PLEKHN1	1.22224	0.00108485	0.0128088	#N/A
	SPRR2D	4.91334	0.00110568	0.0130238	#N/A
	DYNLRB2	1.4138	0.00110784	0.0130386	#N/A
	FAM155B	1.05333	0.00110901	0.0130439	#N/A
	SALL1	1.07368	0.00111548	0.0131117	#N/A
	PCDH8	10.432	0.00111651	0.0131145	#N/A
	NFATC1	1.31213	0.00112623	0.0132043	#N/A
	LTA	2.50545	0.00112797	0.0132164	#N/A
	PPP1R16B	1.40402	0.00112954	0.0132264	#N/A
	DEFA6	91.7576	0.00114211	0.0133396	#N/A
	CLEC4C	9.02137	0.00114571	0.0133732	#N/A
	SDK1	1.0347	0.00115041	0.0134195	#N/A
	MT1M	1.92675	0.00115941	0.0135074	#N/A
	CFP	1.83076	0.00116306	0.0135177	#N/A
	IL2RB	1.1291	0.0011637	0.0135177	#N/A
	FOXN4	3.65172	0.00116594	0.0135177	#N/A
	TIGIT	2.30312	0.00116617	0.0135177	#N/A
	C4orf49	1.21114	0.00116765	0.0135264	#N/A
	PARVG	1.04545	0.00117596	0.0136068	#N/A
	C16orf89	2.9239	0.0011782	0.0136098	#N/A
	GPR78	3.63833	0.00117854	0.0136098	#N/A
	RSPO1	3.2152	0.00118512	0.0136772	#N/A
	SSTR1	1.65434	0.00119038	0.0137292	#N/A
	MS4A8B	1.90024	0.0011913	0.0137312	#N/A
	HLA-DOA	1.19203	0.00119445	0.013759	#N/A
	PCSK4	1.02661	0.00120622	0.0138598	#N/A
	DUSP27	18.6826	0.00120735	0.0138642	#N/A
	A2BP1	6.20471	0.00121046	0.0138819	#N/A
	C14orf139	1.12906	0.00121098	0.0138819	#N/A
	C4A	1.15666	0.00121144	0.0138819	#N/A
	CD19	9.97974	0.00121931	0.013958	#N/A
	LOC723809	4.72798	0.00122847	0.0140541	#N/A
	AACSL	2.57728	0.00122938	0.0140559	#N/A
	CST7	1.33234	0.00123696	0.0141265	#N/A
	PCP2	1.36015	0.00125246	0.0142666	#N/A
	RNASE6	1.02203	0.00127007	0.0144404	#N/A
	SLAMF6	1.90783	0.00128359	0.0145761	#N/A
	C12orf63	1.48215	0.00128503	0.0145835	#N/A
	LOC91149	2.89001	0.00128728	0.0146	#N/A
	POU2F2	1.48029	0.00129181	0.0146417	#N/A
	PGLYRP2	5.7618	0.00129254	0.0146417	#N/A
	IKZF3	2.81942	0.00129357	0.0146443	#N/A
	TACR2	7.21268	0.00130084	0.0147086	#N/A
	ADAMTS8	3.09302	0.00130574	0.0147455	#N/A
	GYPE	1.13319	0.00130652	0.0147455	#N/A
	KRT79	1.7108	0.00132015	0.0148716	#N/A
	CDHR1	1.41116	0.00132091	0.0148716	#N/A
	LRRK2	1.42327	0.00132264	0.014882	#N/A
	DNASE1L3	4.31895	0.00132398	0.0148879	#N/A
	GATA1	1.82847	0.00133731	0.0150195	#N/A
	C17orf54	35.366	0.00134906	0.0151145	#N/A
	CTNND2	1.80156	0.00135107	0.0151279	#N/A
	RBPMS2	1.90957	0.00136139	0.0152171	#N/A
	IL24	5.08339	0.00136944	0.0152549	#N/A
	GZMM	2.27596	0.00139615	0.0154821	#N/A
	KLK1	10.7136	0.00140743	0.0155884	#N/A
	RASGRP2	2.50364	0.00140928	0.0155995	#N/A
	LOC606724	1.54611	0.0014112	0.0156114	#N/A
	FAM26F	1.46428	0.00142136	0.0157143	#N/A
	PRR7	1.11265	0.00144109	0.0158848	#N/A
	MS4A14	1.19497	0.00144223	0.0158878	#N/A
	CCL19	4.96151	0.00144767	0.0159291	#N/A
	HLA-DOB	2.3779	0.00144786	0.0159291	#N/A
	WIF1	9.93963	0.00144944	0.0159291	#N/A
	TXNDC3	1.94911	0.00147	0.0160784	#N/A
	TIFAB	2.89901	0.00148528	0.016207	#N/A
	TCEAL2	2.3168	0.00150724	0.0164271	#N/A
	PTPRC	1.84672	0.00152554	0.0165873	#N/A
	FOSL1	1.06755	0.00153978	0.0167322	#N/A
	SRL	1.10889	0.0015437	0.0167551	#N/A
	CXorf58	1.65184	0.00155033	0.0168073	#N/A
	SAMD3	1.00579	0.00155528	0.016851	#N/A
	TRIM50	6.6868	0.00155757	0.0168659	#N/A
	VWA5B1	2.49121	0.00156104	0.0168935	#N/A
	PKHD1L1	5.46067	0.00156677	0.0169455	#N/A
	APOC2	1.78203	0.0015795	0.0170433	#N/A
	EEF1A2	1.76137	0.00160514	0.0172829	#N/A
	GPR182	1.8611	0.00163784	0.0175392	#N/A
	MIMT1	2.95797	0.00163961	0.017548	#N/A
	FZD9	5.4947	0.00165368	0.0176779	#N/A
	CNTN2	3.34855	0.00167059	0.0178381	#N/A
	SH3GL2	2.33439	0.00167262	0.0178494	#N/A
	TIMD4	5.39098	0.0016764	0.0178632	#N/A
	GPR55	1.68474	0.00167682	0.0178632	#N/A
	MUC12	3.37384	0.00167949	0.0178812	#N/A
	SYN1	1.08416	0.00169038	0.0179763	#N/A
	NAPSB	1.69181	0.00169279	0.0179916	#N/A
	CEACAM4	2.0085	0.00169715	0.0180275	#N/A
	SIGLEC10	1.37571	0.00170744	0.0181159	#N/A
	SYT7	1.4991	0.00172013	0.0182401	#N/A
	ITM2A	1.40517	0.00172319	0.018262	#N/A
	MYOCD	4.33764	0.00172913	0.0183014	#N/A
	SCRG1	3.11986	0.00172989	0.0183014	#N/A
	ART3	5.94066	0.00173947	0.0183817	#N/A
	CCR4	2.98601	0.00175809	0.0185466	#N/A
	EOMES	2.69067	0.00177573	0.0187112	#N/A
	MAPK8IP1	1.01719	0.00180911	0.0189866	#N/A
	TPSAB1	1.04944	0.00182299	0.019074	#N/A
	TNFAIP8L3	1.02434	0.00182466	0.019074	#N/A
	PPP2R2C	1.52909	0.00183506	0.0191609	#N/A
	BEX1	2.34571	0.00185276	0.019302	#N/A
	GDF3	1.36117	0.00186535	0.0194033	#N/A
	TMEM61	1.17337	0.00187204	0.0194369	#N/A
	FCRL5	3.91768	0.00187585	0.0194655	#N/A
	CCL26	1.90654	0.00188214	0.0194978	#N/A
	ARHGDIG	5.31796	0.00189362	0.0196057	#N/A
	GRHL3	1.41158	0.00191449	0.0197801	#N/A
	TP53TG3B	2.44254	0.00191479	0.0197801	#N/A
	SCARNA16	2.38624	0.00191691	0.0197801	#N/A
	TCL6	4.95481	0.00192074	0.0197975	#N/A
	ZNF114	2.59091	0.00192986	0.0198661	#N/A
	CD226	1.68447	0.00193171	0.0198661	#N/A
	LILRB2	1.13977	0.00193894	0.0199171	#N/A
	C19orf69	10.5276	0.00193942	0.0199171	#N/A
	AMICA1	1.19782	0.00196874	0.0201233	#N/A
	ZC3H12D	1.64321	0.00197169	0.0201312	#N/A
	IL33	1.54578	0.00199255	0.0202879	#N/A
	FYB	1.24111	0.00201984	0.0205091	#N/A
	BRS3	3.12565	0.00202306	0.0205191	#N/A
	CDH10	2.52406	0.00202834	0.02055	#N/A
	RUNX3	1.13782	0.00206003	0.0208253	#N/A
	ICOS	2.05047	0.0020626	0.0208398	#N/A
	TNIP3	2.1701	0.00208289	0.0209988	#N/A
	CSF2RB	1.30859	0.00210658	0.0211666	#N/A
	EVI2B	1.12584	0.00210735	0.0211666	#N/A
	MUSK	4.54912	0.00210873	0.0211666	#N/A
	FAM198A	1.08794	0.00211696	0.0212261	#N/A
	C9	5.3106	0.00211943	0.0212309	#N/A
	GBP6	1.64371	0.00212035	0.0212309	#N/A
	GALR1	2.13016	0.00213274	0.0213378	#N/A
	D4S234E	1.47553	0.00213585	0.0213574	#N/A
	ANXA2P3	1.55111	0.00214831	0.0214703	#N/A
	LY6K	2.78742	0.00216078	0.0215616	#N/A
	CPA3	1.5415	0.00218204	0.0217132	#N/A
	PGA4	33.008	0.00222328	0.0220513	#N/A
	GRPR	4.14142	0.0022244	0.0220513	#N/A
	DPY19L2	1.03813	0.0022483	0.0222285	#N/A
	SMYD1	42.0926	0.00224996	0.0222329	#N/A
	RASAL3	1.11227	0.00225126	0.0222337	#N/A
	ALB	8.26156	0.00226645	0.022346	#N/A
	LOC389493	1.94948	0.00227001	0.022359	#N/A
	KNG1	12.6289	0.00227828	0.0224164	#N/A
	KIR3DL1	5.48674	0.00228112	0.0224325	#N/A
	TPSB2	1.14808	0.00232907	0.0228308	#N/A
	CD53	1.09732	0.00235064	0.0229689	#N/A
	TMEM52	4.50126	0.00235488	0.0229738	#N/A
	TCTE1	1.51595	0.00235755	0.0229877	#N/A
	MYL2	14.0181	0.00236431	0.0230292	#N/A
	C19orf30	2.95946	0.0023827	0.0231838	#N/A
	CRYAB	1.18972	0.0023863	0.0232002	#N/A
	KLC3	1.12175	0.00239513	0.0232556	#N/A
	ALPI	16.4779	0.00241055	0.0233684	#N/A
	CD5	1.57475	0.00243005	0.023545	#N/A
	CLEC9A	2.6222	0.00244269	0.0236427	#N/A
	SLITRK2	1.60612	0.00244553	0.0236551	#N/A
	FLJ35024	1.20293	0.00246894	0.0238341	#N/A
	GIP	30.3444	0.00247539	0.0238639	#N/A
	LOC728606	4.29024	0.00247592	0.0238639	#N/A
	MYBPC2	4.35855	0.00250272	0.0240468	#N/A
	PRSS37	1.55306	0.00250424	0.0240488	#N/A
	EPO	7.69879	0.00252372	0.0242233	#N/A
	C5orf20	2.93628	0.00253137	0.0242756	#N/A
	LEFTY2	2.0773	0.00254448	0.0243844	#N/A
	TNFRSF13C	4.22162	0.00254852	0.0244082	#N/A
	RLBP1	13.9743	0.00254962	0.0244082	#N/A
	C3orf36	1.12171	0.00257672	0.0246194	#N/A
	CNN1	2.9099	0.00257702	0.0246194	#N/A
	LILRB5	1.73869	0.00258638	0.0246959	#N/A
	CLDN6	7.38209	0.00259192	0.0247104	#N/A
	MS4A10	30.0981	0.00259515	0.0247285	#N/A
	YSK4	3.73463	0.00261438	0.0248602	#N/A
	GBP5	1.98309	0.00262713	0.0249557	#N/A
	BTK	1.24692	0.00267109	0.0253341	#N/A
	WDFY4	1.88438	0.00268096	0.0254146	#N/A
	CTRL	12.6791	0.00268452	0.0254353	#N/A
	SLITRK6	1.51654	0.00269924	0.0255354	#N/A
	IGFL4	2.12938	0.00271277	0.0256107	#N/A
	BEND4	4.8406	0.00275739	0.025992	#N/A
	C1orf114	1.07344	0.00278171	0.0261543	#N/A
	OR5K2	1.14566	0.0028199	0.0264143	#N/A
	IL2	7.51872	0.00284367	0.0265876	#N/A
	MYH1	2.64353	0.00284517	0.0265878	#N/A
	SERPINA3	2.72084	0.00293982	0.0273063	#N/A
	CCL16	2.42203	0.00296374	0.0274794	#N/A
	GP1BA	3.08821	0.00296387	0.0274794	#N/A
	MYRIP	1.87245	0.00298094	0.027613	#N/A
	RAB39	1.26598	0.00298463	0.027625	#N/A
	REG1A	10.365	0.00299137	0.0276736	#N/A
	RAB39B	1.50702	0.00299359	0.0276802	#N/A
	SERPINB3	3.16122	0.00300833	0.0277774	#N/A
	TMEM14E	2.91398	0.00302912	0.0279325	#N/A
	NRAP	4.97814	0.00302998	0.0279325	#N/A
	CLECL1	1.77824	0.00304315	0.0280387	#N/A
	SEC14L5	1.05385	0.00304454	0.0280387	#N/A
	FAM55A	30.7605	0.00305493	0.0281203	#N/A
	CR2	11.1583	0.00308499	0.0283545	#N/A
	DAZ1	65.2579	0.00311756	0.0285968	#N/A
	ITIH4	3.44016	0.0031816	0.029054	#N/A
	TMPRSS9	3.00114	0.00321143	0.0292828	#N/A
	PPBP	17.3654	0.00321923	0.0293394	#N/A
	LOC154822	3.60448	0.00323369	0.0294421	#N/A
	AKAP7	1.40773	0.00323782	0.0294651	#N/A
	ZG16	17.2818	0.00324344	0.0295017	#N/A
	SIGLEC14	2.45416	0.0032507	0.0295386	#N/A
	FAM107A	1.28806	0.00331362	0.0300214	#N/A
	GREM2	3.98499	0.00337525	0.0304749	#N/A
	MYBPC1	16.1797	0.00338009	0.0305036	#N/A
	CETN4P	1.12182	0.00338471	0.0305154	#N/A
	TNFRSF17	3.37993	0.00338776	0.030528	#N/A
	C1orf95	4.91155	0.00341363	0.030716	#N/A
	C6orf218	1.62069	0.00342565	0.030794	#N/A
	LHFPL3	3.39413	0.00343207	0.0308367	#N/A
	IGF2	3.74517	0.00345465	0.0310094	#N/A
	CTXN2	2.41341	0.00345682	0.0310137	#N/A
	C3orf50	1.89555	0.00347212	0.0310904	#N/A
	FGL1	9.66191	0.00349526	0.0312521	#N/A
	TXK	1.14614	0.00351884	0.0313715	#N/A
	LILRA3	2.81592	0.00353712	0.0314899	#N/A
	SPACA3	10.1507	0.00354223	0.0315069	#N/A
	MATK	1.15123	0.00354258	0.0315069	#N/A
	SORCS1	2.53156	0.00355721	0.0316065	#N/A
	LRRTM4	1.57561	0.00356217	0.0316353	#N/A
	EBI3	1.30619	0.00360958	0.0319747	#N/A
	UBD	1.77583	0.00361081	0.0319747	#N/A
	TNFSF14	1.5086	0.0036322	0.0321333	#N/A
	NCRNA00173	2.98216	0.00364214	0.0321903	#N/A
	GGTA1	1.02231	0.0036981	0.0325443	#N/A
	MGC29506	2.64013	0.00370744	0.0325993	#N/A
	ODF3L2	1.1865	0.00374009	0.0328668	#N/A
	FOXD4L6	1.08324	0.0037423	0.0328705	#N/A
	AGAP2	1.01476	0.00376669	0.0330218	#N/A
	L1CAM	1.35237	0.00377778	0.0330874	#N/A
	C2orf85	4.66735	0.00378624	0.03313	#N/A
	PRKCB	1.92986	0.00384504	0.0335096	#N/A
	CCDC155	5.70951	0.00385376	0.0335614	#N/A
	P2RY14	1.66721	0.003869	0.0336465	#N/A
	GUCA2B	5.10832	0.00388266	0.0337416	#N/A
	SLFN12L	1.16257	0.00388361	0.0337416	#N/A
	S100G	20.0078	0.00388806	0.0337567	#N/A
	ALPPL2	11.6775	0.00397128	0.0342609	#N/A
	MYL7	5.28892	0.0039823	0.0343398	#N/A
	PRSS1	15.3247	0.00400732	0.0345233	#N/A
	IL1RAPL1	2.84263	0.00400929	0.0345241	#N/A
	LMO3	2.05781	0.00402403	0.0345863	#N/A
	MLN	57.0406	0.00402692	0.0345951	#N/A
	TNFSF8	1.76711	0.0040376	0.0346223	#N/A
	LCK	1.07054	0.00405246	0.0347118	#N/A
	GRM5	3.41426	0.00405898	0.0347248	#N/A
	KIAA1984	1.02229	0.00407275	0.0348102	#N/A
	CD1C	1.90264	0.00409156	0.0349385	#N/A
	FCER1A	1.88947	0.00409818	0.0349736	#N/A
	UMOD	13.8239	0.00415111	0.0352185	#N/A
	CXorf22	3.16745	0.00419384	0.0354504	#N/A
	CES4	4.55352	0.00420594	0.03552	#N/A
	ADAMTS3	1.13578	0.00421537	0.0355501	#N/A
	MFAP4	1.03007	0.00424416	0.0357445	#N/A
	NEK10	1.07687	0.00425609	0.0357796	#N/A
	COL19A1	5.04857	0.0042757	0.0358789	#N/A
	NPY1R	1.05058	0.00432404	0.036202	#N/A
	TNXB	1.27495	0.0043392	0.036296	#N/A
	COL14A1	1.36992	0.00434869	0.0363589	#N/A
	ZBBX	3.05681	0.00438291	0.0366117	#N/A
	MYOT	2.52754	0.00440778	0.0367861	#N/A
	TUBB2B	1.08161	0.00441288	0.0367953	#N/A
	REG4	9.99019	0.00442695	0.036896	#N/A
	PGLYRP1	3.88268	0.00443417	0.0369393	#N/A
	CD70	1.4434	0.0045038	0.0374517	#N/A
	DNASE1	1.74548	0.00450813	0.0374708	#N/A
	GRM7	1.56737	0.0045163	0.0375008	#N/A
	TBX10	10.2083	0.00452394	0.0375175	#N/A
	MS4A15	8.29366	0.00455139	0.0376773	#N/A
	ERVFRDE1	1.40751	0.00455813	0.0377162	#N/A
	LOC100233209	1.36936	0.00461298	0.0380504	#N/A
	CAPN11	1.58313	0.00463805	0.0382229	#N/A
	CIDEC	2.84021	0.0046535	0.03832	#N/A
	HLA-DRB5	1.36702	0.00468765	0.0385283	#N/A
	CXCL11	2.28367	0.00469839	0.0385993	#N/A
	MYLK2	3.6632	0.00477359	0.0390776	#N/A
	FGFBP1	1.7067	0.00477804	0.0390967	#N/A
	ISL2	1.17556	0.00480781	0.039221	#N/A
	CD38	1.94173	0.00482673	0.03931	#N/A
	SCUBE1	2.15344	0.00482758	0.03931	#N/A
	SYT9	1.16872	0.00486901	0.0395599	#N/A
	KLRF1	1.11356	0.00489723	0.0397717	#N/A
	DAZL	4.96727	0.00491108	0.0398666	#N/A
	KLK12	25.8855	0.00492803	0.0399254	#N/A
	NGFR	1.78499	0.00497627	0.0401495	#N/A
	GRIP2	2.9006	0.00499974	0.0402492	#N/A
	LILRA5	1.07815	0.00500689	0.0402716	#N/A
	HRG	16.5774	0.00504372	0.0405147	#N/A
	CCR2	1.42964	0.00506227	0.0406254	#N/A
	CD69	1.44872	0.00509857	0.0408129	#N/A
	CUX2	2.83996	0.00511257	0.0408717	#N/A
	HSPB7	1.7487	0.00514755	0.0410978	#N/A
	IFNG	3.49463	0.00518241	0.0413224	#N/A
	PAX1	2.90282	0.00520861	0.0414954	#N/A
	GP2	14.7889	0.00523169	0.0416253	#N/A
	APOBEC3H	1.24369	0.00525579	0.0417629	#N/A
	HSPA6	4.003	0.00526283	0.0418008	#N/A
	FABP4	4.19296	0.00534767	0.0422742	#N/A
	NEFL	3.03743	0.0053699	0.0423953	#N/A
	C14orf64	2.14184	0.00539209	0.0424976	#N/A
	SNX20	1.03426	0.00540287	0.0425644	#N/A
	CHL1	1.81613	0.00541428	0.042636	#N/A
	PTPN5	1.9796	0.00552769	0.0433622	#N/A
	RRAD	1.81102	0.00553559	0.0434057	#N/A
	ZBTB32	1.09673	0.00558601	0.0436339	#N/A
	S100A8	1.50914	0.00560047	0.0437098	#N/A
	ITGAL	1.21753	0.00561257	0.0437857	#N/A
	MAGEA4	52.5461	0.00562794	0.0438499	#N/A
	P2RY8	1.10106	0.00564525	0.0438696	#N/A
	ANKRD55	2.41426	0.00570035	0.0442455	#N/A
	TRY6	10.5424	0.00575276	0.0445417	#N/A
	HOXC13	15.8532	0.00575692	0.0445532	#N/A
	PSMA8	6.07745	0.00577177	0.0446494	#N/A
	NTRK1	4.01201	0.00577596	0.0446631	#N/A
	DCAF12L1	4.58201	0.00579818	0.0447973	#N/A
	CORO1A	1.0048	0.0058132	0.0448945	#N/A
	UTS2	2.10235	0.00583161	0.0450178	#N/A
	CSDC2	1.17685	0.00583575	0.0450309	#N/A
	PRIMA1	2.88909	0.00585488	0.0451407	#N/A
	CLUL1	1.06353	0.00587332	0.0452639	#N/A
	TAGAP	1.10211	0.00591598	0.0455545	#N/A
	SELP	1.25295	0.0060043	0.0460229	#N/A
	HBD	7.77556	0.00602081	0.0461111	#N/A
	SYCP2L	3.18531	0.00602414	0.0461175	#N/A
	TTLL6	1.25196	0.00603938	0.0462149	#N/A
	DAZ2	52.453	0.00606916	0.0464043	#N/A
	CXCR2	2.16085	0.00610068	0.0465873	#N/A
	GAPT	1.39502	0.00614155	0.0468605	#N/A
	IL11	1.45352	0.00614583	0.0468685	#N/A
	OR52N4	2.53894	0.00616096	0.0469502	#N/A
	FOXB1	12.0347	0.00624704	0.0474492	#N/A
	TMED6	4.09555	0.00626155	0.0475397	#N/A
	C8B	1.89321	0.00627337	0.0475903	#N/A
	CGB1	4.92114	0.00630369	0.0477416	#N/A
	TPTE	1.11862	0.00639353	0.0483029	#N/A
	ABI3BP	1.11804	0.00644822	0.0485766	#N/A
	CLPS	20.506	0.00647434	0.0487166	#N/A
	SELE	2.80802	0.00651966	0.0489293	#N/A
	C7orf57	1.82729	0.0065216	0.0489293	#N/A

## Sheet: Sheet3
	The differential metabolism genes identified in the transcriptome analysis for TCGA cohort
	ID	Fold Change	PValue	FDR	Classification
	ABAT	2.08252	2.97808e-06	9.45747e-05	Neurotransmitter
	ADCY1	10.7391	4.87432e-25	3.45308e-22	Signalling
	ADCY2	1.12852	0.00439121	0.0366644	Signalling
	ADCY5	1.45635	0.00312236	0.0286265	Signalling
	ADH1A	5.27311	0.000912597	0.0112285	Multipurpose
	ADH1B	2.83684	0.00508707	0.0407563	Multipurpose
	ADH4	25.2345	2.65665e-06	8.57695e-05	Multipurpose
	ADH6	3.55847	1.0659e-05	0.000289568	Multipurpose
	ADH7	12.6047	4.13214e-06	0.000126639	Multipurpose
	ALDH1A1	2.68586	2.78707e-10	2.11255e-08	Multipurpose
	ALDOB	4.40995	0.00145804	0.0159665	Glycolysis
	ALOX15	1.94285	0.00174645	0.0184343	Hormone
	AMY1A	29.4022	0.000337168	0.00511135	Sugar
	AMY2B	15.6207	0.000669285	0.00886238	Sugar
	AOAH	1.8747	0.000969997	0.0117697	Other
	AQP8	13.9591	0.00536095	0.0423471	Small Molecule Transport
	AQP3	1.27084	0.000834604	0.0105726	Small Molecule Transport
	AQP4	4.47636	3.21945e-08	1.60702e-06	Small Molecule Transport
	ARG1	31.8427	2.62554e-40	4.83598e-36	Urea
	ARG2	1.73196	7.74559e-09	4.51475e-07	Urea
	ATP1A3	4.68051	5.29611e-07	2.03652e-05	Ion Transport
	ATP1B2	2.98554	4.80255e-07	1.87845e-05	Ion Transport
	ATP2A3	1.51511	2.90223e-05	0.000680971	Ion Transport
	ATP2B2	15.663	4.34264e-24	2.66624e-21	Ion Transport
	ATP4A	21.3408	0.00218143	0.0217132	Ion Transport
	HCN2	6.195	4.09974e-15	6.68257e-13	Ion Transport
	CA1	19.6364	0.00532389	0.0421223	Multipurpose
	CACNA1A	7.39183	2.38942e-11	2.21159e-09	Ion Transport
	CACNA1B	12.0578	1.31225e-15	2.4123e-13	Ion Transport
	CACNA1D	1.1067	8.6411e-05	0.00170043	Ion Transport
	CACNB2	1.32369	0.0012119	0.0138819	Ion Transport
	CACNG1	4.72862	4.21872e-05	0.000943298	Ion Transport
	CES1	2.87422	0.00199797	0.0203318	Detox
	CHI3L2	3.02011	0.000726116	0.00945182	Aminosugar
	CHRNB2	3.5165	1.87233e-05	0.000469203	Ion Transport
	CHRNG	1.69802	0.000272399	0.00429932	Ion Transport
	CYP1A2	12.1328	0.0037633	0.0330078	Steroid
	CYP2E1	1.71511	0.0039991	0.0344686	Steroid
	CYP3A4	18.0665	4.60403e-05	0.00101075	Steroid
	CYP4A11	4.93872	0.00416143	0.0352411	Fatty Acid
	DGKQ	1.36232	1.74654e-08	9.43386e-07	Membrane Lipid
	DDC	2.63758	0.00082139	0.0104411	Neurotransmitter
	DIO3	1.08693	0.00314994	0.028822	Hormone
	SLC26A3	61.6664	0.000362761	0.00541188	Small Molecule Transport
	FMO2	1.51677	0.00384062	0.0335096	Detox
	FOLR1	3.4373	0.00149277	0.016279	Small Molecule Transport
	G6PC	17.2828	0.000270951	0.00428382	Carbohydrate Storage
	GABRA1	12.63	1.37456e-11	1.32555e-09	Ion Transport
	GABRA3	3.99178	0.0021209	0.0212309	Ion Transport
	GABRB1	5.27723	8.89863e-07	3.27154e-05	Ion Transport
	GABRB2	3.84089	5.62684e-09	3.36496e-07	Ion Transport
	GABRB3	2.67828	1.56481e-05	0.000402544	Ion Transport
	GABRR1	5.76294	0.00100092	0.0120417	Ion Transport
	GATM	3.00159	0.00116092	0.0135165	Creatine
	GCH1	1.80134	3.95788e-07	1.58729e-05	BH4
	GCK	6.87458	8.76683e-10	5.93663e-08	Glycolysis
	GCNT1	1.27185	3.05858e-05	0.000713113	Glycan
	GLRA1	7.93161	2.75442e-07	1.14265e-05	Ion Transport
	GLS	1.21792	2.33932e-10	1.80284e-08	Glutamate
	GPD1	2.14164	0.00015235	0.00270863	Membrane Lipid
	GPLD1	1.71921	0.000146025	0.00262659	Glycan Anchor
	GPX3	4.32919	4.53004e-10	3.29797e-08	Glutathione
	GRIA2	3.87994	7.55335e-05	0.00151718	Ion Transport
	GRIA3	2.62994	8.54123e-05	0.00168438	Ion Transport
	GRIA4	6.70138	3.59399e-13	4.47282e-11	Ion Transport
	GRIK2	1.73828	0.000441098	0.00632756	Ion Transport
	GRIK4	1.0701	0.00644227	0.0485516	Ion Transport
	GRIK5	3.18401	5.21373e-06	0.000156403	Ion Transport
	GRIN2B	1.89477	0.00222101	0.0220414	Ion Transport
	GSTA2	6.8116	0.00235453	0.0229738	Glutathione
	GUCY2C	7.73048	0.00554123	0.043413	Signalling
	HDC	2.01812	0.0013955	0.0154821	Histidine
	HPD	7.64571	5.34894e-05	0.00114428	Tyrosine
	HTR3A	1.9586	0.000780377	0.00998872	Ion Transport
	KCNA1	5.32497	5.72234e-07	2.18672e-05	Ion Transport
	KCNA3	1.67372	0.00411375	0.0350306	Ion Transport
	KCNA5	9.68533	2.21333e-14	3.28769e-12	Ion Transport
	KCNA6	1.99009	0.000934463	0.0114365	Ion Transport
	KCNB1	4.46506	2.93611e-06	9.35643e-05	Ion Transport
	KCNC1	9.39208	4.05881e-12	4.42362e-10	Ion Transport
	KCNC2	9.57498	1.13526e-09	7.6038e-08	Ion Transport
	KCNG1	2.83823	0.000864436	0.0108387	Ion Transport
	KCNH2	1.79967	0.000333187	0.00507188	Ion Transport
	KCNJ2	1.25701	1.06997e-05	0.000290246	Ion Transport
	KCNJ3	4.70399	6.61345e-07	2.50644e-05	Ion Transport
	KCNJ6	2.68808	0.000208452	0.00346524	Ion Transport
	KCNJ10	2.5389	0.00509079	0.0407683	Ion Transport
	KCNJ11	2.28301	5.02906e-05	0.00108977	Ion Transport
	KCNMB1	1.81381	0.00367153	0.0324034	Ion Transport
	KCNN2	1.48543	7.69156e-05	0.00154158	Ion Transport
	KCNQ3	3.90756	5.7416e-10	4.09901e-08	Ion Transport
	LCT	29.3199	0.000167645	0.00291306	Sugar
	LPO	1.58983	0.00207391	0.0209197	Redox
	CYP4F3	3.73169	2.89887e-08	1.46687e-06	Fatty Acid
	MTTP	24.3112	0.000165542	0.00288469	Fatty Acid
	NOS1	4.30342	0.0020315	0.0205708	Reactive Oxygen
	NOS2	2.03022	0.00664513	0.0497143	Reactive Oxygen
	P2RX1	6.22941	1.41869e-05	0.000371704	Ion Transport
	PDE3B	1.14175	0.000490026	0.00687418	Signalling
	PDE6G	1.23489	0.00486498	0.0395446	Signalling
	ENPP2	3.3853	4.2076e-11	3.75562e-09	Nucleotide
	PGM5	2.3099	0.00244214	0.0236427	Glycolysis
	PTGIS	1.91171	0.00248152	0.0238929	Hormone
	QDPR	2.00076	4.46656e-09	2.70623e-07	BH4
	SCNN1B	3.44315	1.26278e-05	0.000334664	Ion Transport
	SI	53.9032	0.000407702	0.00593165	Sugar
	ST8SIA1	1.09417	0.000952722	0.0115951	Glycan
	SLC2A1	1.0591	0.00145303	0.01594	Small Molecule Transport
	SLC2A2	5.202	0.00197838	0.0201771	Small Molecule Transport
	SLC2A4	4.48251	0.000538527	0.0074636	Small Molecule Transport
	SLC6A4	14.2035	2.15761e-18	6.20109e-16	Small Molecule Transport
	SLC6A13	9.65074	2.69527e-15	4.59669e-13	Small Molecule Transport
	SLC7A2	3.78549	3.13043e-09	1.94139e-07	Small Molecule Transport
	SLC8A2	5.49873	1.03035e-06	3.73582e-05	Small Molecule Transport
	SLC8A3	2.96688	6.96643e-06	0.000201436	Small Molecule Transport
	SLC10A2	17.1218	0.00286768	0.0267713	Small Molecule Transport
	SLC12A3	3.41271	0.00010873	0.00205406	Ion Transport
	SLC18A1	31.5613	0.000262397	0.0041845	Small Molecule Transport
	SLC18A2	4.42906	9.40642e-09	5.36399e-07	Small Molecule Transport
	SLC22A4	1.15551	5.7294e-06	0.000169662	Small Molecule Transport
	ELOVL4	2.73393	1.22211e-08	6.75976e-07	Fatty Acid
	SULT1A2	1.03013	0.00145066	0.015933	Sulfate
	SULT2A1	38.3243	0.000657368	0.00873597	Sulfate
	ABCC8	5.84445	2.0108e-06	6.68407e-05	ABC Transporter
	TAT	7.87519	2.57837e-14	3.76913e-12	Tyrosine
	TPO	3.24122	0.00579776	0.0447973	Hormone
	TYR	4.0557	0.00120032	0.0138093	Pigment
	UGT2B10	9.40722	0.0045204	0.037505	Detox
	UGT2B15	4.01048	0.00497645	0.0401495	Detox
	SLC30A2	4.00205	0.00584253	0.0450643	Ion Transport
	BSND	6.44071	7.43057e-08	3.44745e-06	Ion Transport
	SLC7A5	1.10592	8.03025e-05	0.00159902	Small Molecule Transport
	TKTL1	5.24078	0.000901737	0.0111846	Pentose Phosphate
	PDE8B	1.34059	0.000227624	0.00372676	Signalling
	FBP2	20.7108	1.11356e-05	0.000300742	Carbohydrate Storage
	CACNA1I	3.38132	3.32412e-06	0.000104483	Ion Transport
	MGAM	3.17988	0.00563633	0.0438696	Sugar
	P2RX6	3.67882	2.17519e-07	9.18917e-06	Ion Transport
	LRAT	1.99864	0.000432285	0.0062206	Vitamin A
	CACNA2D2	1.5639	0.00667604	0.0498848	Ion Transport
	KCNB2	3.30085	1.43113e-05	0.00037343	Ion Transport
	KL	3.33677	3.42784e-06	0.000107194	Steroid
	SLC4A8	4.58693	1.84312e-10	1.45701e-08	Small Molecule Transport
	PTGES	1.21953	0.00196544	0.0201119	Hormone
	CLCA2	3.54665	0.00136152	0.0152171	Ion Transport
	PLCH2	1.65084	0.000122215	0.00227427	Membrane Lipid
	HS3ST4	10.7173	7.11999e-09	4.18988e-07	Heparin Sulfate
	HS3ST3B1	1.24408	5.67501e-05	0.00120009	Heparin Sulfate
	HCN4	7.7314	2.3744e-13	3.12386e-11	Ion Transport
	DHRS2	2.98524	0.000119017	0.00222555	Redox
	KCNMB2	2.55412	0.000983601	0.0118961	Ion Transport
	ABCA9	1.0926	0.00641577	0.0483915	ABC Transporter
	CACNG2	10.4279	7.9303e-06	0.000223241	Ion Transport
	ATP8A1	1.70975	2.37576e-06	7.7539e-05	Small Molecule Transport
	PEMT	2.85083	6.77748e-12	6.85903e-10	Membrane Lipid
	LASS1	3.248	2.46322e-05	0.000595374	Sphingolipid
	FTCD	12.688	4.80865e-12	5.11969e-10	Histidine
	CYP46A1	6.30299	6.60272e-13	8.10771e-11	Steroid
	SLC26A1	1.33735	1.40867e-06	4.89552e-05	Small Molecule Transport
	SDS	1.45799	0.00421721	0.0355501	Amino Acid
	CLCA4	13.7799	1.04858e-12	1.24605e-10	Ion Transport
	NMNAT2	2.74513	1.86326e-08	1.00349e-06	NAD
	ACSL6	2.40188	0.000263413	0.00419707	Fatty Acid
	KCNH3	6.54763	4.191e-12	4.51427e-10	Ion Transport
	SLC7A8	3.95246	3.09312e-15	5.22681e-13	Small Molecule Transport
	ABCA6	1.16005	0.0042642	0.035815	ABC Transporter
	PIK3R5	1.36218	0.000420422	0.00607353	Inositol Phosphate
	CHST5	6.2947	0.00317683	0.0290299	Glycan Sulfate
	PLD3	1.18615	5.74887e-09	3.42681e-07	Membrane Lipid
	MGAT4C	7.94573	5.65346e-10	4.0518e-08	Glycan
	PLA2G2D	5.39529	0.00117769	0.0136098	Membrane Lipid
	AK5	4.22475	3.86302e-09	2.3797e-07	Purine
	GNMT	7.41976	0.00144105	0.0158848	Other
	DHDH	1.5137	0.000432291	0.0062206	Detox
	ST8SIA5	1.50281	0.000389169	0.0057299	Glycan
	GALNT9	3.39758	0.00395404	0.0341601	Glycan
	SLC45A2	3.26159	8.78086e-08	4.02325e-06	Small Molecule Transport
	SLC22A17	5.73101	3.59533e-12	3.94181e-10	Small Molecule Transport
	NAT8B	1.69518	0.00650378	0.0488752	Multipurpose
	UPB1	1.38752	0.00237543	0.0231253	Pyrimidine
	ATP8A2	8.76827	1.30523e-19	4.37111e-17	Small Molecule Transport
	HAO1	20.5292	4.92287e-17	1.13343e-14	Glyoxylate
	PIGG	2.39051	1.60779e-25	1.23391e-22	Glycan Anchor
	CYP2W1	2.2161	0.00152191	0.0165576	Steroid
	SLC38A4	15.4786	1.16981e-22	5.98521e-20	Small Molecule Transport
	MCOLN3	1.90199	0.000166789	0.00290368	Ion Transport
	ACOXL	4.11432	4.01306e-10	2.94488e-08	Fatty Acid
	SVOP	7.20607	5.33536e-08	2.57932e-06	Small Molecule Transport
	OGDHL	2.59232	0.000362869	0.00541188	Krebs
	CACNA2D3	1.70666	0.00203294	0.020574	Ion Transport
	ADCY10	6.83536	1.82613e-15	3.23418e-13	Signalling
	SLC7A10	9.27461	0.0059253	0.0455882	Small Molecule Transport
	CA10	19.7301	1.22642e-21	5.79215e-19	Multipurpose
	TRPC7	10.8003	4.68181e-07	1.84656e-05	Ion Transport
	SLC4A10	3.58216	7.27694e-05	0.00147128	Small Molecule Transport
	SLC12A5	23.0065	9.29465e-33	2.48309e-29	Ion Transport
	HCN3	1.20251	1.07182e-06	3.8483e-05	Ion Transport
	SLC7A14	7.63559	1.34357e-08	7.38725e-07	Small Molecule Transport
	PRODH2	34.5888	2.56519e-28	3.37488e-25	Proline
	ACE2	4.53494	0.000574251	0.00783491	Hormone
	CACNG7	9.98046	2.01938e-08	1.06882e-06	Ion Transport
	ABCG5	4.16233	0.00368407	0.0324985	ABC Transporter
	NDST4	15.6735	0.00465399	0.03832	Heparin Sulfate
	NOX5	9.91679	1.1403e-17	2.80043e-15	NAD
	TRPM3	13.3643	4.74209e-19	1.55972e-16	Ion Transport
	ASRGL1	1.36386	0.000472058	0.00668834	Amino Acid
	KCNH6	10.8884	7.68307e-10	5.26076e-08	Ion Transport
	ACSBG2	12.5091	1.61403e-24	1.06174e-21	Fatty Acid
	ST6GALNAC5	3.74639	1.40442e-09	9.29523e-08	Glycan
	CHST9	2.21449	0.000342003	0.00516764	Glycan Sulfate
	KCNK16	6.01027	8.66207e-06	0.000240643	Ion Transport
	MFSD7	1.2776	5.05958e-06	0.000152027	Other Transport
	SLC22A16	8.71593	1.11936e-17	2.78616e-15	Small Molecule Transport
	HS6ST2	4.13326	2.86549e-08	1.45398e-06	Heparin Sulfate
	GLYATL1	2.33233	0.0037758	0.0330858	Other
	GALNT13	4.46279	1.56476e-10	1.24767e-08	Glycan
	COX6B2	2.16253	0.000505889	0.00704838	Complex IV
	ACMSD	6.55563	5.17782e-07	2.00358e-05	Tryptophan
	MDH1B	1.99143	4.65956e-06	0.000141625	Krebs
	ENPP6	1.98319	0.00088361	0.0110116	Nucleotide
	SLC34A3	1.43192	0.000201335	0.00336209	Small Molecule Transport
	LIPJ	3.88245	9.71214e-06	0.000265412	Fatty Acid
	GLT1D1	1.11227	0.00191809	0.0197812	Glycan
	RDH12	10.6133	1.89787e-16	3.97238e-14	Vitamin A
	ABHD12B	3.32217	0.000232817	0.00379156	Multipurpose
	MGAT5B	3.89328	2.01765e-08	1.06882e-06	Glycan
	SLC35F3	3.9315	9.46271e-07	3.45821e-05	Small Molecule Transport
	SLC5A8	19.118	0.00186561	0.0194033	Small Molecule Transport
	SLC30A8	4.66756	4.41169e-05	0.000974328	Ion Transport
	IDO2	3.6526	0.000234707	0.00379967	Tryptophan
	SLC29A4	3.65384	4.38194e-07	1.74322e-05	Small Molecule Transport
	MCOLN2	1.27882	0.00441153	0.0367953	Ion Transport
	HS6ST3	11.9721	2.55904e-16	5.23721e-14	Heparin Sulfate
	SLC39A5	4.858	0.00289674	0.0269743	Ion Transport
	SLC26A11	1.06079	5.48688e-06	0.000163797	Small Molecule Transport
	SLC9A9	1.00763	0.00188133	0.0194978	Small Molecule Transport
	ENPP7	11.9452	0.00105132	0.012469	Nucleotide
	NAT8L	2.99967	6.73979e-06	0.000195805	Multipurpose
	SLC35F4	12.6334	1.33769e-16	2.89871e-14	Small Molecule Transport
	PLCXD3	5.53653	8.29746e-10	5.63952e-08	Membrane Lipid
	B3GNT8	1.05309	2.27095e-05	0.000554021	Glycan
	KCTD4	7.78613	0.00192388	0.0198188	Ion Transport
	SLC16A12	1.7849	0.00506872	0.0406447	Small Molecule Transport
	SLC6A17	2.67567	0.000146937	0.00264042	Small Molecule Transport
	MCART6	1.81794	0.000274098	0.00431874	Other Transport
	GALNTL6	2.30197	0.00309987	0.0284764	Glycan
	AQP12B	9.94622	0.0047448	0.0389126	Small Molecule Transport
